# Supplementary material for: Synthesis of (+/−)-Pregabalin and its novel lipophilic β-alkyl-substituted analogues from fatty chains
Source: Royal Society of Chemistry journal article supplement (doi:10.1039/d0nj02263b), 2020-01-01
Supplement: d0nj02263b1.pdf [file d0nj02263b1.pdf]

## Supplementary Information

# Synthesis of Pregabalin and its novel lipophilic $\beta$ -alkyl-substituted analogues from fatty chains

Caroline Da Ros Montes D'Oca,<sup>\*,a,b</sup> Renata Fontes Ongaratto,<sup>c</sup> Eduardo Bustos Mass,<sup>b</sup>  
Arthur Motta de Andrade,<sup>c</sup> Marcelo G. Montes D'Oca<sup>a,c</sup> and Dennis Russowsky<sup>b</sup>

<sup>a</sup>*Departamento de Química, Universidade Federal do Paraná, Centro Politécnico, Av. Coronel Francisco H. Santos 100, Curitiba-PR, Brazil.*

<sup>b</sup>*Instituto de Química, Universidade Federal do Rio Grande do Sul, Av. Bento Gonçalves 9500, Porto Alegre-RS, Brazil*

<sup>c</sup>*Escola de Química e Alimentos, Universidade Federal do Rio Grande, Av. Itália Km 08 s/n, Rio Grande-RS, Brazil.*

## Contents

### 1. Selected <sup>1</sup>H, <sup>13</sup>C NMR and IR spectrum.....**Figures S1-80**

---

\* Corresponding author: Departamento de Química, Universidade Federal do Paraná, Centro Politécnico – Jardim das Américas, Av. Coronel Francisco H. Santos 100, Caixa Postal 19061, CEP 81.531-980, Curitiba, Paraná, Brazil. Fone: +55 41 3361-3396. E-mail address: [carolinedoca@ufpr.br](mailto:carolinedoca@ufpr.br) (CRM D'Oca).

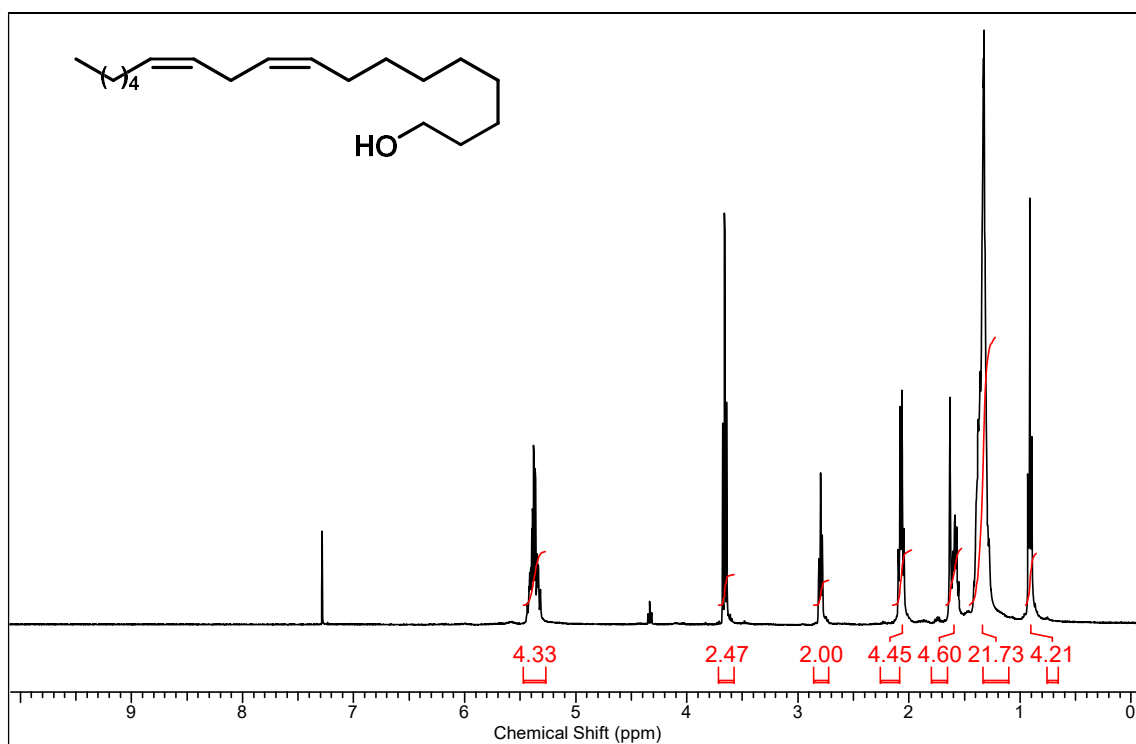

**Figure S1.** Spectrum of  $^1\text{H}$  NMR (300 MHz,  $\text{CDCl}_3$ ) of linoleic alcohol.

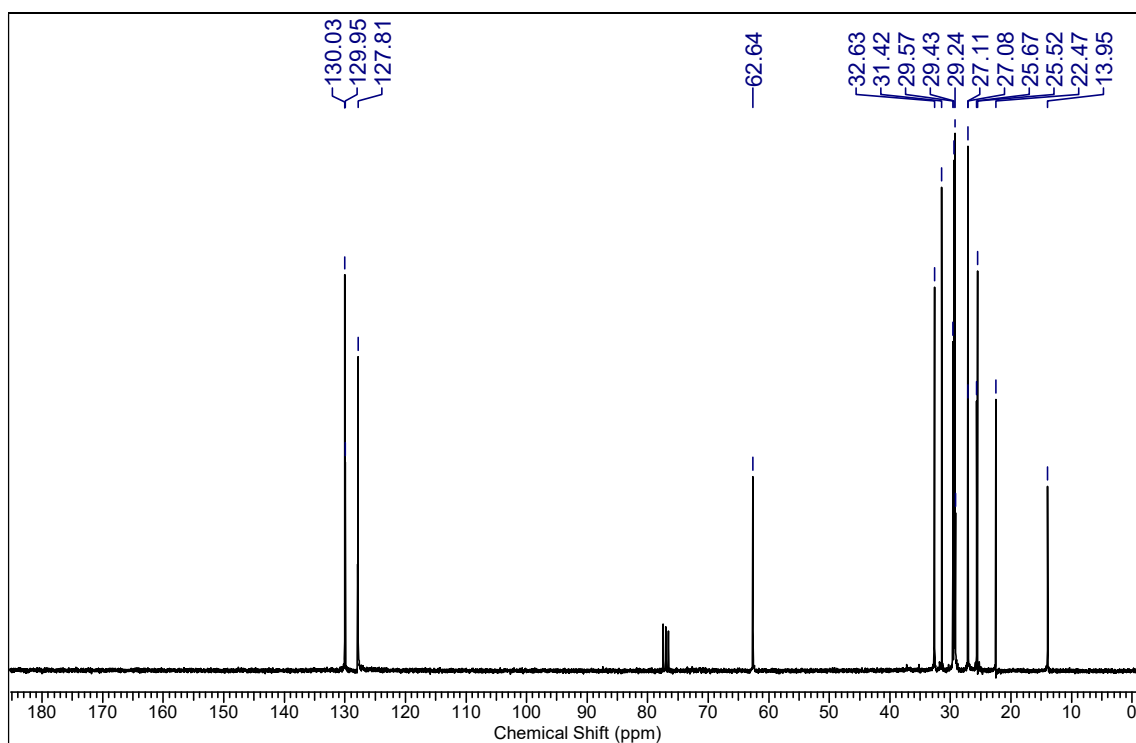

**Figure S2.** Spectrum of  $^{13}\text{C}$  NMR (75 MHz,  $\text{CDCl}_3$ ) of linoleic alcohol.

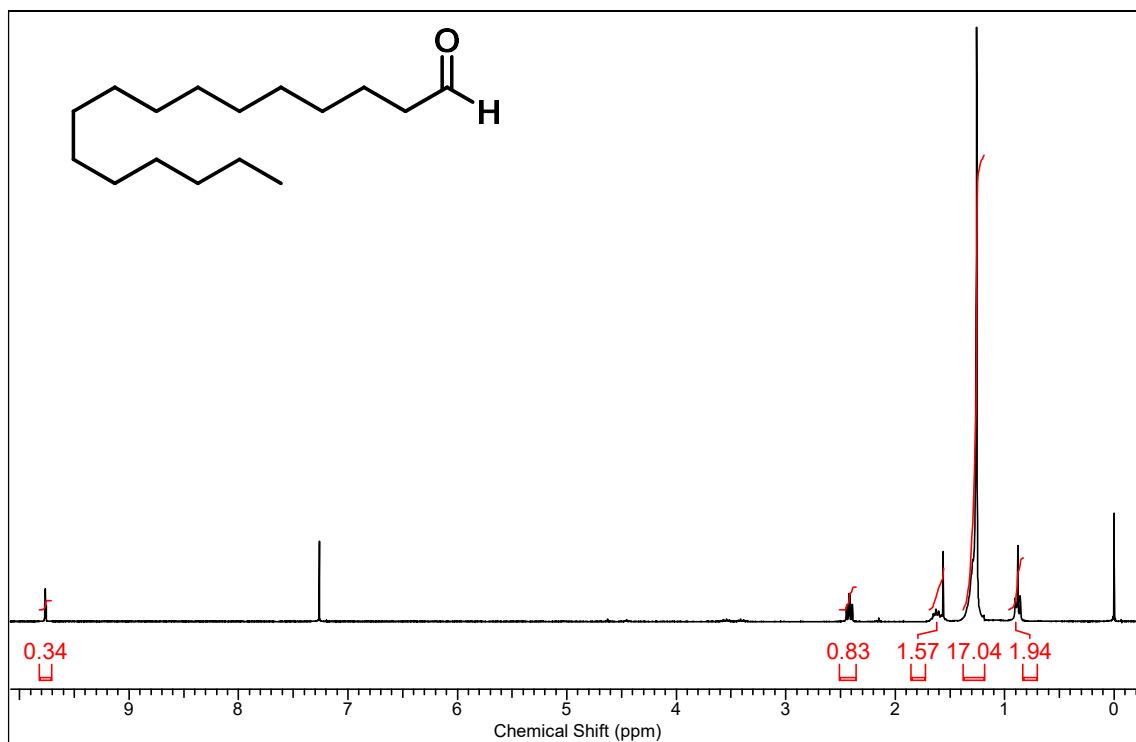

**Figure S3.** Spectrum of <sup>1</sup>H NMR (300 MHz, CDCl<sub>3</sub>) of aldehyde **6f**.

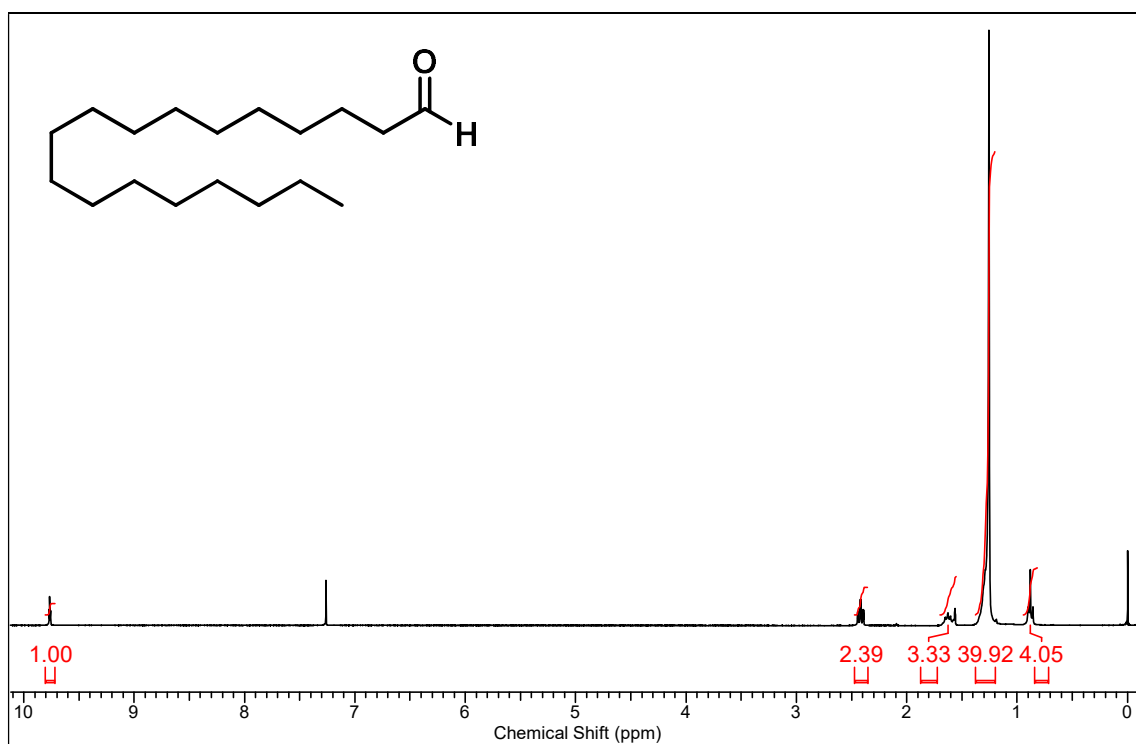

**Figure S4.** Spectrum of <sup>1</sup>H NMR (300 MHz, CDCl<sub>3</sub>) of aldehyde **6g**.

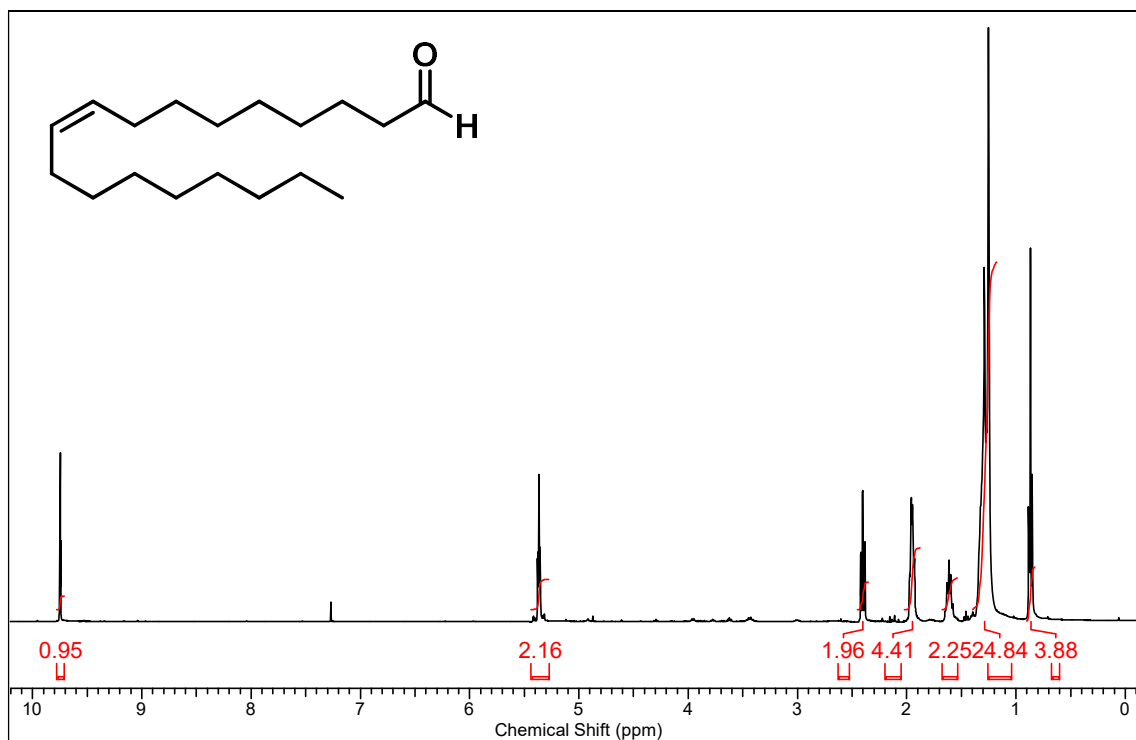

Figure S5. Spectrum of <sup>1</sup>H NMR (300 MHz, CDCl<sub>3</sub>) of aldehyde 6h.

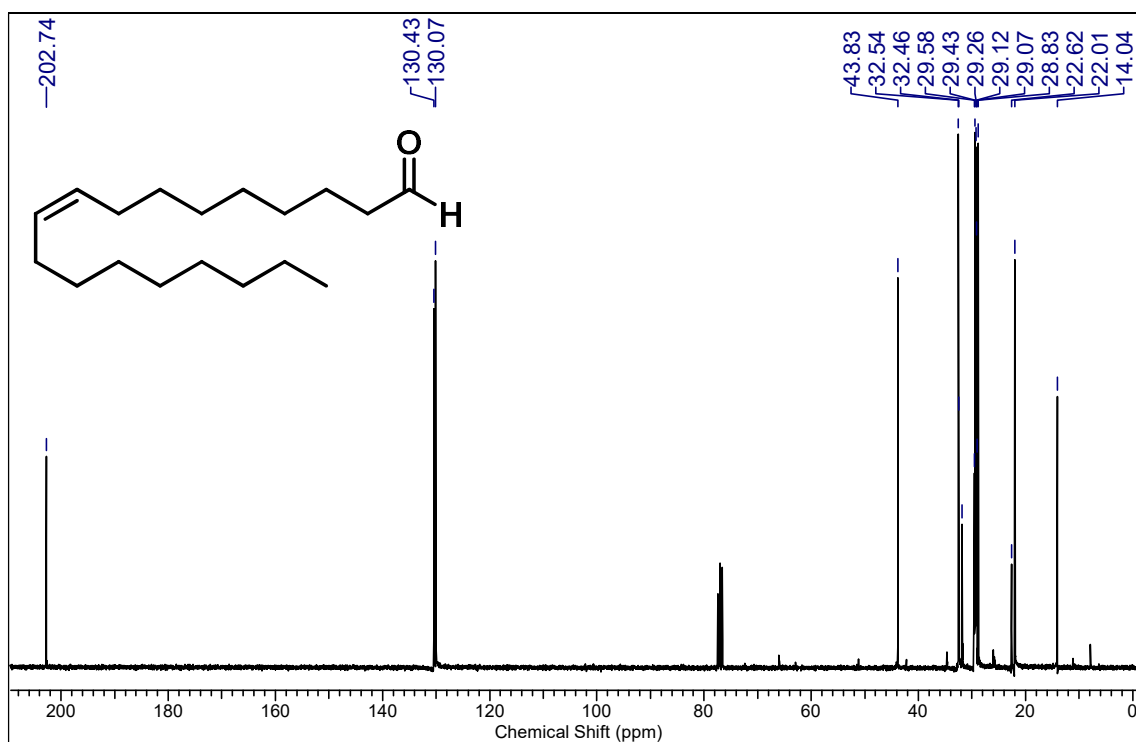

Figure S6. Spectrum of <sup>13</sup>C NMR (75 MHz, CDCl<sub>3</sub>) of aldehyde 6h.

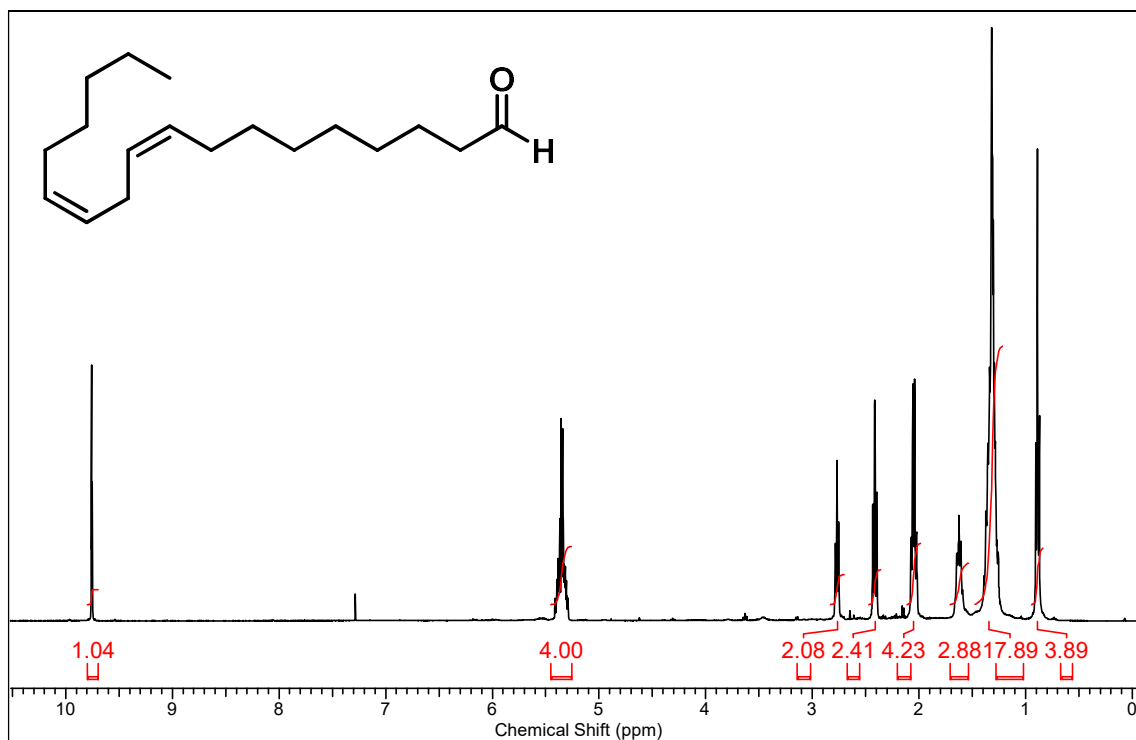

Figure S7. Spectrum of  $^1\text{H}$  NMR (300 MHz,  $\text{CDCl}_3$ ) of aldehyde **6i**.

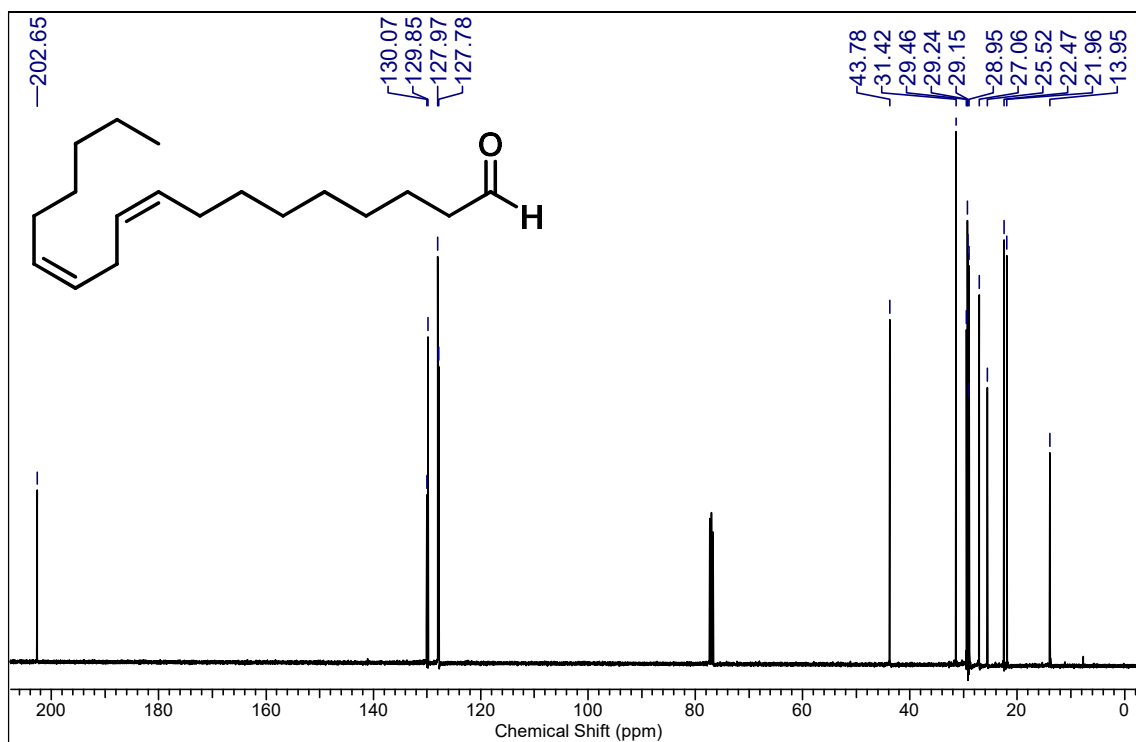

Figure S8. Spectrum of  $^{13}\text{C}$  NMR (75 MHz,  $\text{CDCl}_3$ ) of aldehyde **6i**.

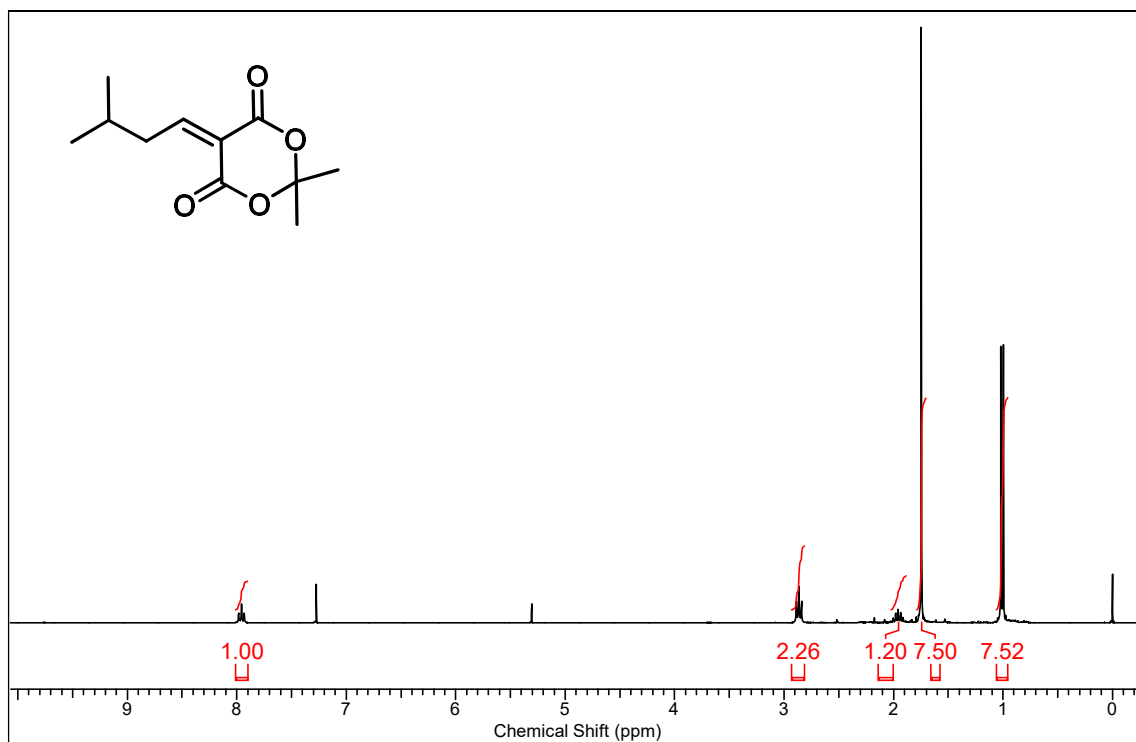

**Figure S9.** Spectrum of <sup>1</sup>H NMR (300 MHz, CDCl<sub>3</sub>) of alkylidene **9a**.

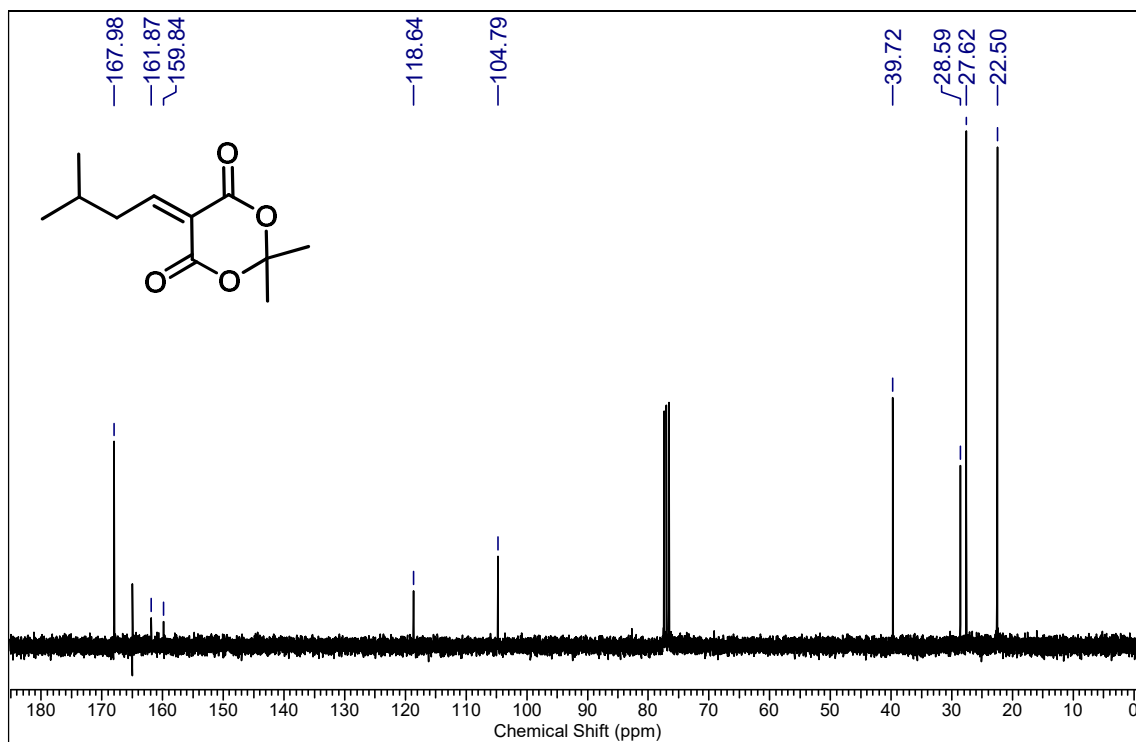

**Figure S10.** Spectrum of <sup>13</sup>C NMR (75 MHz, CDCl<sub>3</sub>) of alkylidene **9a**.

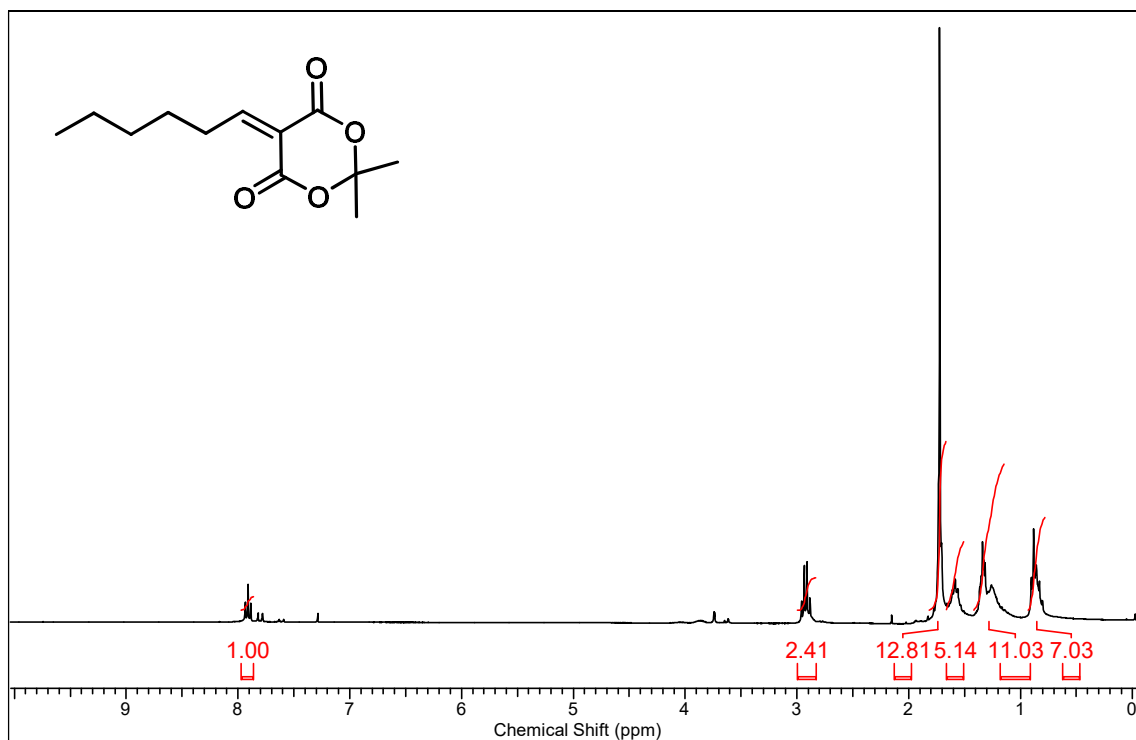

**Figure S11.** Spectrum of <sup>1</sup>H NMR (300 MHz, CDCl<sub>3</sub>) of alkyldiene **9b**.

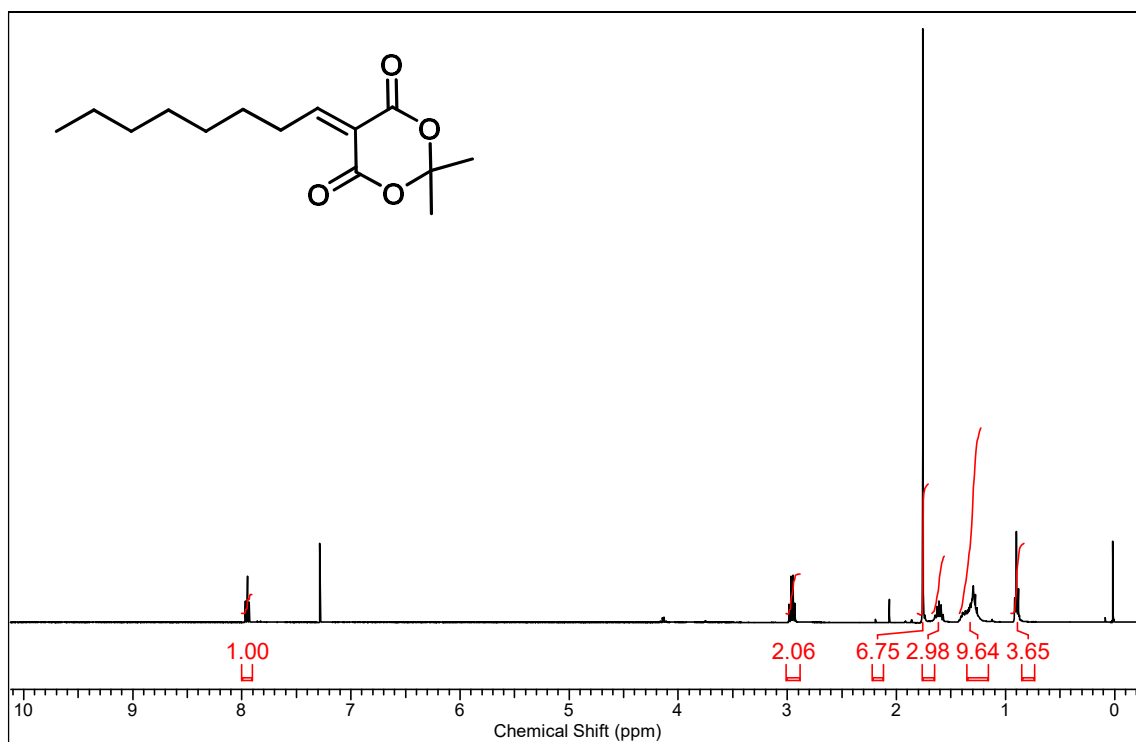

**Figure S12.** Spectrum of <sup>1</sup>H NMR (300 MHz, CDCl<sub>3</sub>) of alkyldiene **9c**.

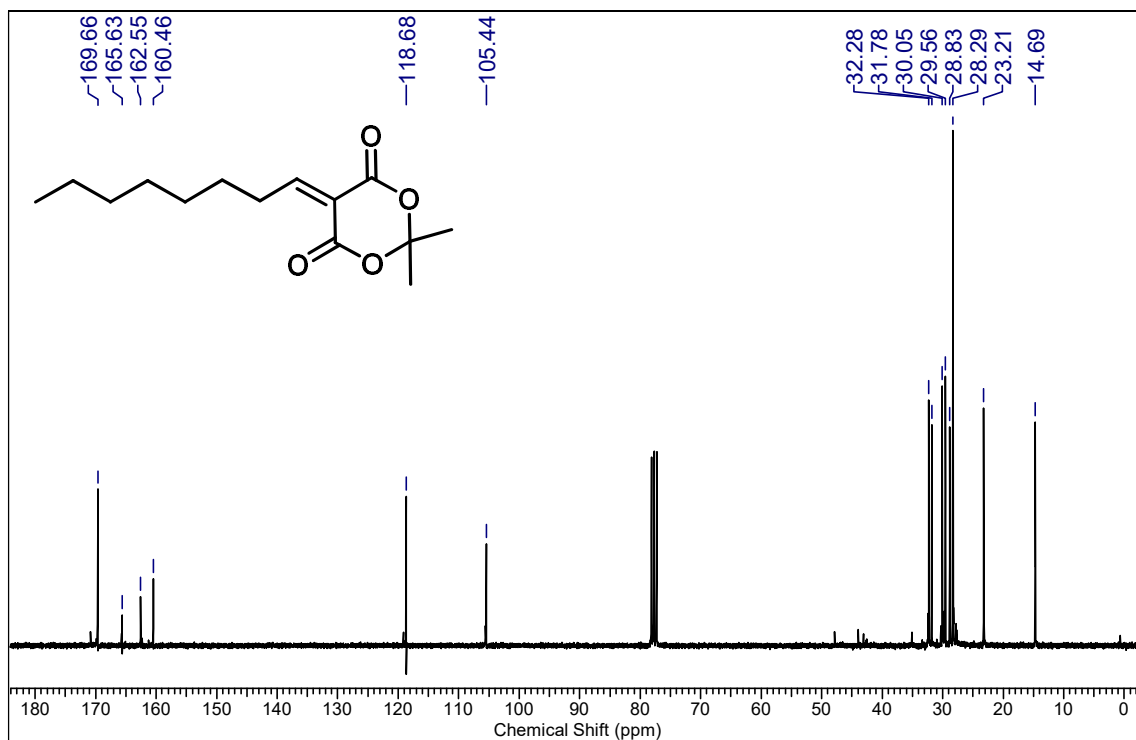

**Figure S13.** Spectrum of  $^{13}\text{C}$  NMR (75 MHz,  $\text{CDCl}_3$ ) of alkylidene **9c**.

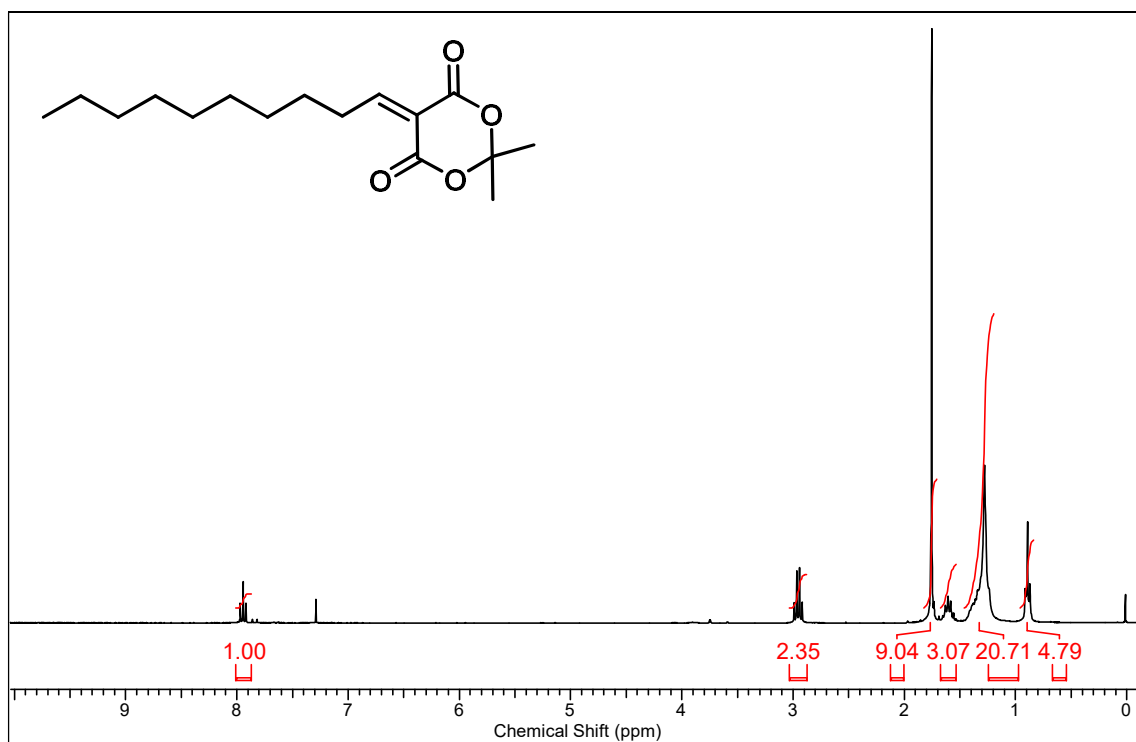

**Figure S14.** Spectrum of  $^1\text{H}$  NMR (300 MHz,  $\text{CDCl}_3$ ) of alkylidene **9d**.



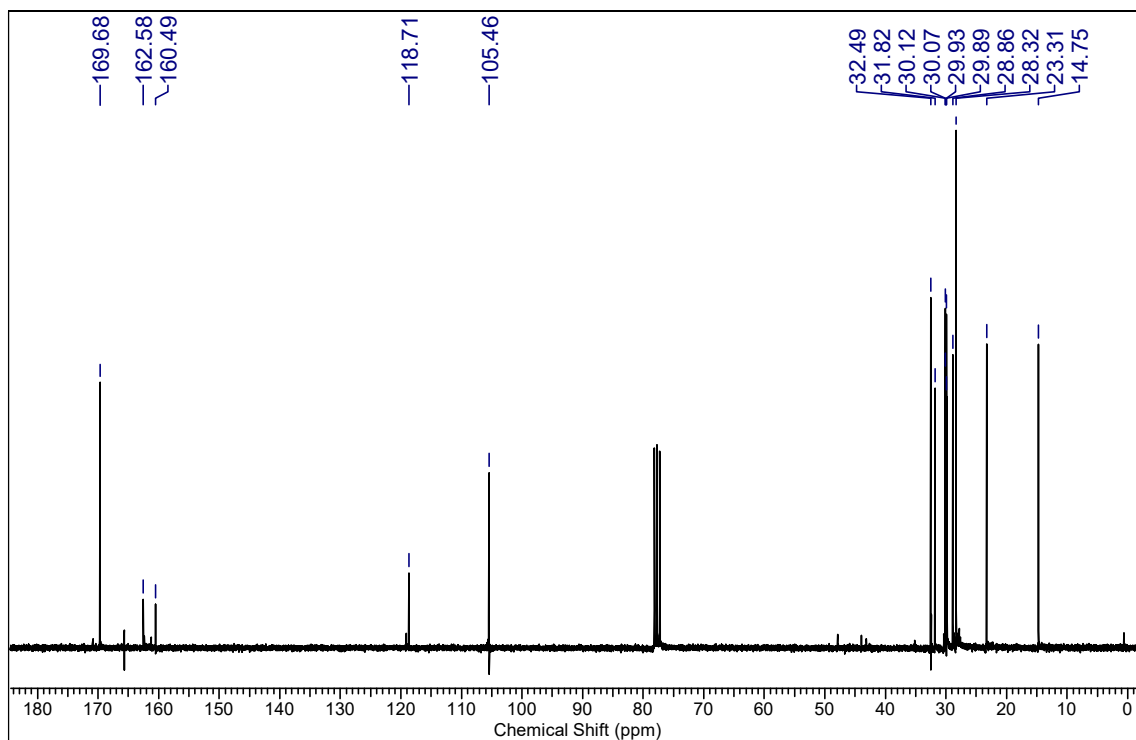

Figure S15. Spectrum of  $^{13}\text{C}$  NMR (75 MHz,  $\text{CDCl}_3$ ) of alkylidene **9d**.

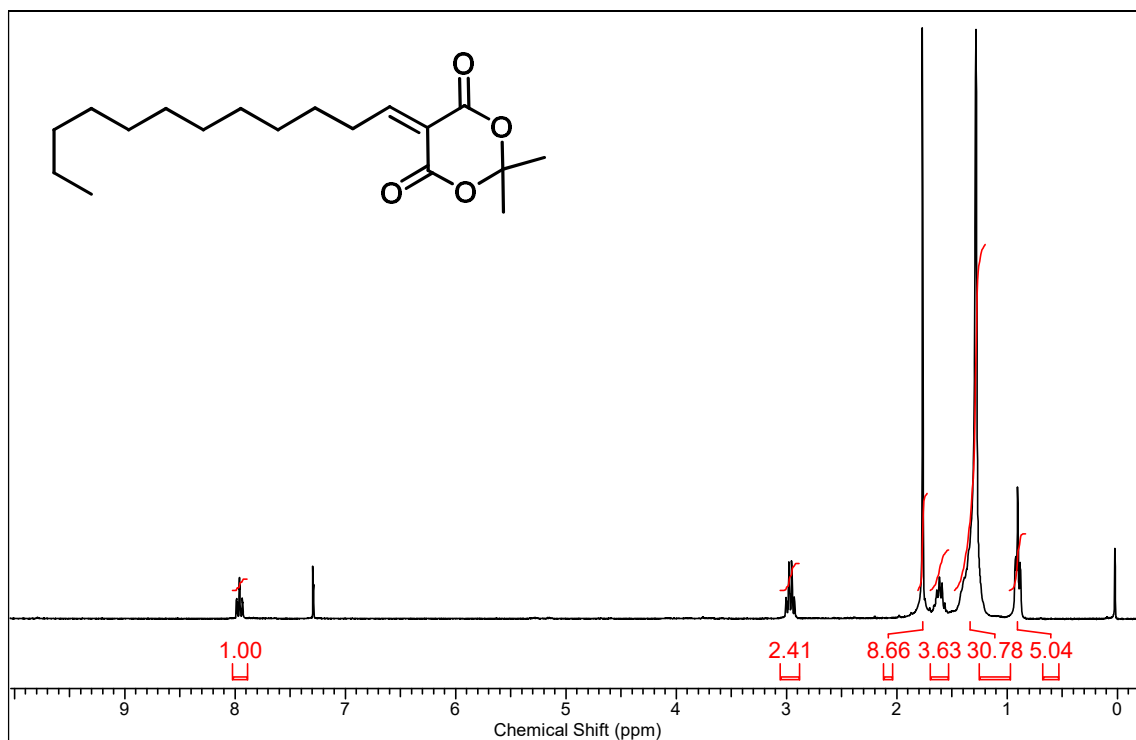

Figure S16. Spectrum of  $^1\text{H}$  NMR (300 MHz,  $\text{CDCl}_3$ ) of alkylidene **9e**.

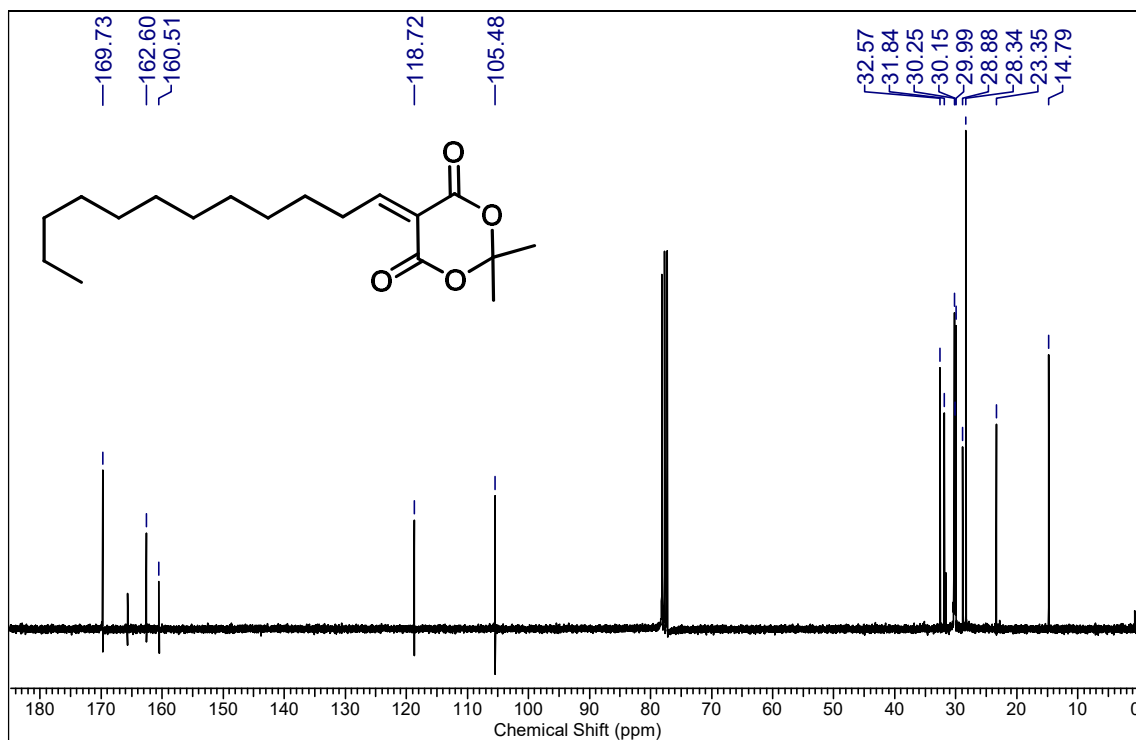

**Figure S17.** Spectrum of  $^{13}\text{C}$  NMR (75 MHz,  $\text{CDCl}_3$ ) of alkylidene **9e**.

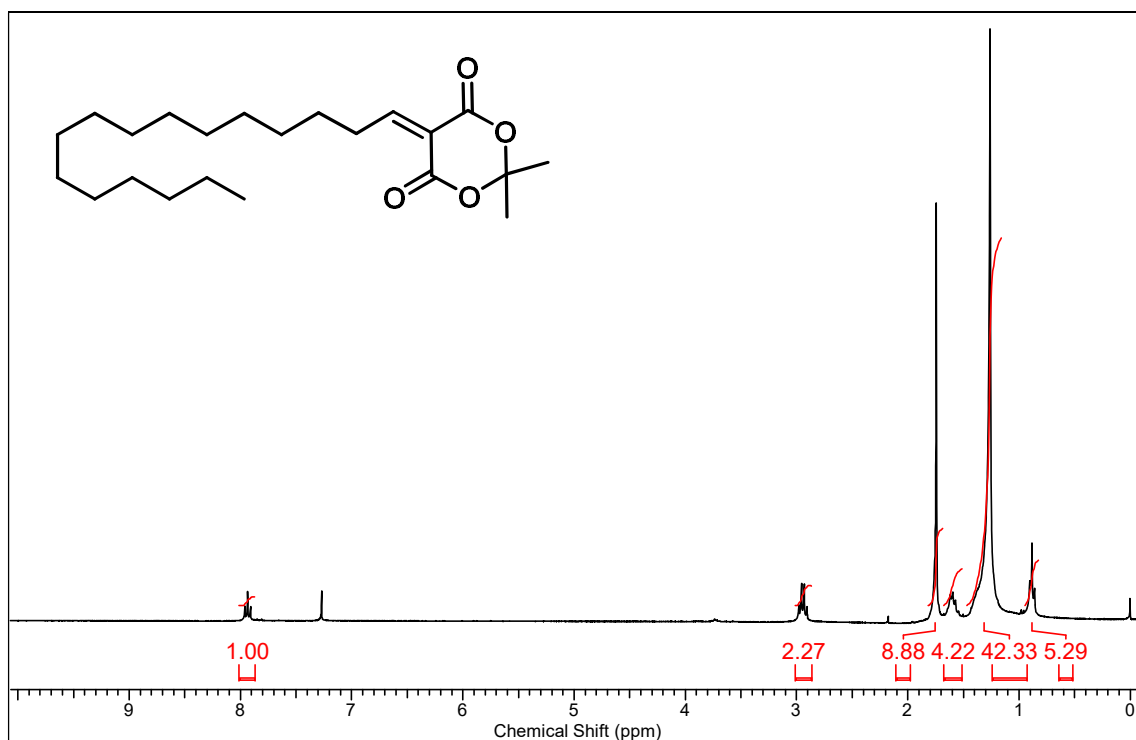

**Figure S18.** Spectrum of  $^1\text{H}$  NMR (300 MHz,  $\text{CDCl}_3$ ) of alkylidene **9f**.

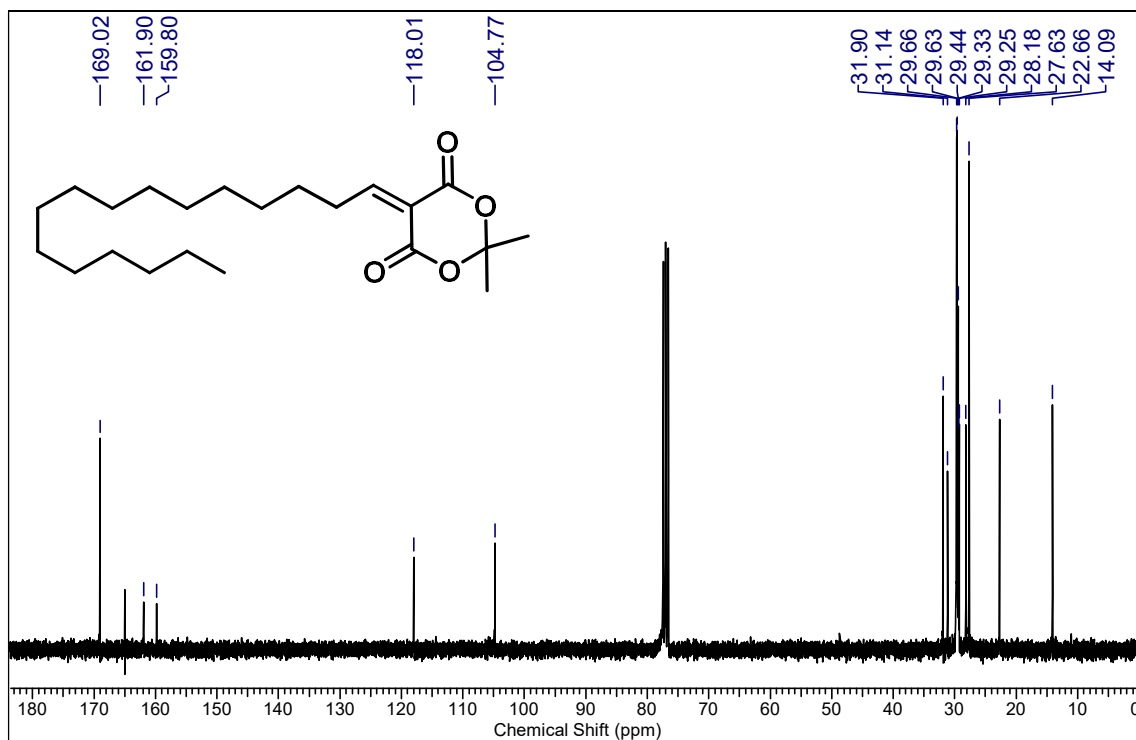

**Figure S19.** Spectrum of  $^{13}\text{C}$  NMR (75 MHz,  $\text{CDCl}_3$ ) of alkyldiene **9f**.

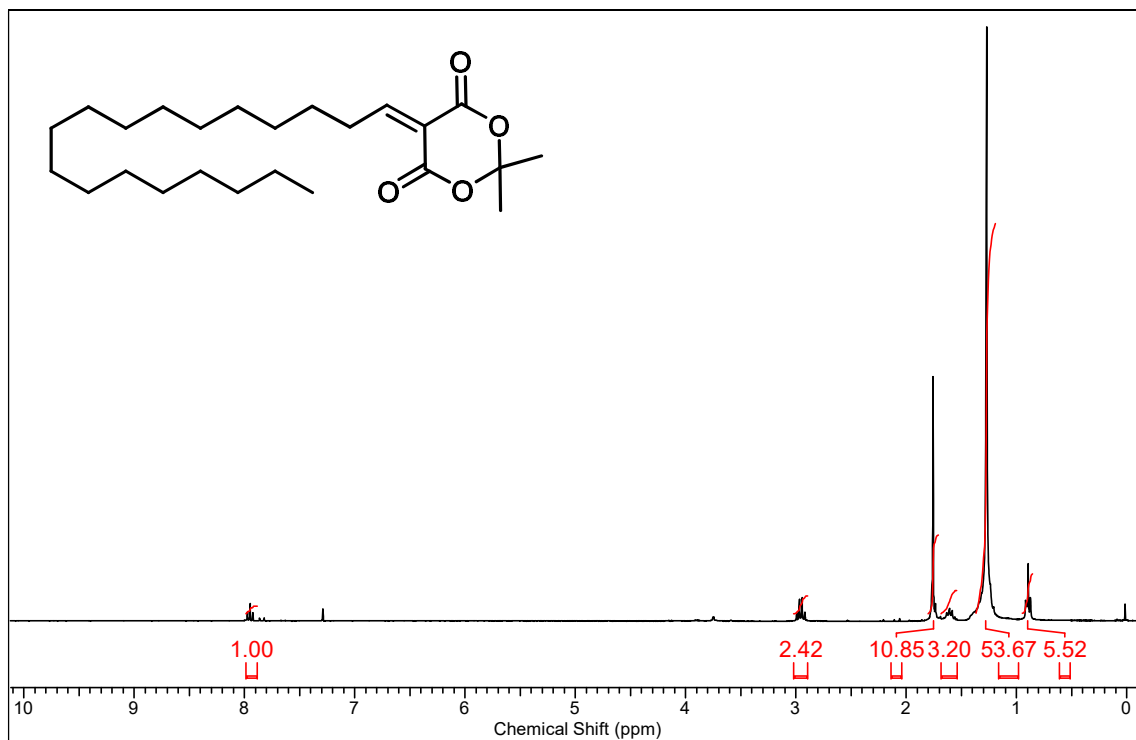

**Figure S20.** Spectrum of  $^1\text{H}$  NMR (300 MHz,  $\text{CDCl}_3$ ) of alkyldiene **9g**.

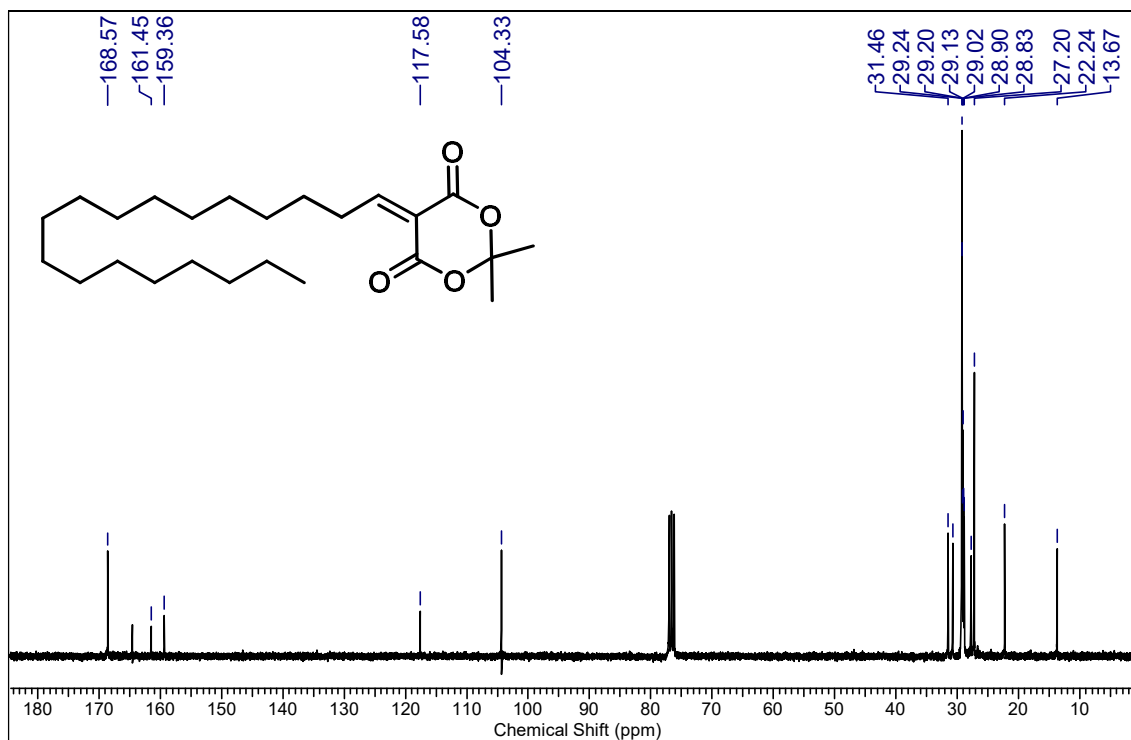

Figure S21. Spectrum of  $^{13}\text{C}$  NMR (75 MHz,  $\text{CDCl}_3$ ) of alkylidene **9g**.

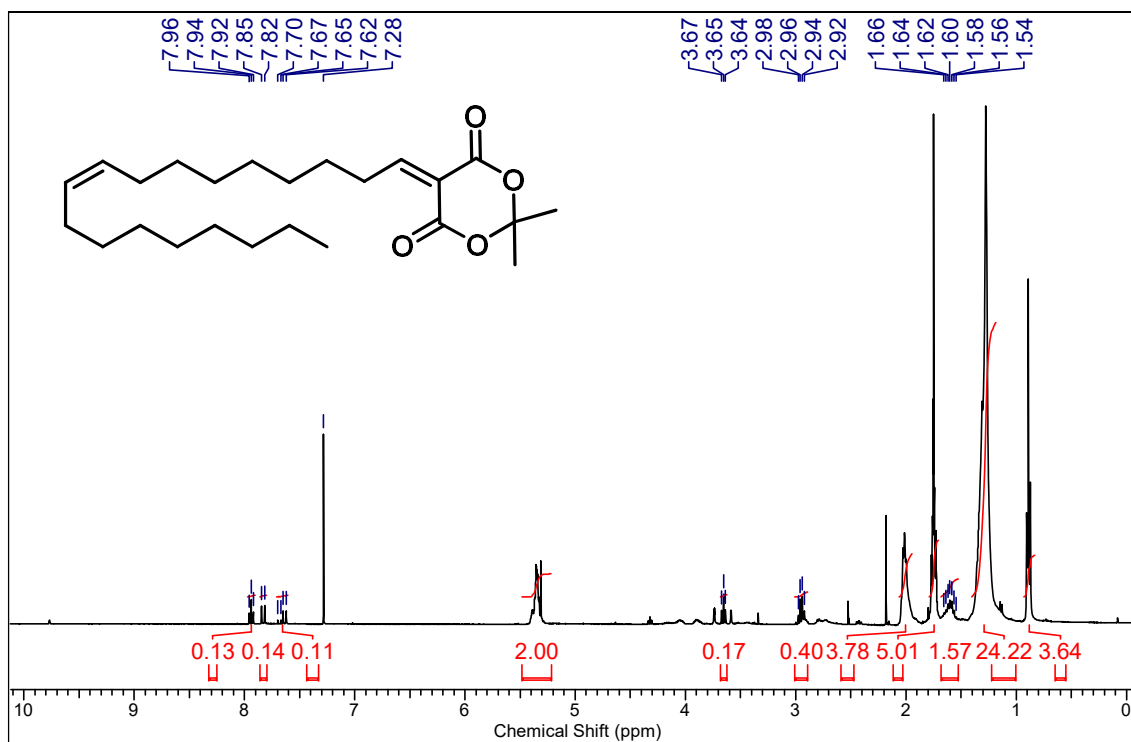

Figure S22. Spectrum of  $^1\text{H}$  NMR (300 MHz,  $\text{CDCl}_3$ ) of alkylidene **9h**.

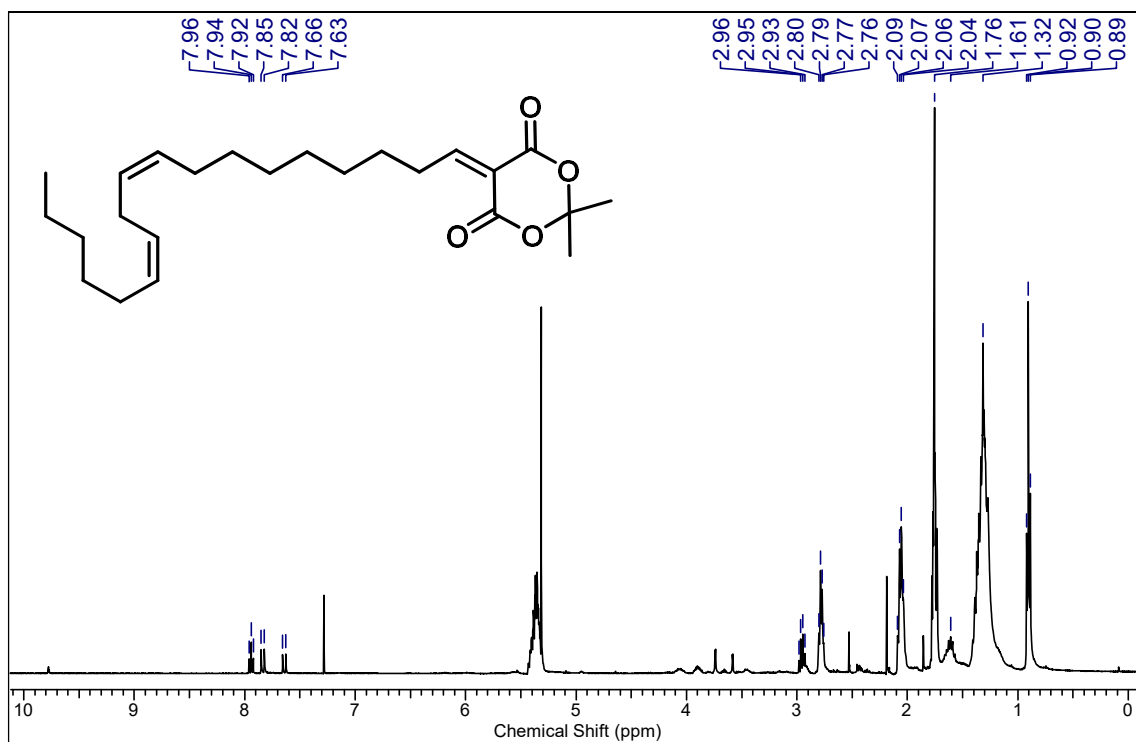

**Figure S23.** Spectrum of  $^1\text{H}$  NMR (300 MHz,  $\text{CDCl}_3$ ) of alkylidene **9i**.

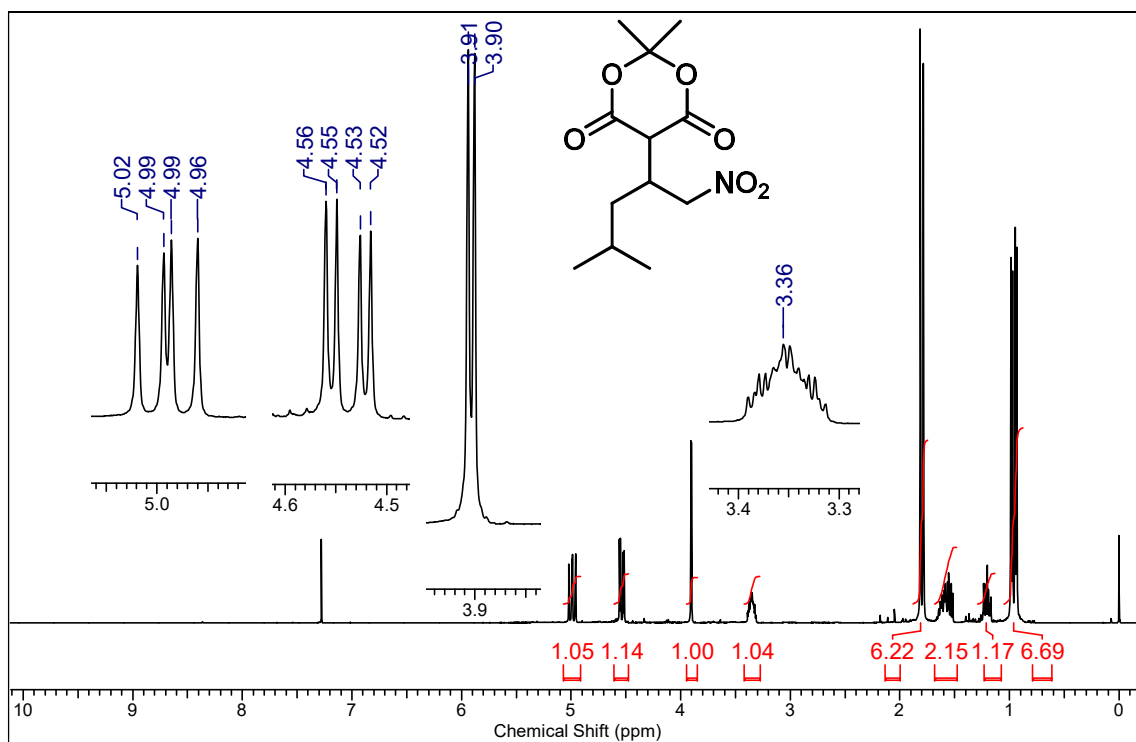

**Figure S24.** Spectrum of  $^1\text{H}$  NMR (300 MHz,  $\text{CDCl}_3$ ) of crude nitro adduct **10a**.

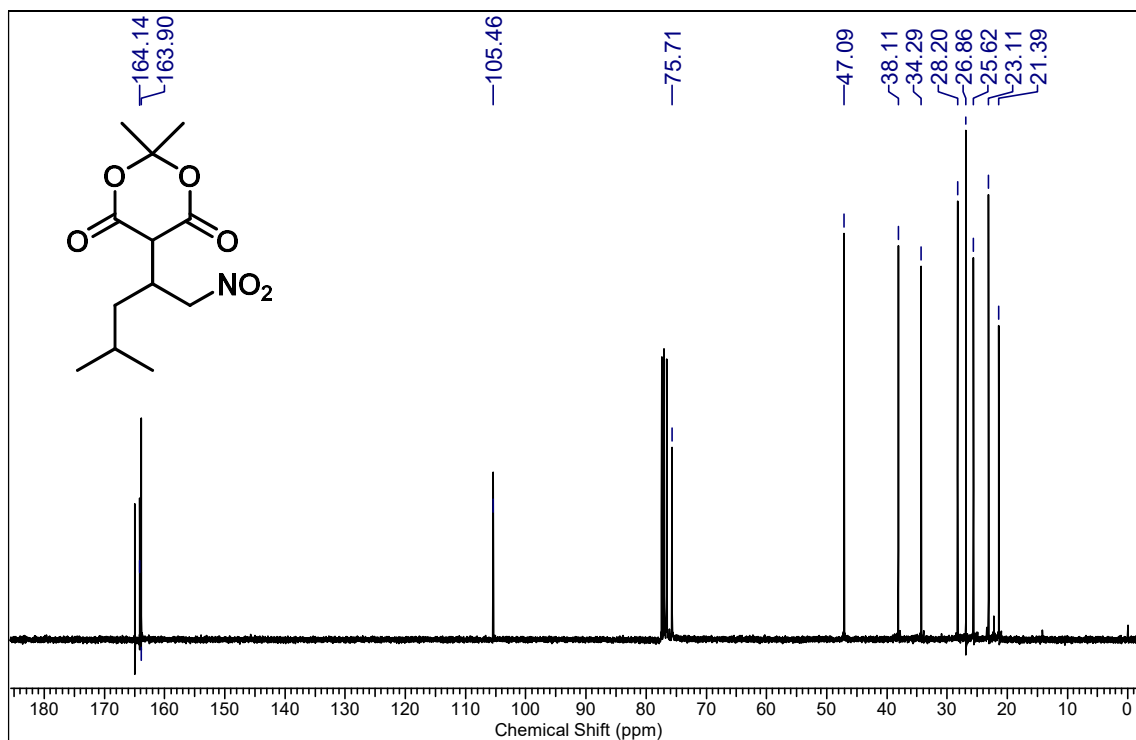

Figure S25. Spectrum of  $^{13}\text{C}$  NMR (75 MHz,  $\text{CDCl}_3$ ) of crude nitro adduct **10a**.

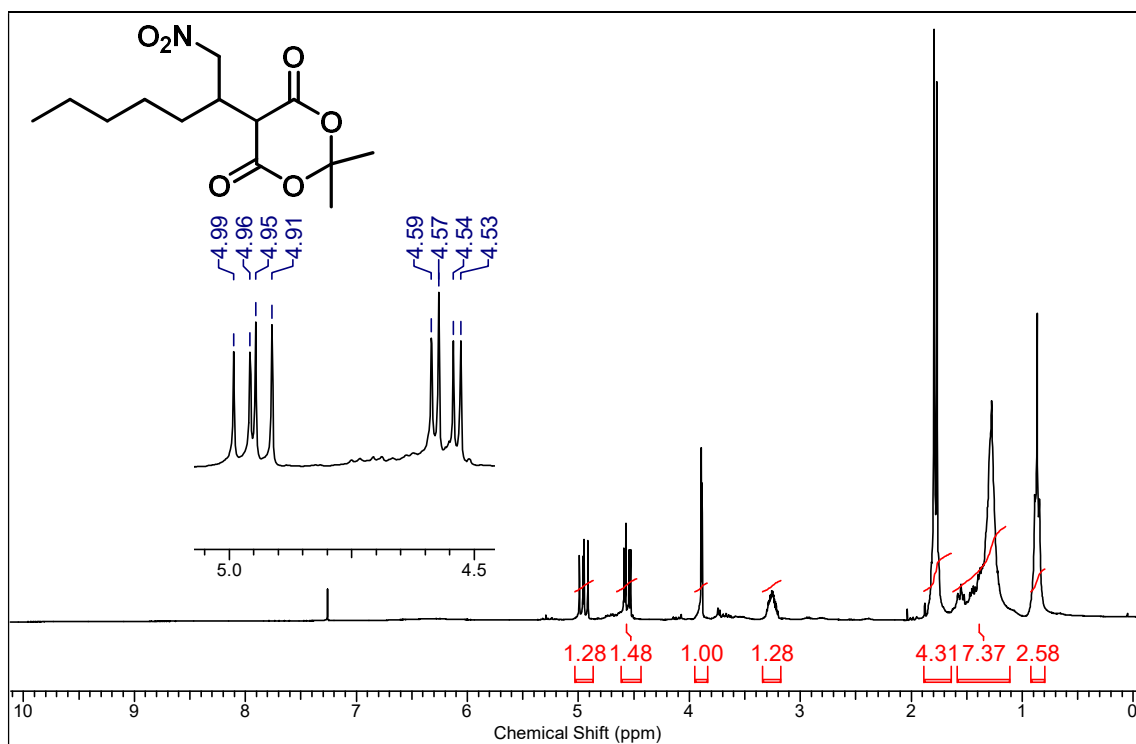

Figure S26. Spectrum of  $^1\text{H}$  NMR (300 MHz,  $\text{CDCl}_3$ ) of crude nitro adduct **10b**.

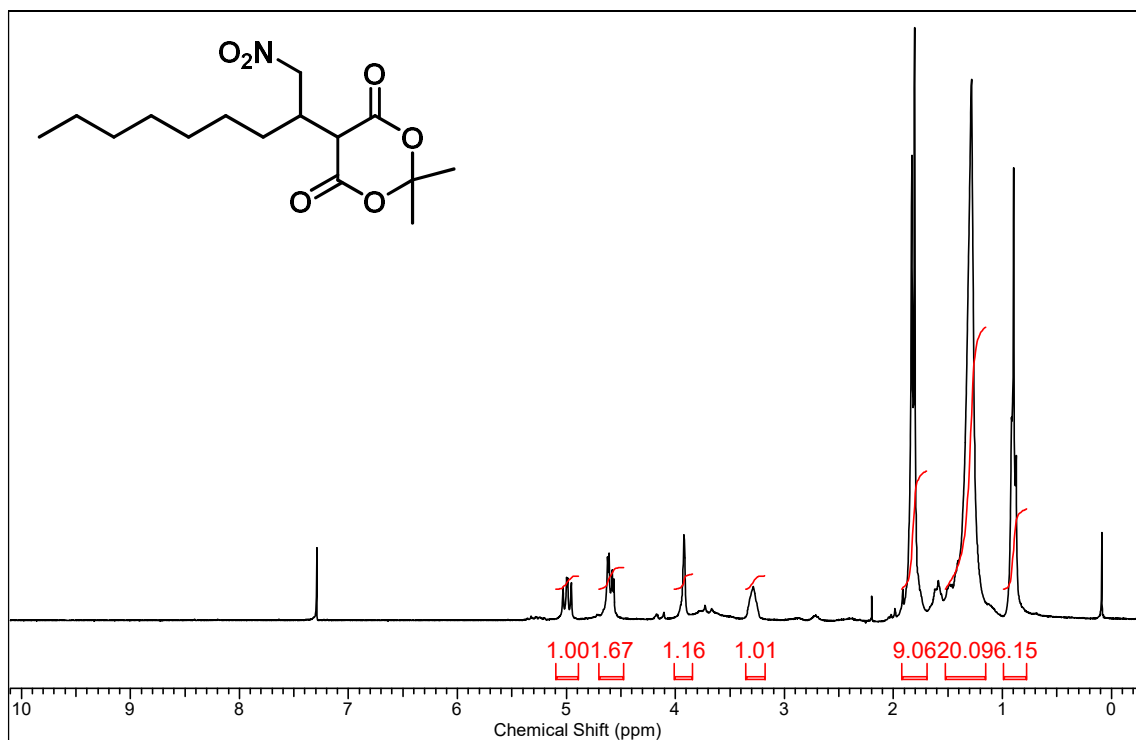

**Figure S27.** Spectrum of  $^1\text{H}$  NMR (300 MHz,  $\text{CDCl}_3$ ) of crude nitro adduct **10c**.

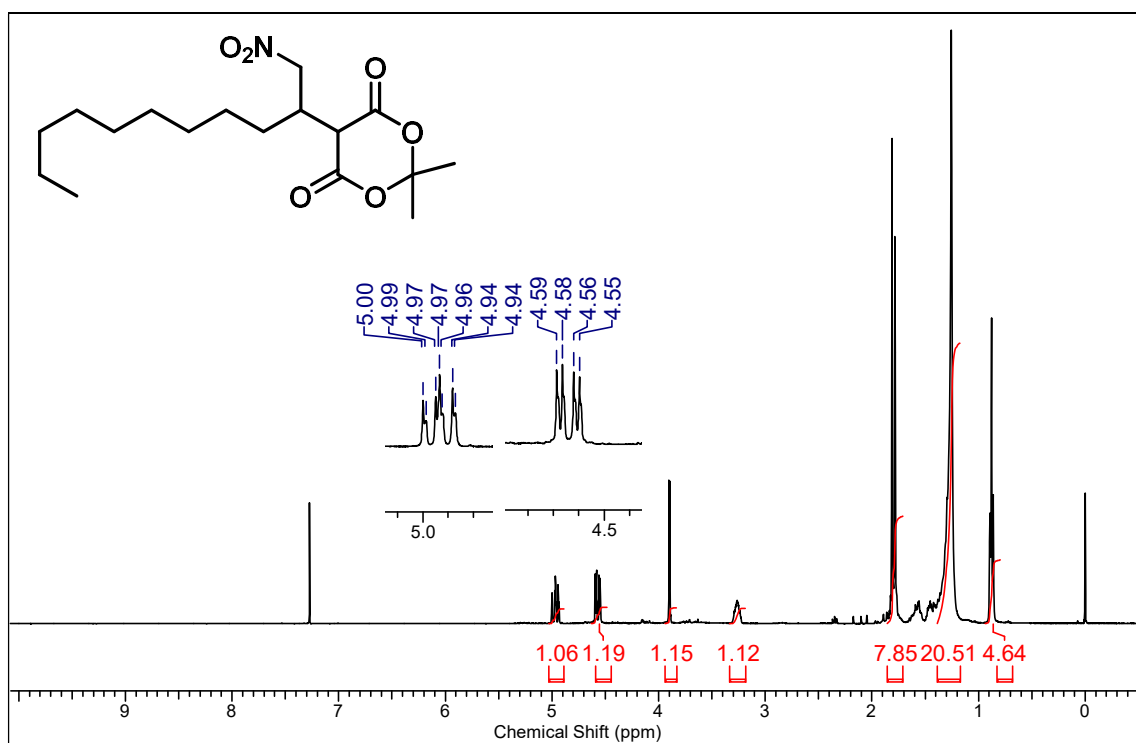

**Figure S28.** Spectrum of  $^1\text{H}$  NMR (300 MHz,  $\text{CDCl}_3$ ) of crude nitro adduct **10d**.

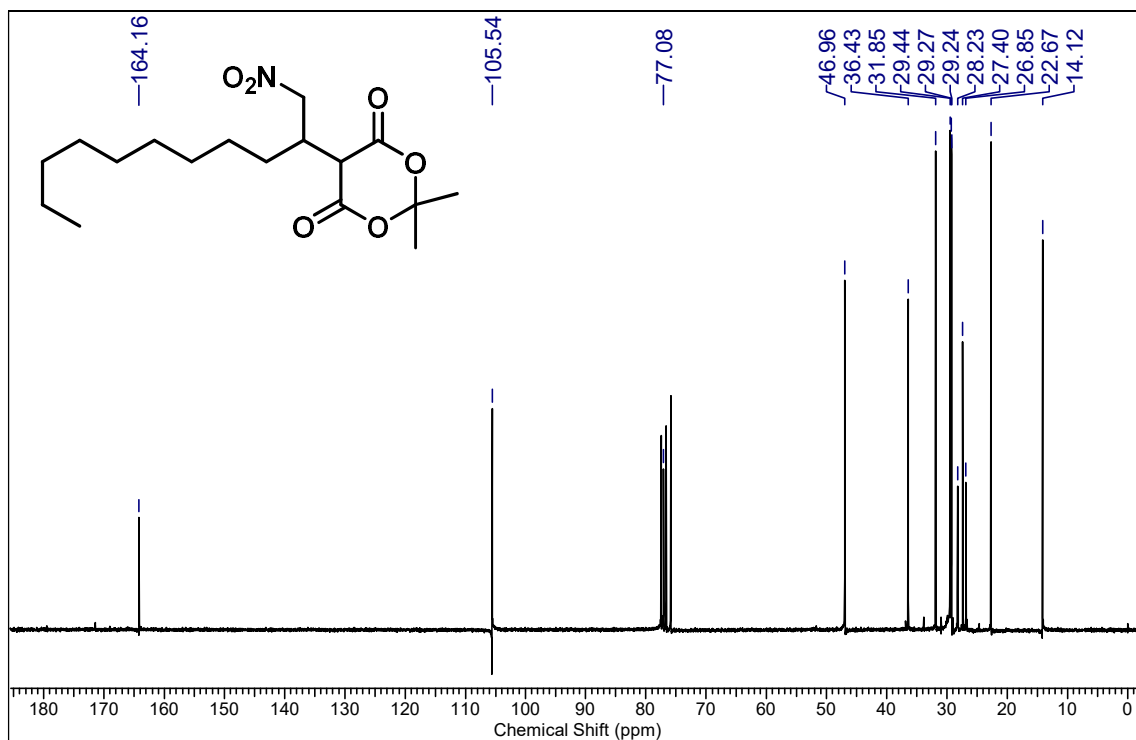

**Figure S29.** Spectrum of  $^{13}\text{C}$  NMR (75 MHz,  $\text{CDCl}_3$ ) of crude nitro adduct **10d**.

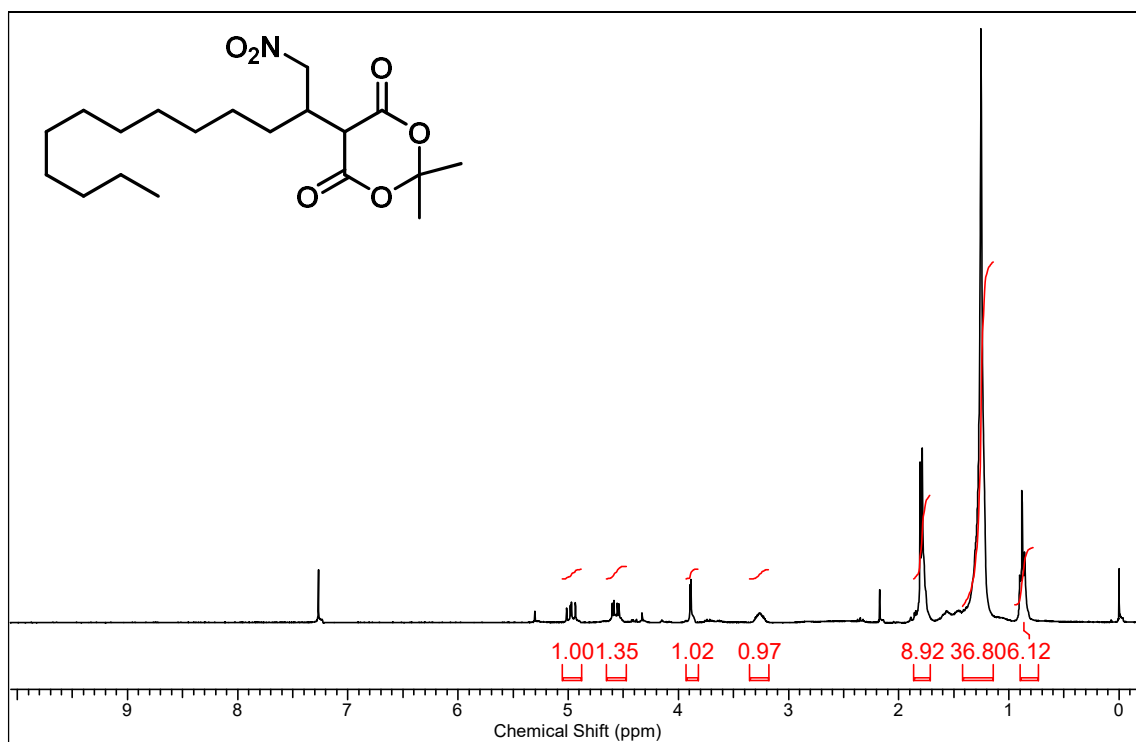

**Figure S30.** Spectrum of  $^1\text{H}$  NMR (300 MHz,  $\text{CDCl}_3$ ) of crude nitro adduct **10e**.



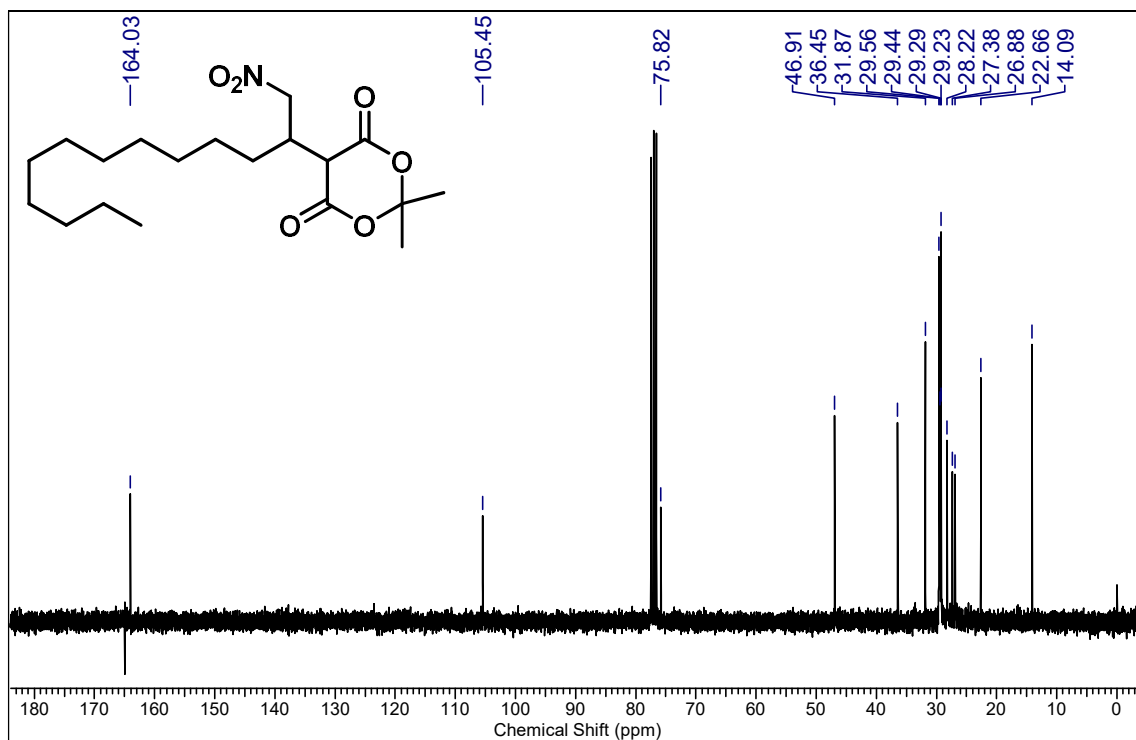

**Figure S31.** Spectrum of  $^{13}\text{C}$  NMR (75 MHz,  $\text{CDCl}_3$ ) of crude nitro adduct **10e**.

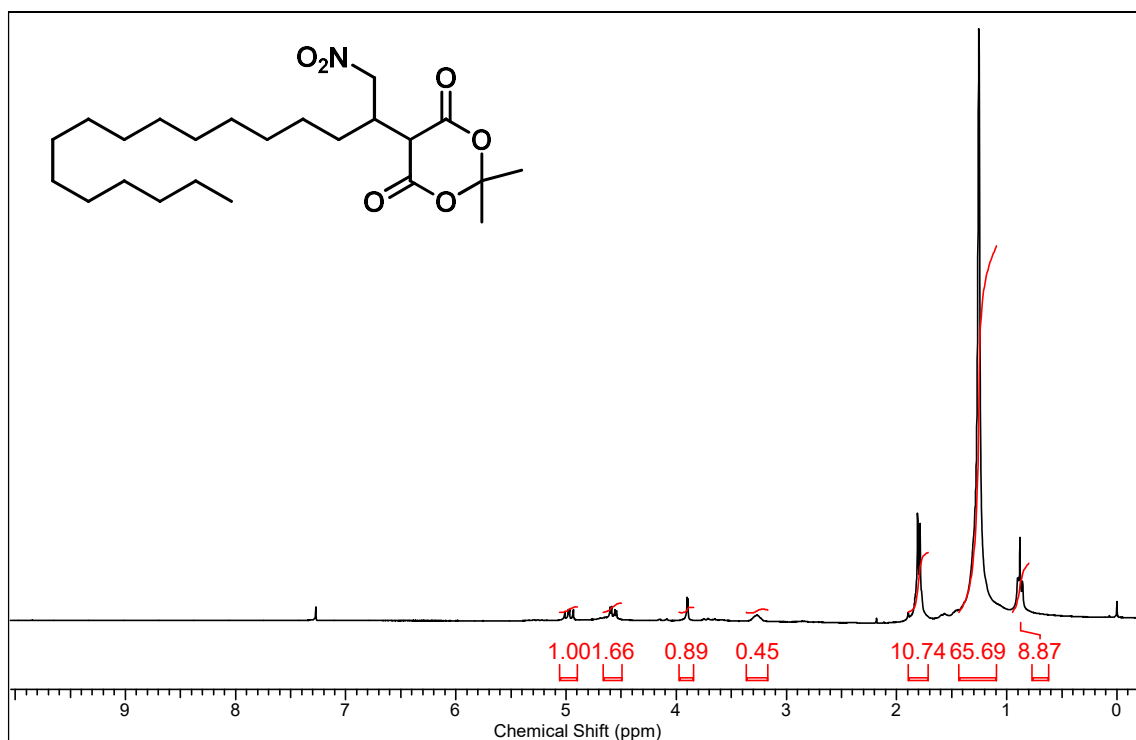

**Figure S32.** Spectrum of  $^1\text{H}$  NMR (300 MHz,  $\text{CDCl}_3$ ) of crude nitro adduct **10f**.

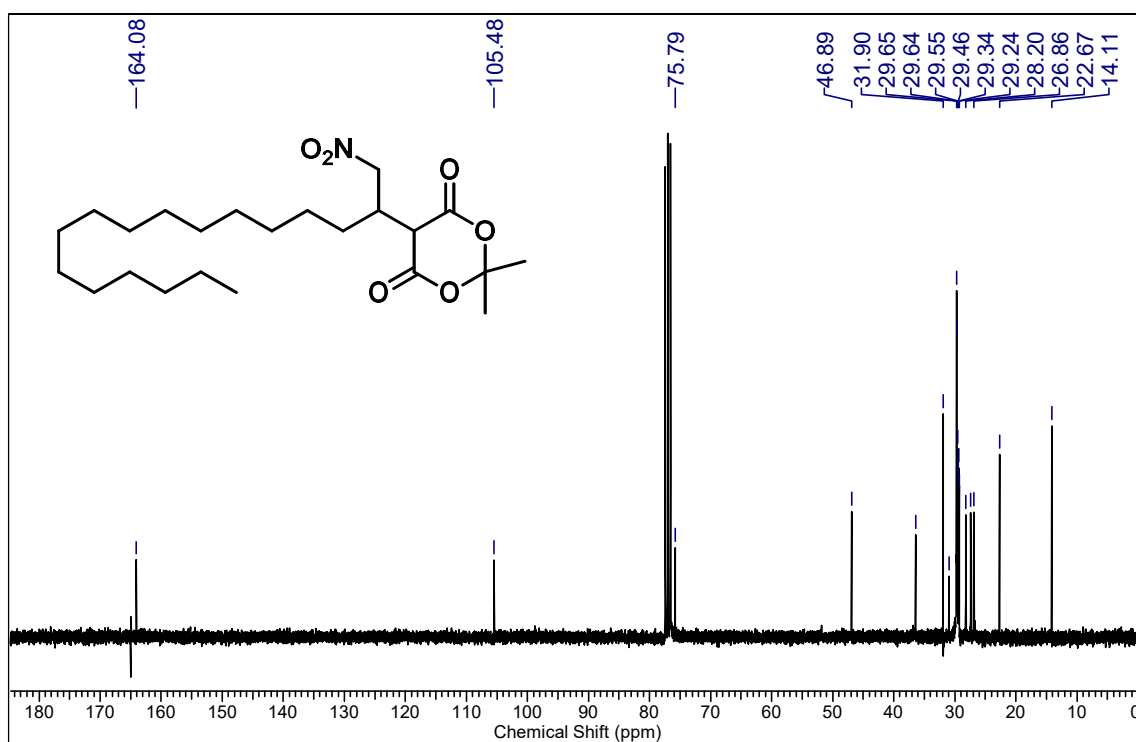

**Figure S33.** Spectrum of  $^{13}\text{C}$  NMR (75 MHz,  $\text{CDCl}_3$ ) of crude nitro adduct **10f**.

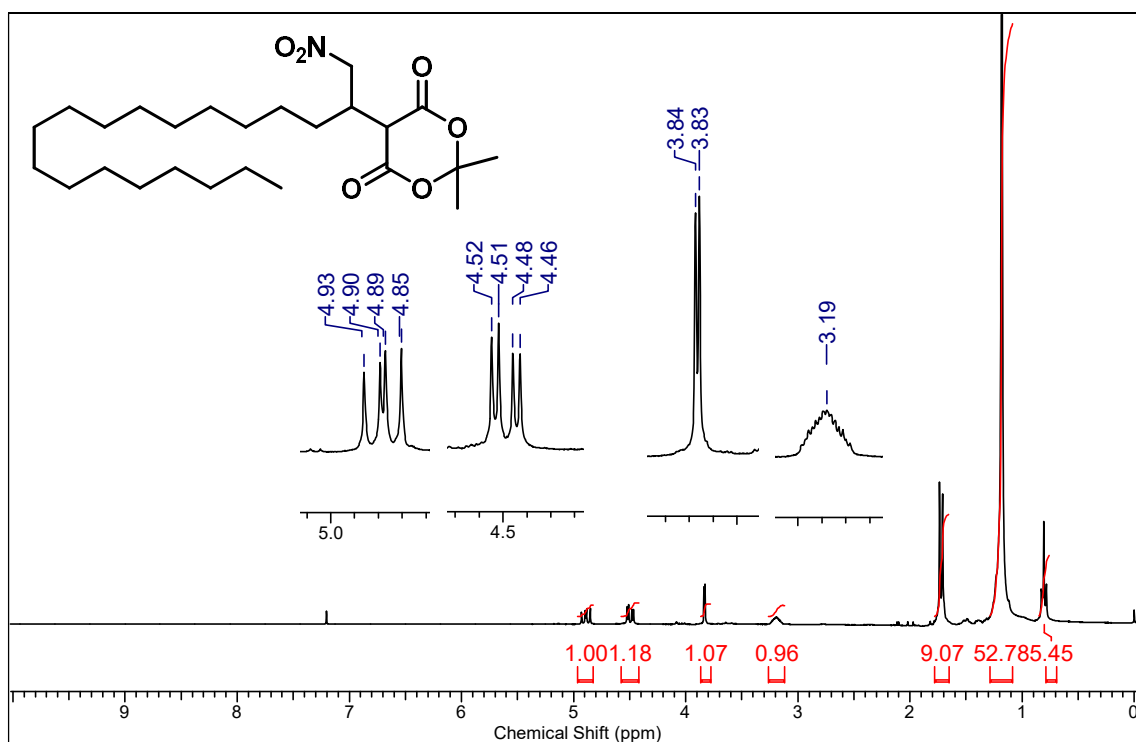

**Figure S34.** Spectrum of  $^1\text{H}$  NMR (300 MHz,  $\text{CDCl}_3$ ) of crude nitro adduct **10g**.

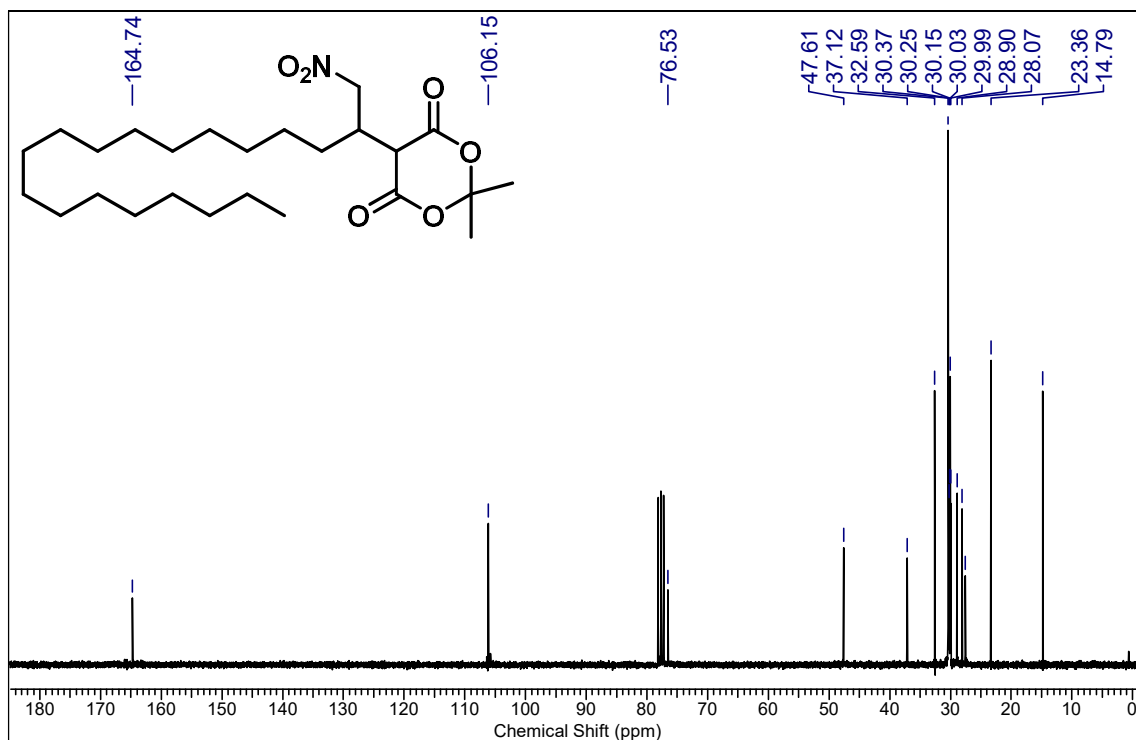

Figure S35. Spectrum of <sup>13</sup>C NMR (75 MHz, CDCl<sub>3</sub>) of crude nitro adduct **10g**.

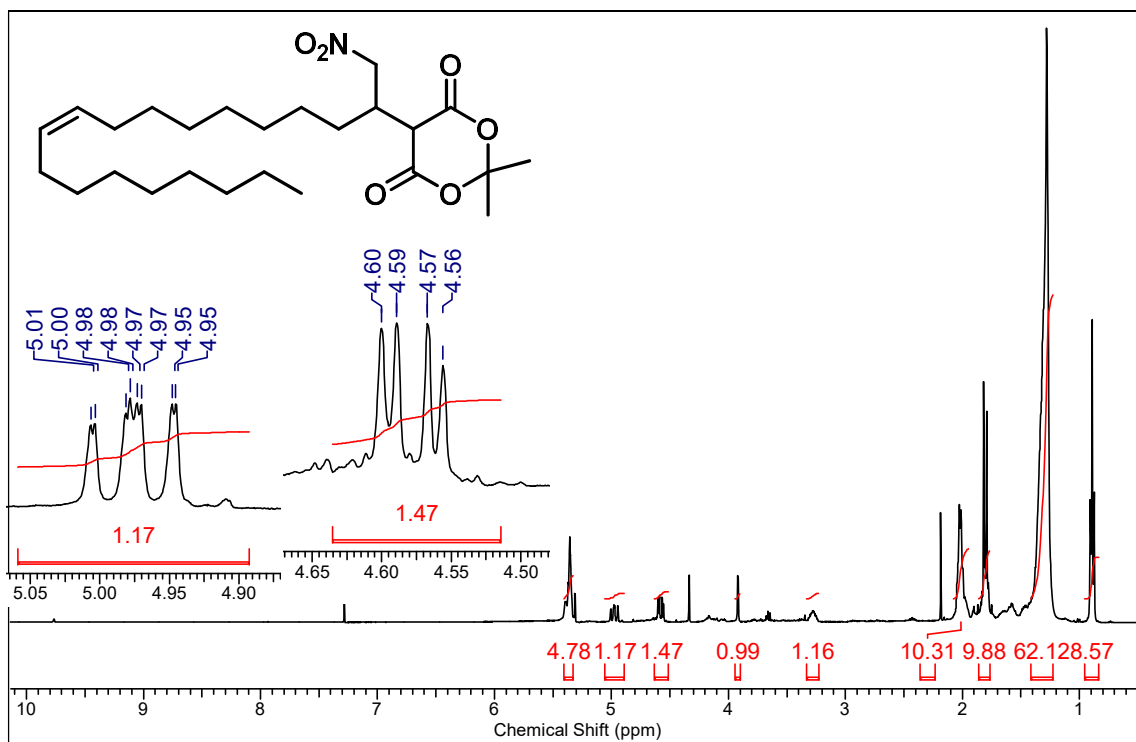

Figure S36. Spectrum of <sup>1</sup>H NMR (300 MHz, CDCl<sub>3</sub>) of crude nitro adduct **10h**.

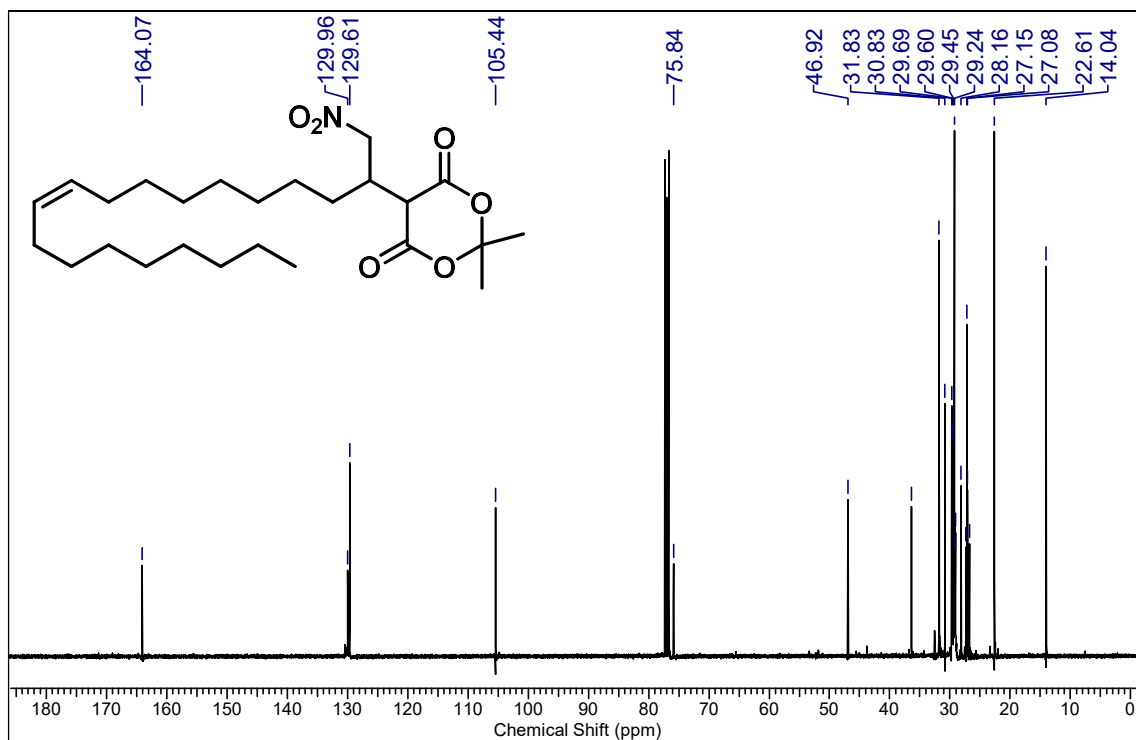

Figure S37. Spectrum of  $^{13}\text{C}$  NMR (75 MHz,  $\text{CDCl}_3$ ) of crude nitro adduct **10h**.

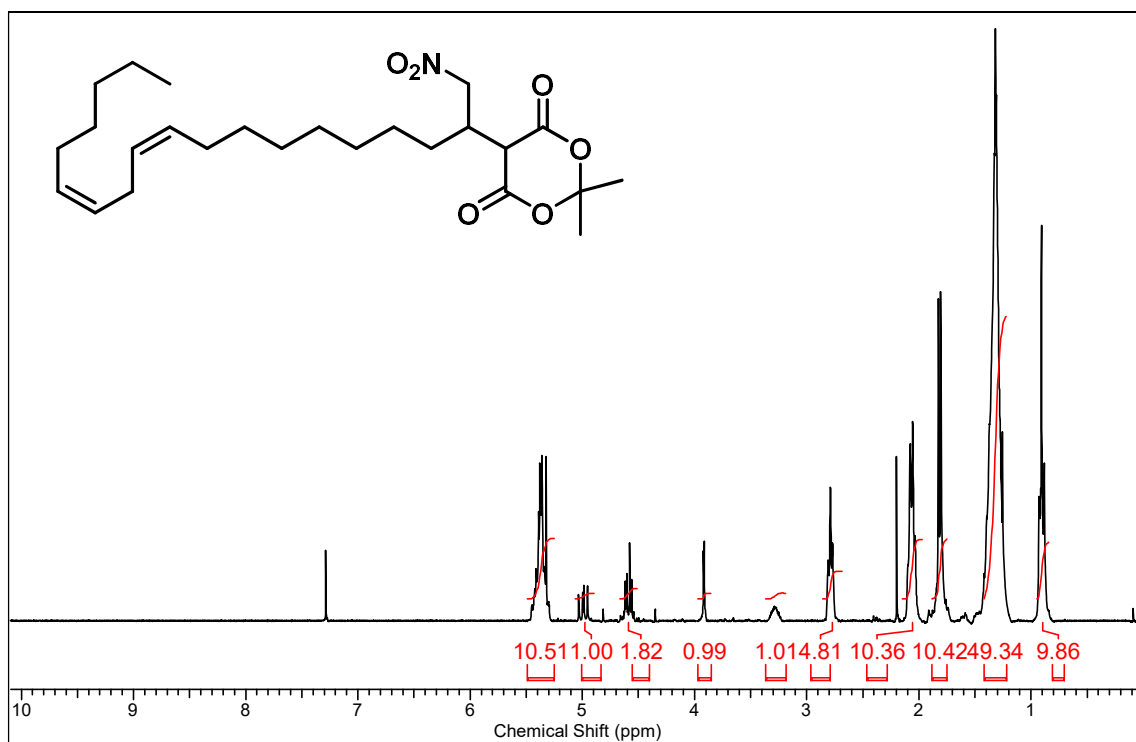

Figure S38. Spectrum of  $^1\text{H}$  NMR (300 MHz,  $\text{CDCl}_3$ ) of crude nitro adduct **10i**.

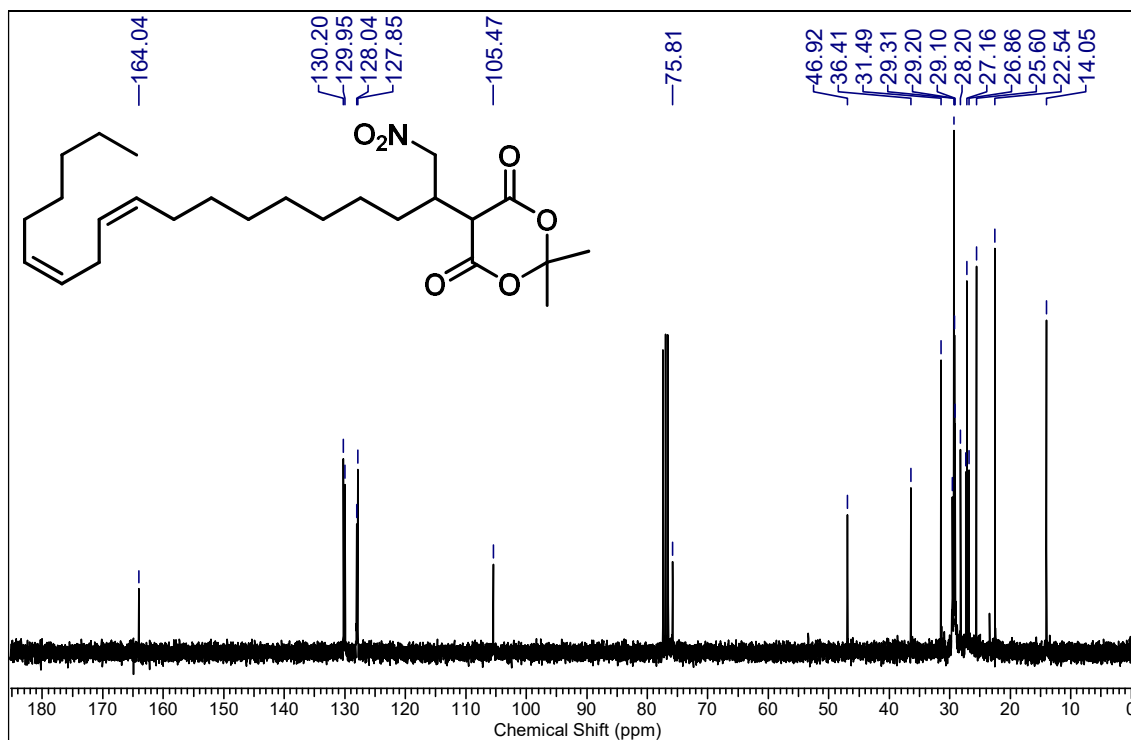

**Figure S39.** Spectrum of  $^{13}\text{C}$  NMR (75 MHz,  $\text{CDCl}_3$ ) of crude nitro adduct **10i**.

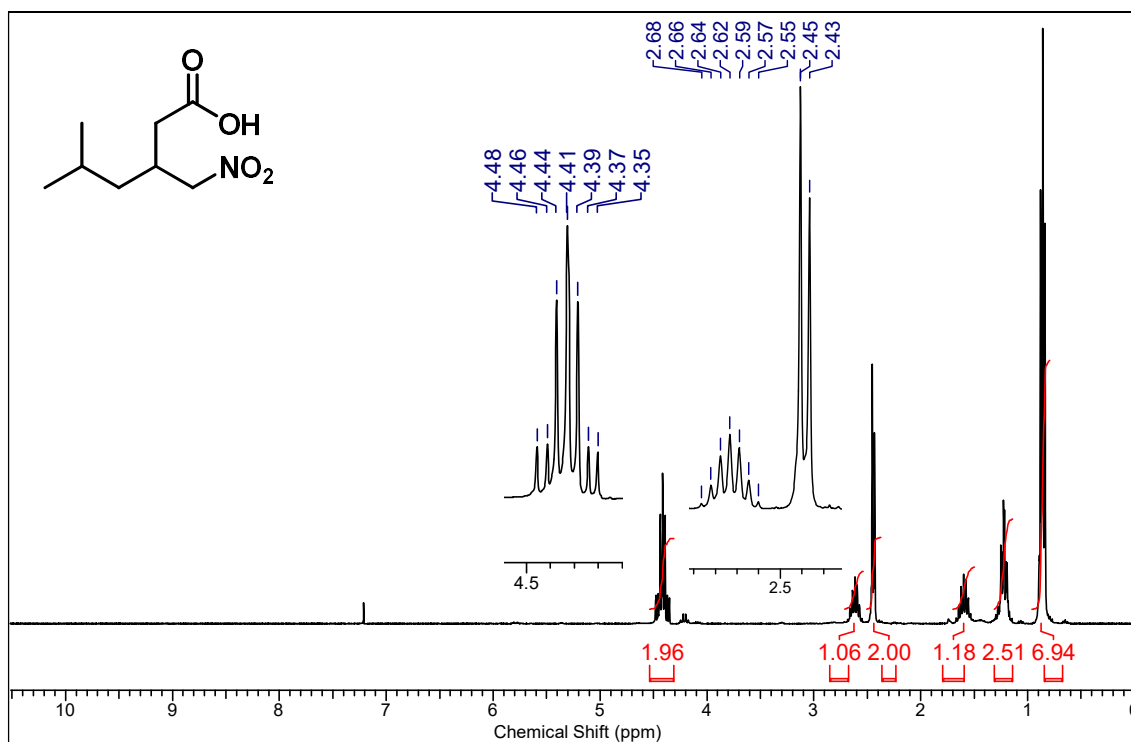

**Figure S40.** Spectrum of  $^1\text{H}$  NMR (300 MHz,  $\text{CDCl}_3$ ) of  $\gamma$ -nitro acid **11a**.

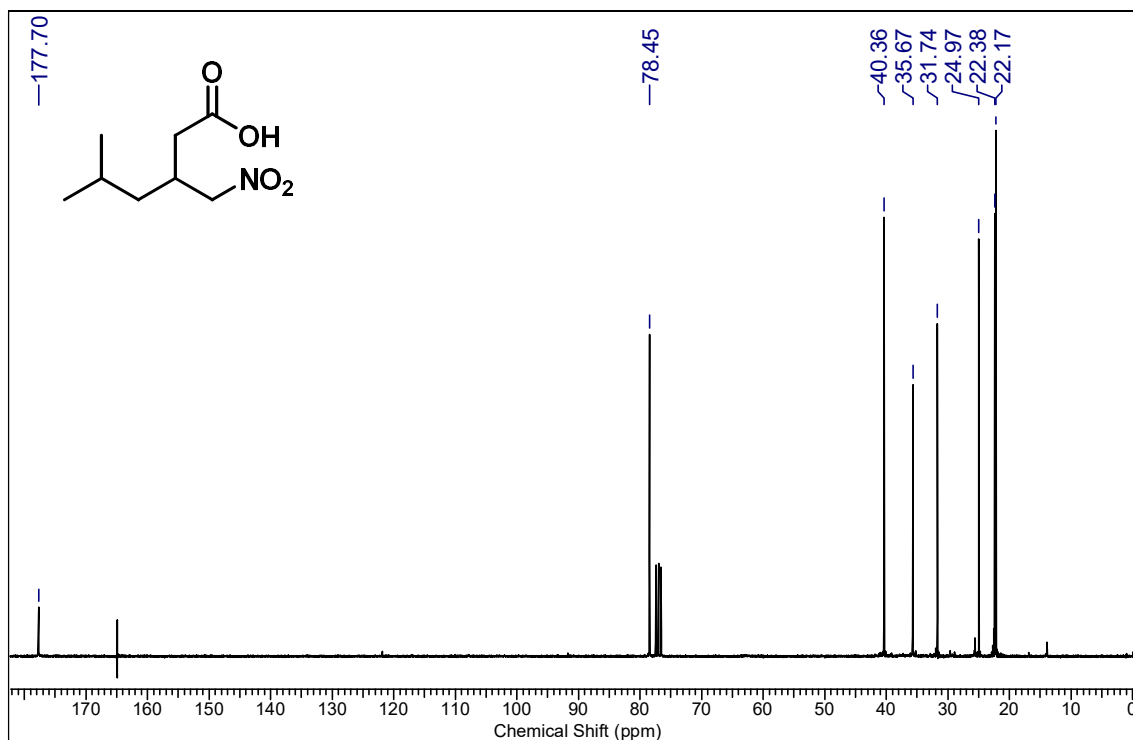

Figure S41. Spectrum of  $^{13}\text{C}$  NMR (75 MHz,  $\text{CDCl}_3$ ) of  $\gamma$ -nitro acid **11a**.

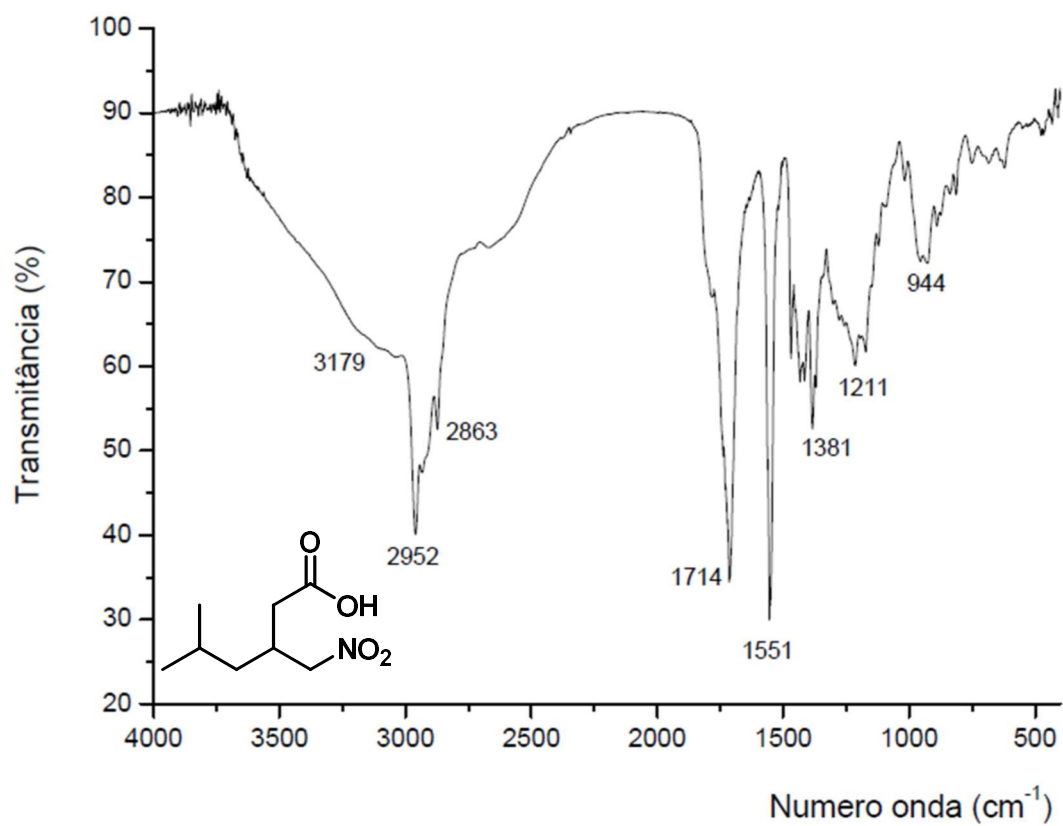

Figure S42. Spectrum of IR (NaCl) of  $\gamma$ -nitro acid **11a**.

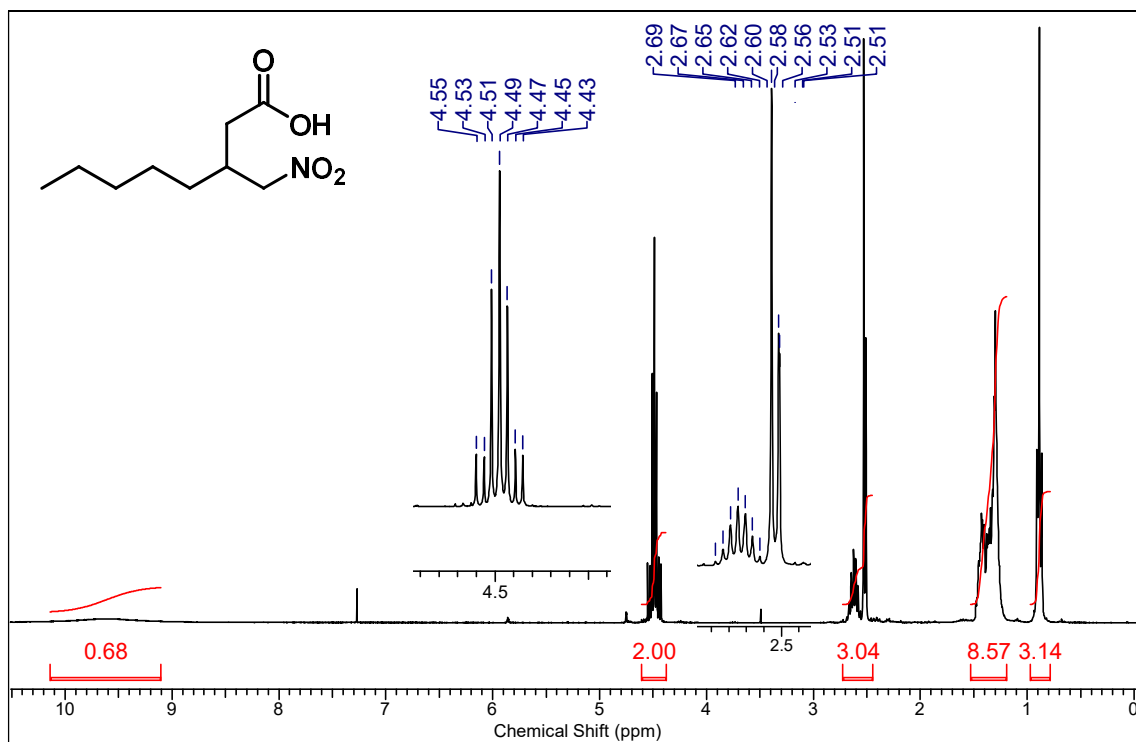

Figure S43. Spectrum of  $^1\text{H NMR}$  (300 MHz,  $\text{CDCl}_3$ ) of  $\gamma$ -nitro acid **11b**.

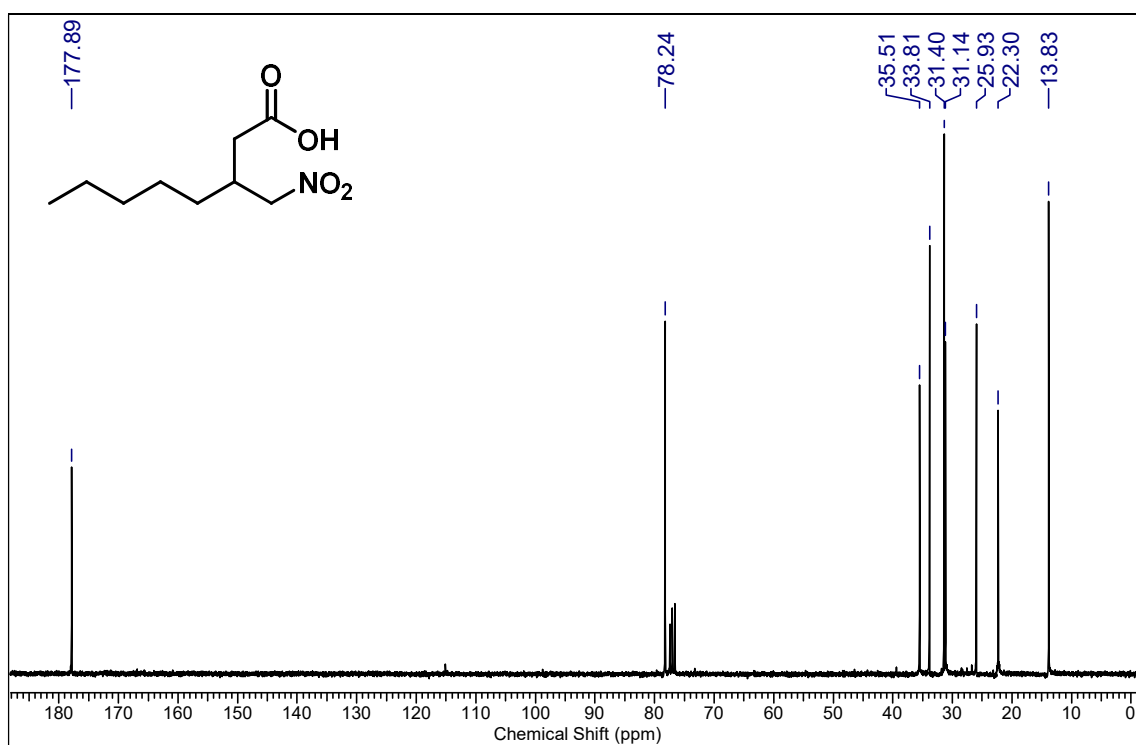

Figure S44. Spectrum of  $^{13}\text{C NMR}$  (75 MHz,  $\text{CDCl}_3$ ) of  $\gamma$ -nitro acid **11b**.

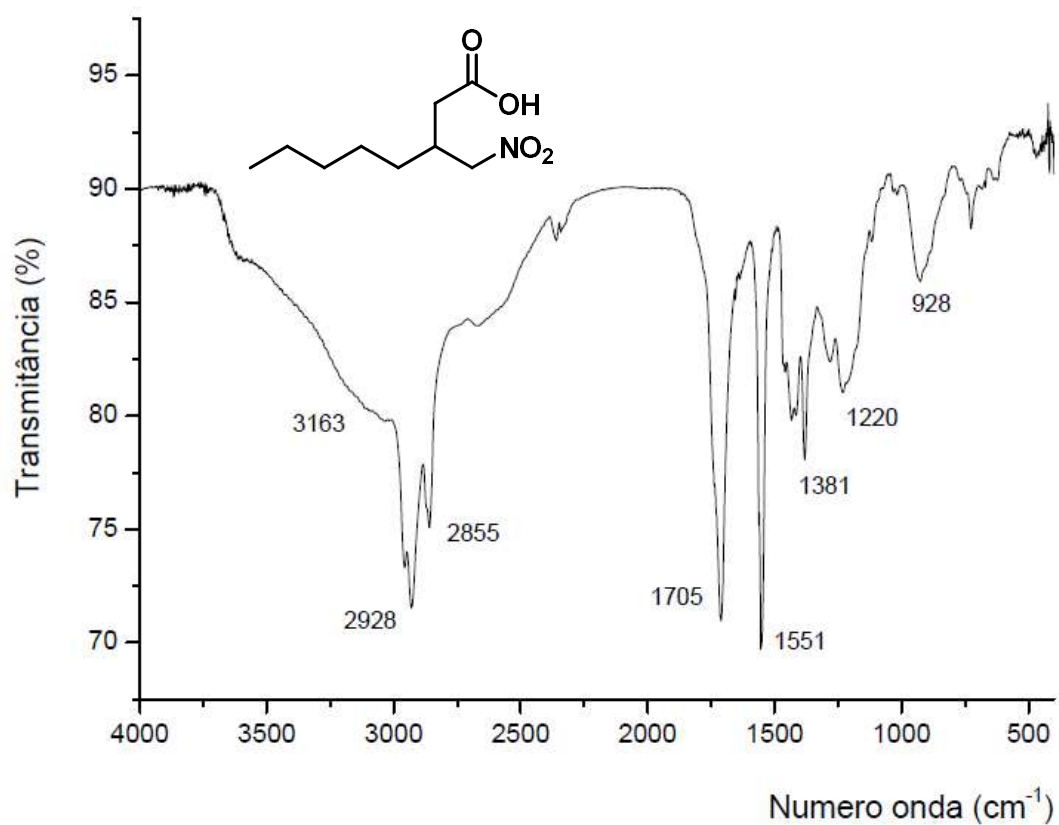

Figure S45. Spectrum of IR (NaCl) of  $\gamma$ -nitro acid **11b**.

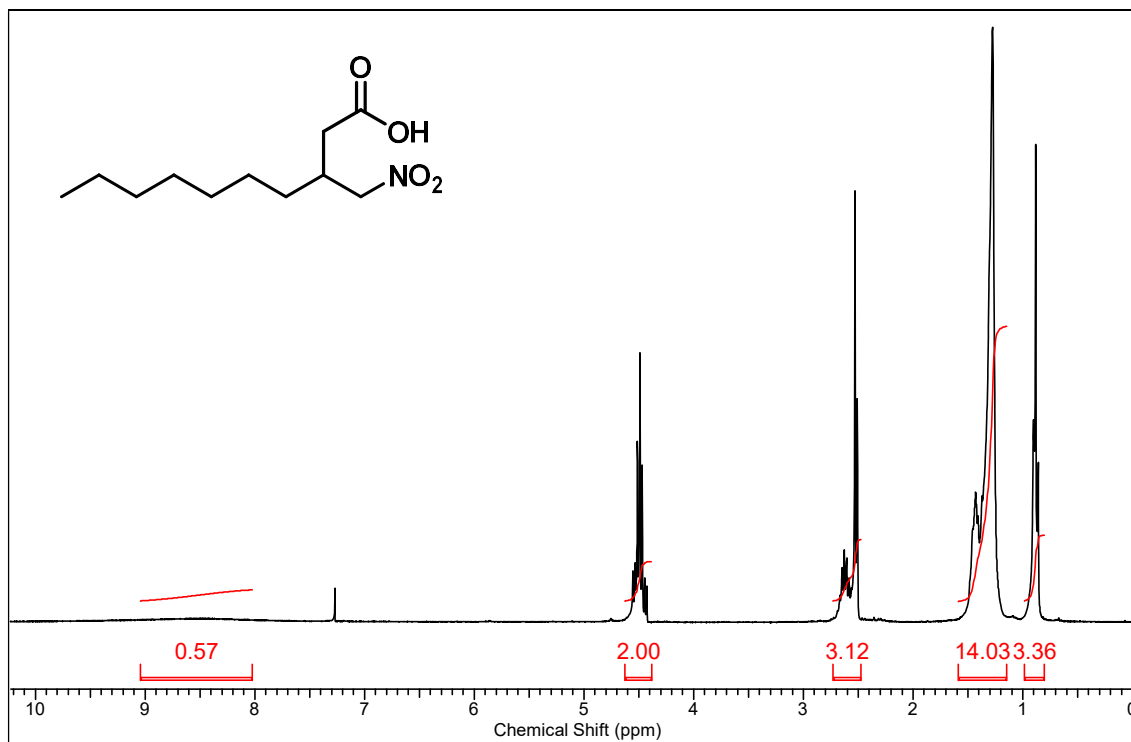

Figure S46. Spectrum of  $^1\text{H}$  NMR (300 MHz,  $\text{CDCl}_3$ ) of  $\gamma$ -nitro acid **11c**.



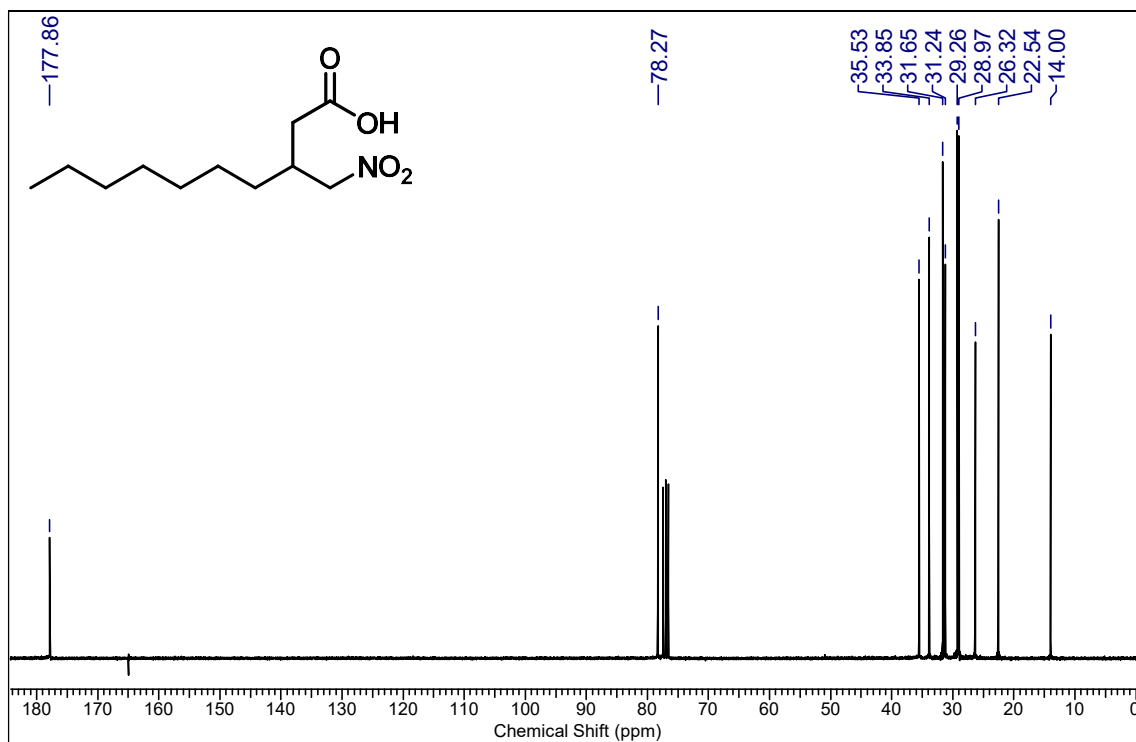

Figure S47. Spectrum of  $^{13}\text{C}$  NMR (75 MHz,  $\text{CDCl}_3$ ) of  $\gamma$ -nitro acid **11c**.

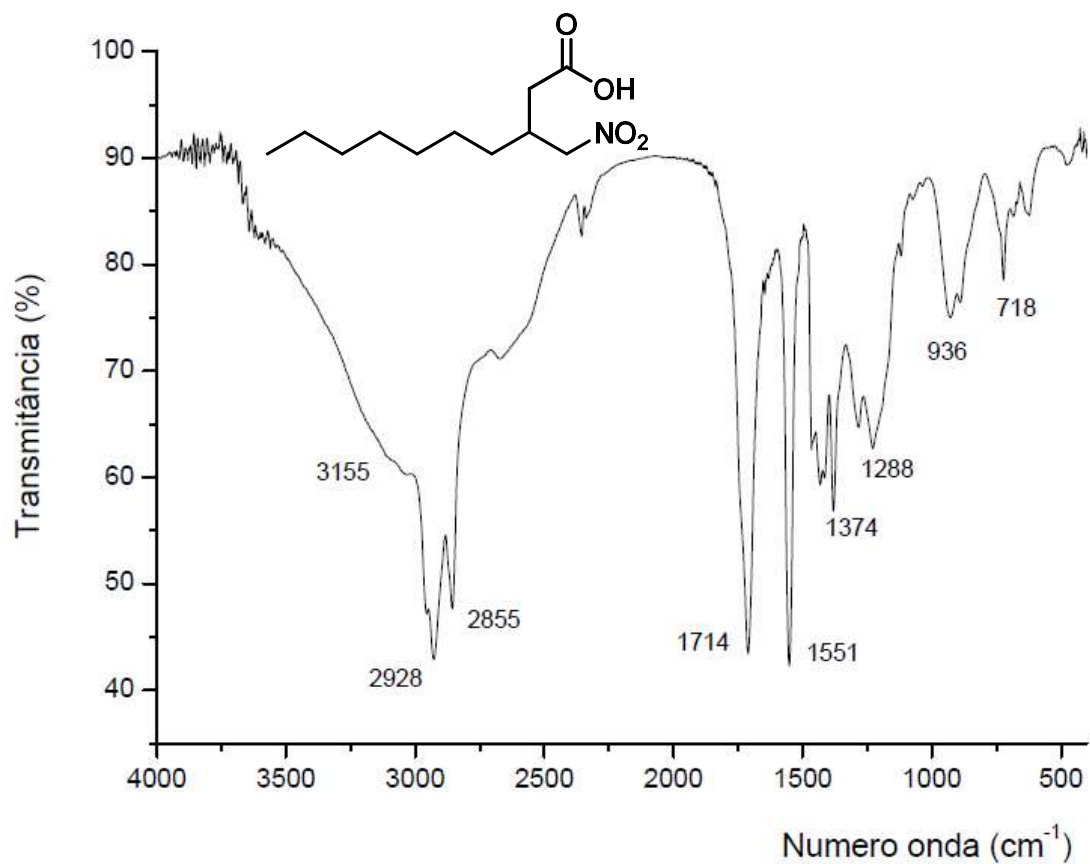

Figure S48. Spectrum of IR (NaCl) of  $\gamma$ -nitro acid **11c**.

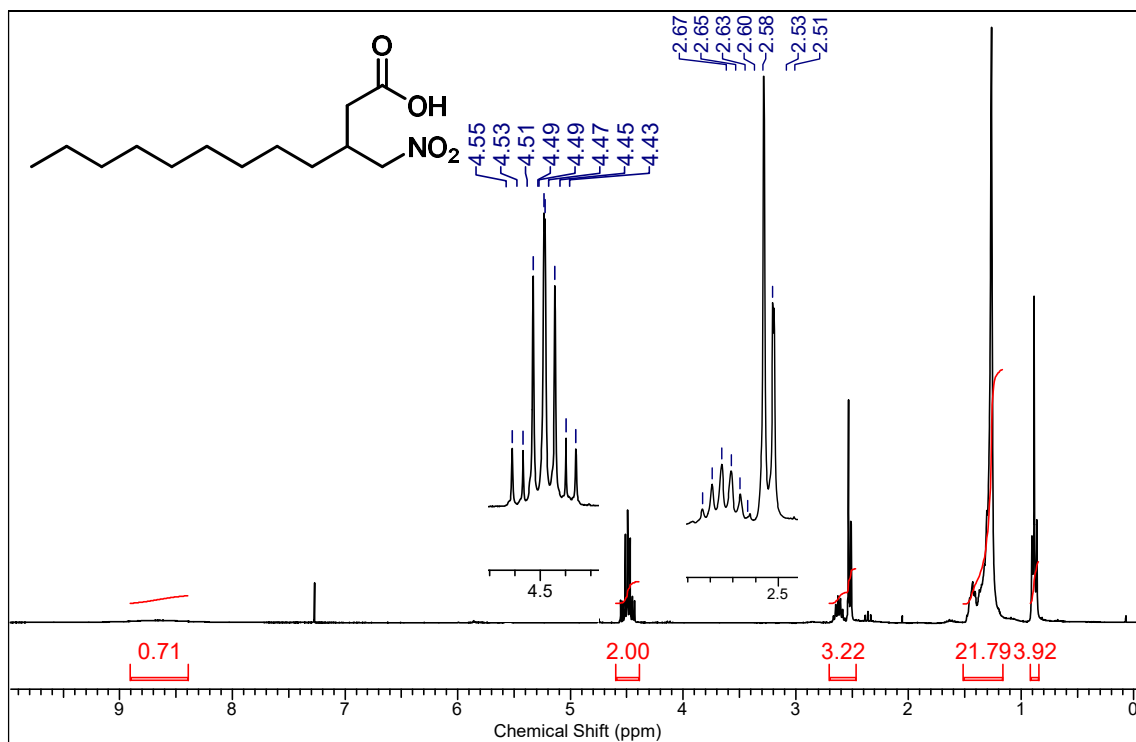

**Figure S49.** Spectrum of  $^1\text{H NMR}$  (300 MHz,  $\text{CDCl}_3$ ) of  $\gamma$ -nitro acid **11d**.

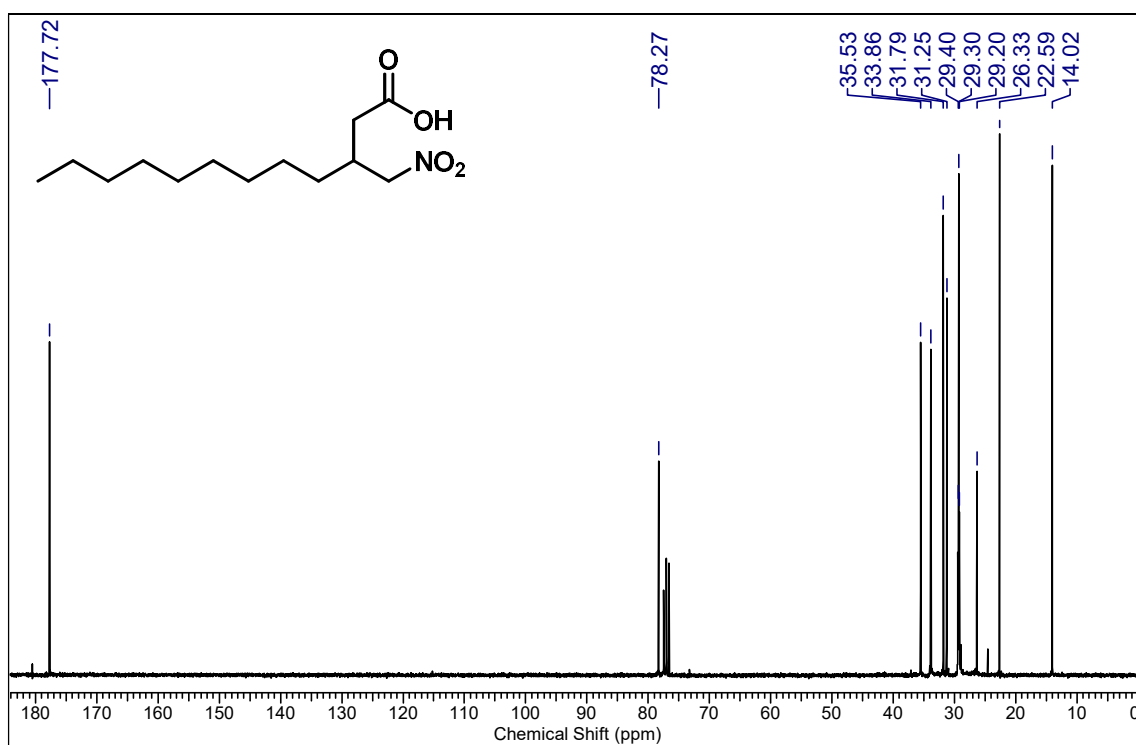

**Figure S50.** Spectrum of  $^{13}\text{C NMR}$  (75 MHz,  $\text{CDCl}_3$ ) of  $\gamma$ -nitro acid **11d**.

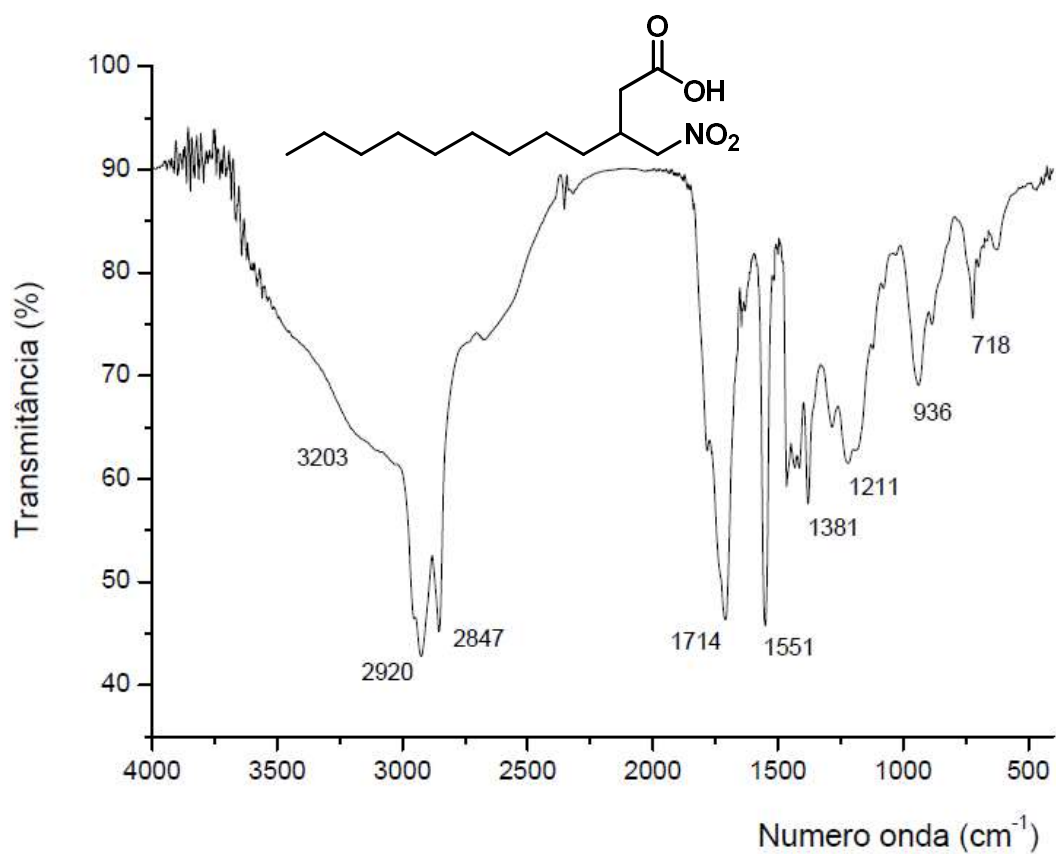

Figure S51. Spectrum of IR (NaCl) of  $\gamma$ -nitro acid **11d**.

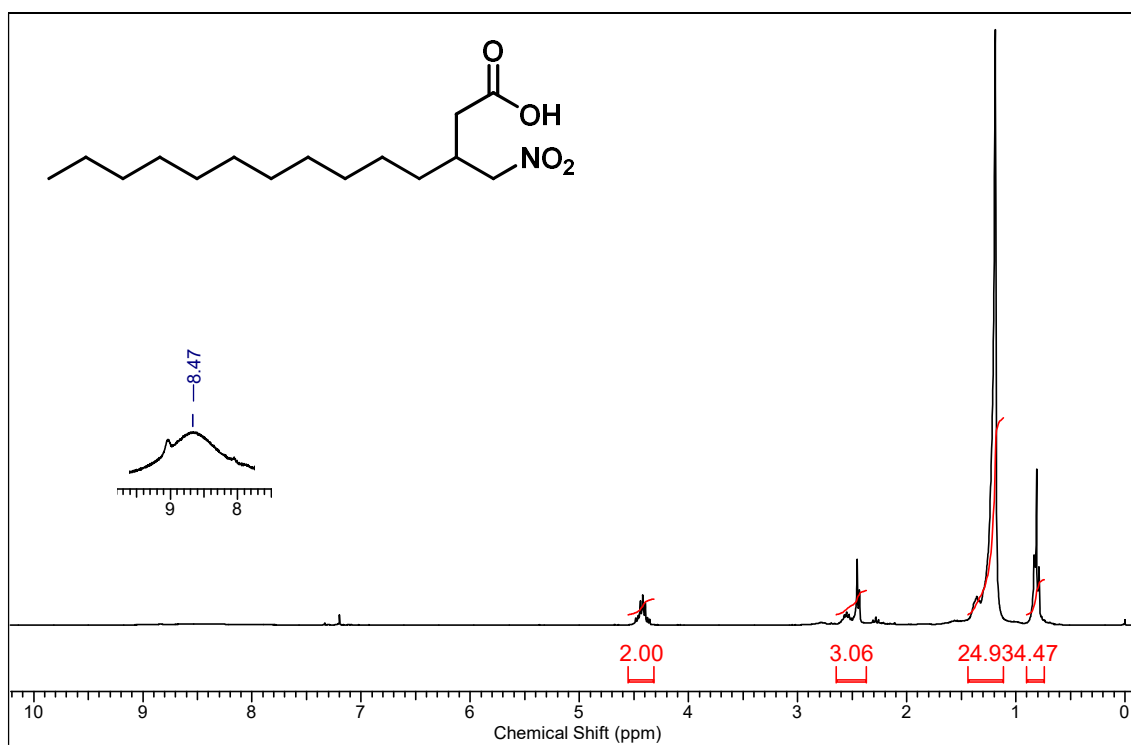

Figure S52. Spectrum of  $^1\text{H}$  NMR (300 MHz,  $\text{CDCl}_3$ ) of  $\gamma$ -nitro acid **11e**.

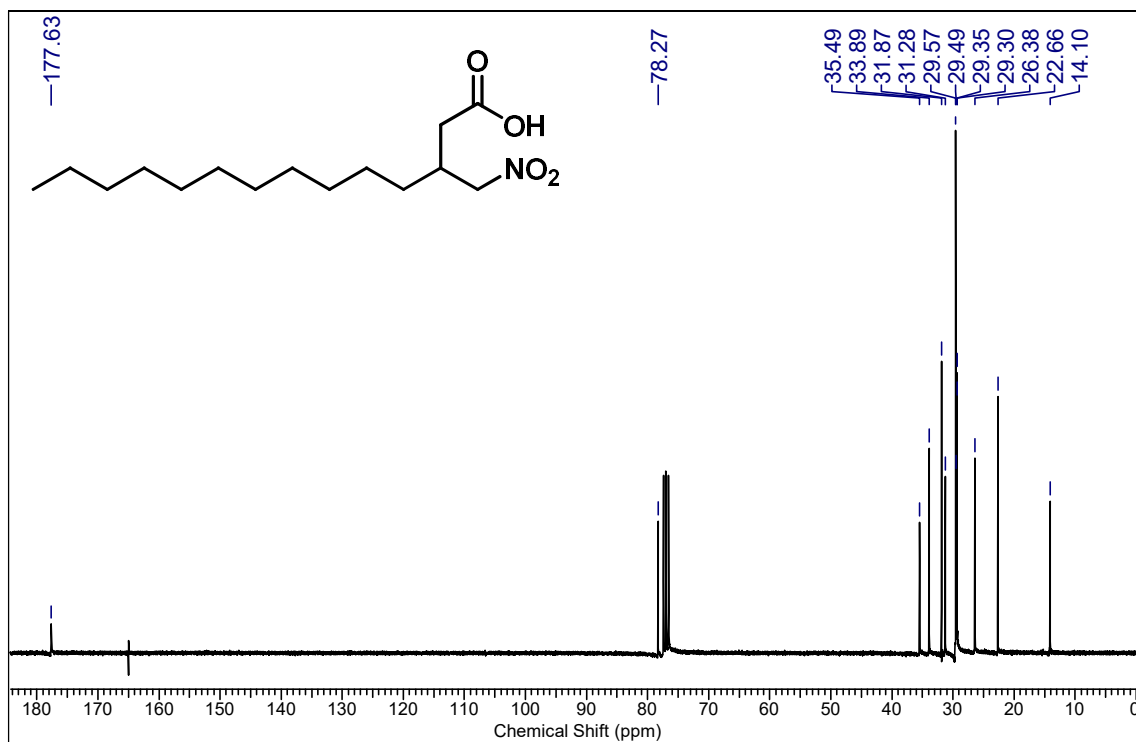

**Figure S53.** Spectrum of  $^{13}\text{C}$  NMR (75 MHz,  $\text{CDCl}_3$ ) of  $\gamma$ -nitro acid **11e**.

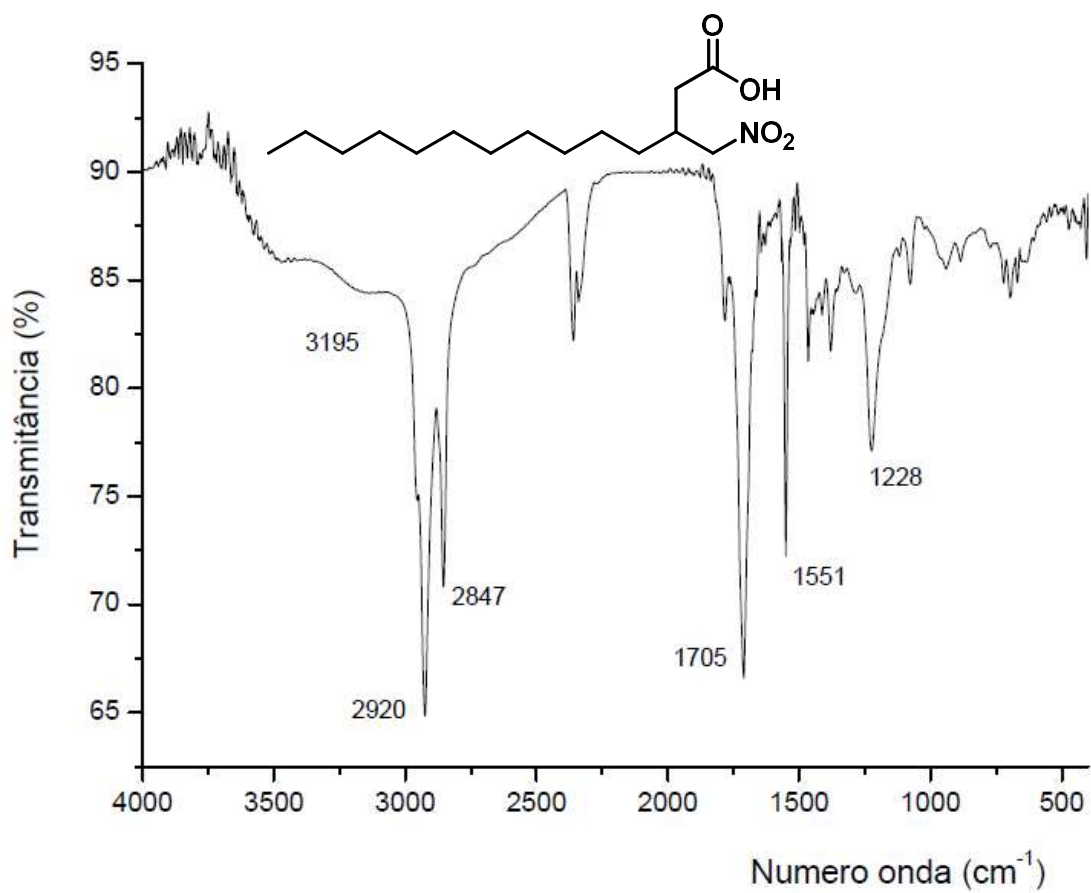

**Figure S54.** Spectrum of IR (NaCl) of  $\gamma$ -nitro acid **11e**.

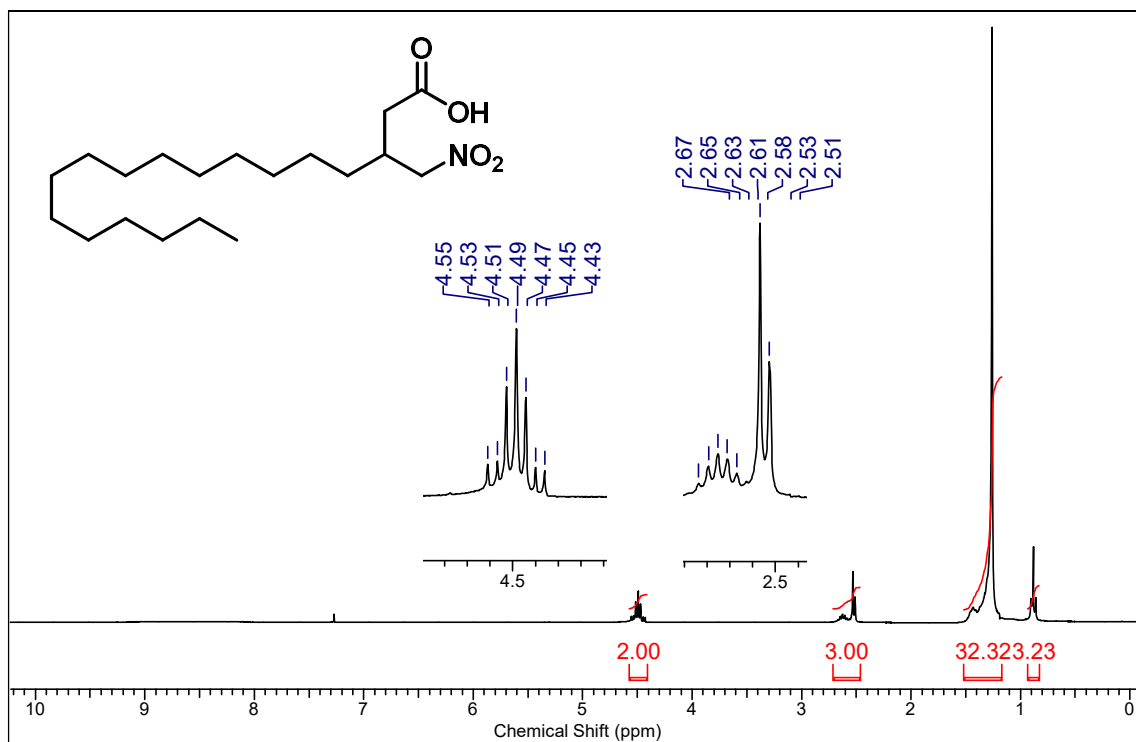

Figure S55. Spectrum of  $^1\text{H}$  NMR (300 MHz,  $\text{CDCl}_3$ ) of  $\gamma$ -nitro acid **11f**.

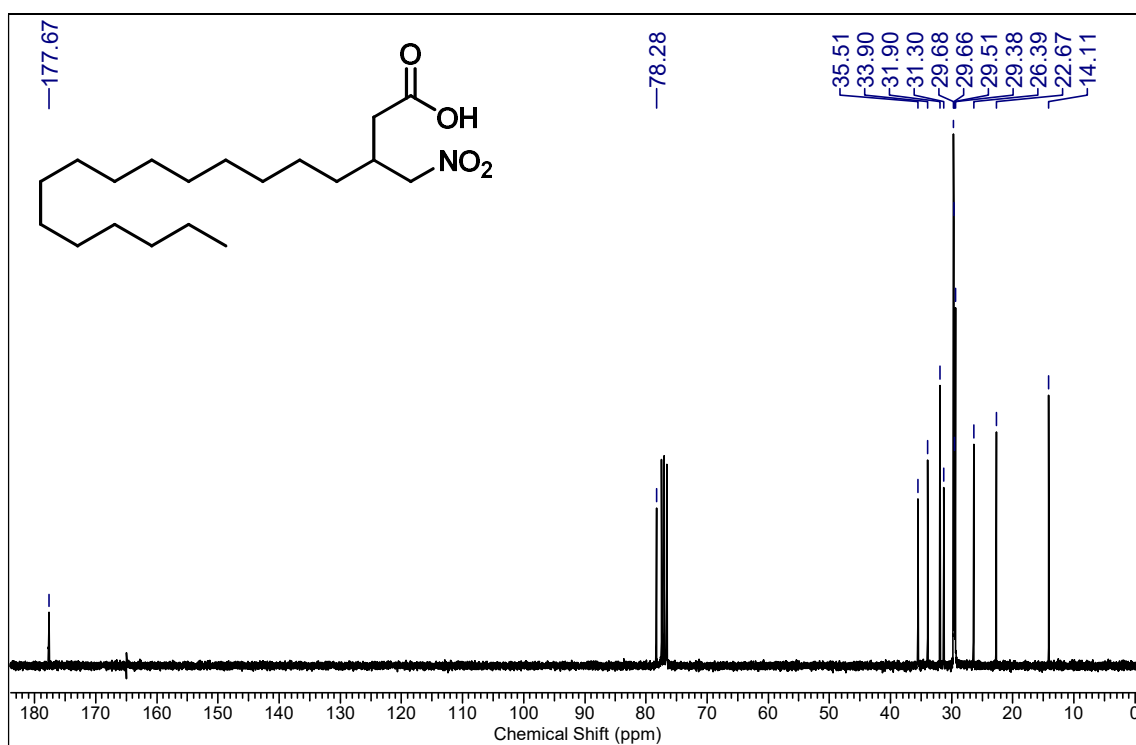

Figure S56. Spectrum of  $^{13}\text{C}$  NMR (75 MHz,  $\text{CDCl}_3$ ) of  $\gamma$ -nitro acid **11f**.

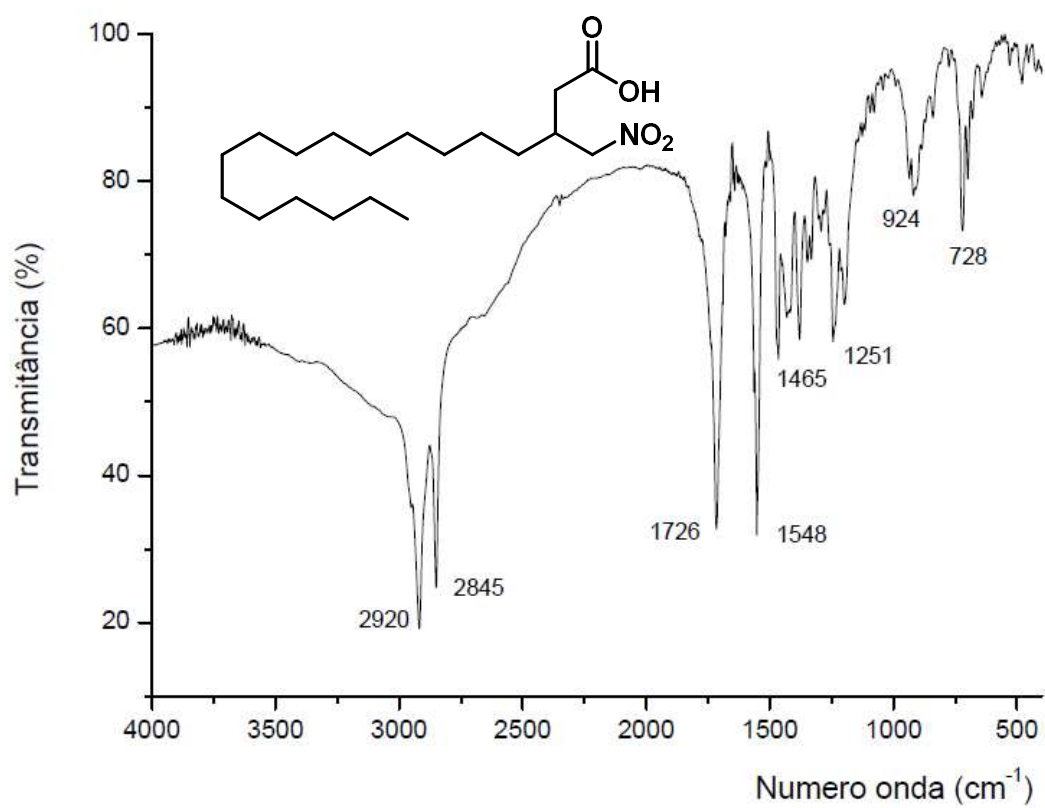

Figure S57. Spectrum of IR (NaCl) of  $\gamma$ -nitro acid **11f**.

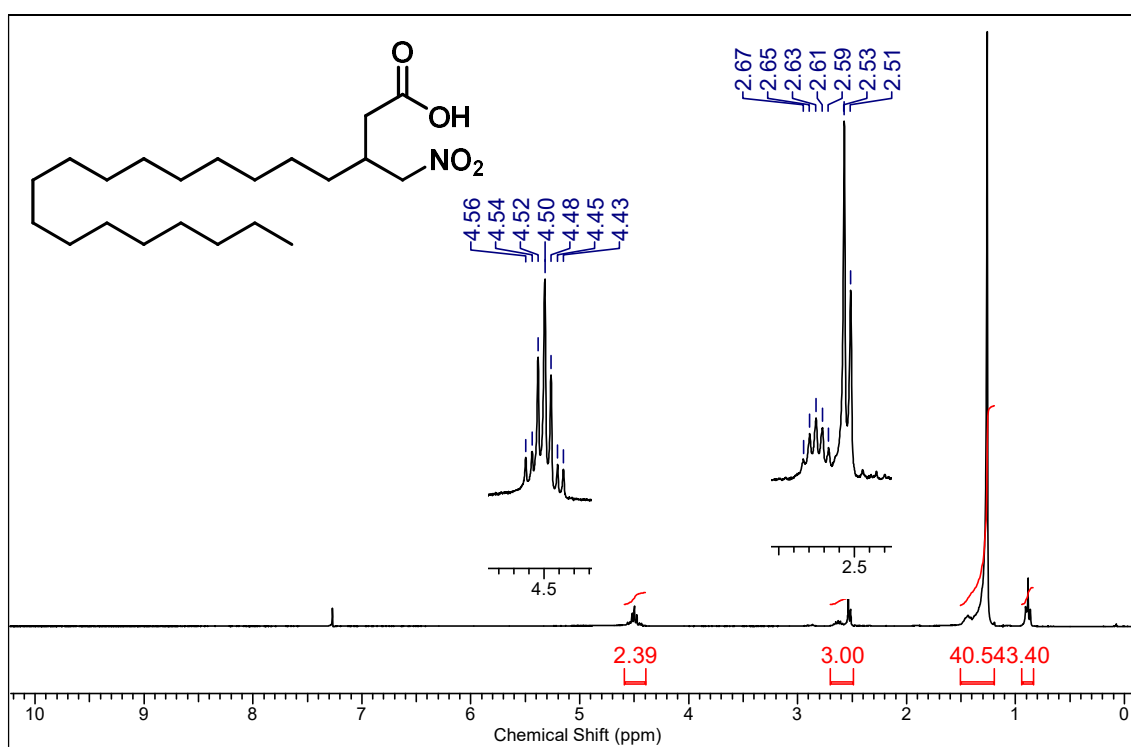

Figure S58. Spectrum of  $^1\text{H}$  NMR (300 MHz,  $\text{CDCl}_3$ ) of  $\gamma$ -nitro acid **11g**.

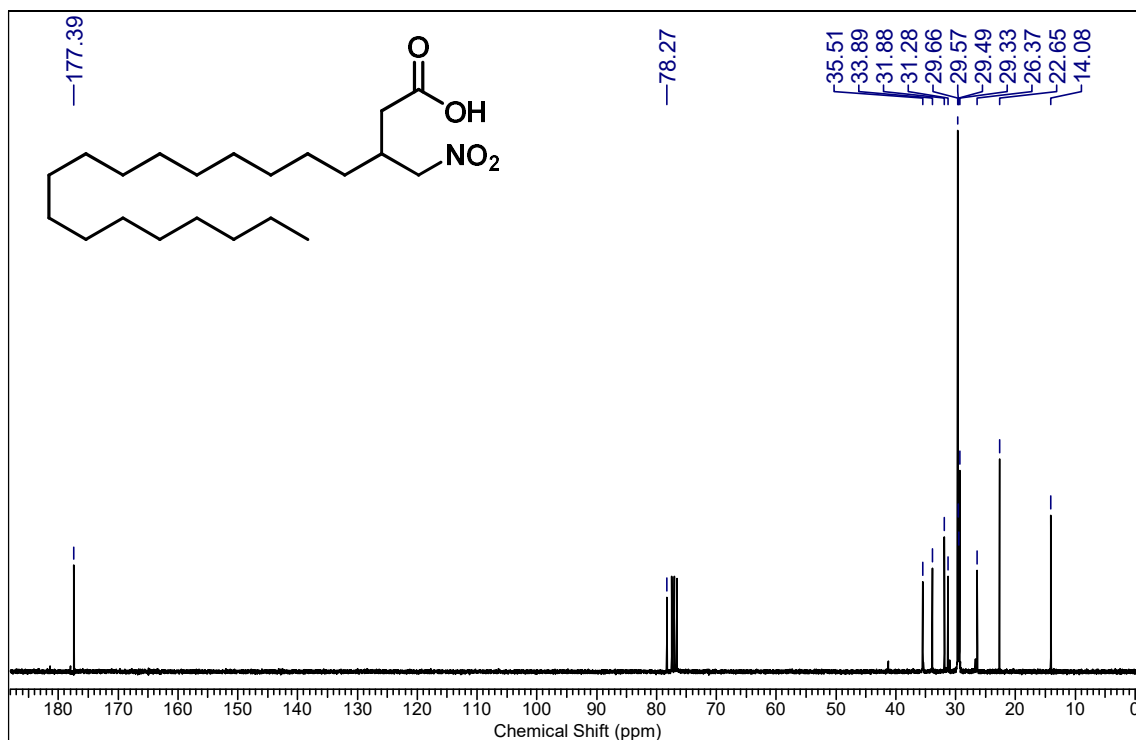

**Figure S59.** Spectrum of  $^{13}\text{C}$  NMR (75 MHz,  $\text{CDCl}_3$ ) of  $\gamma$ -nitro acid **11g**.

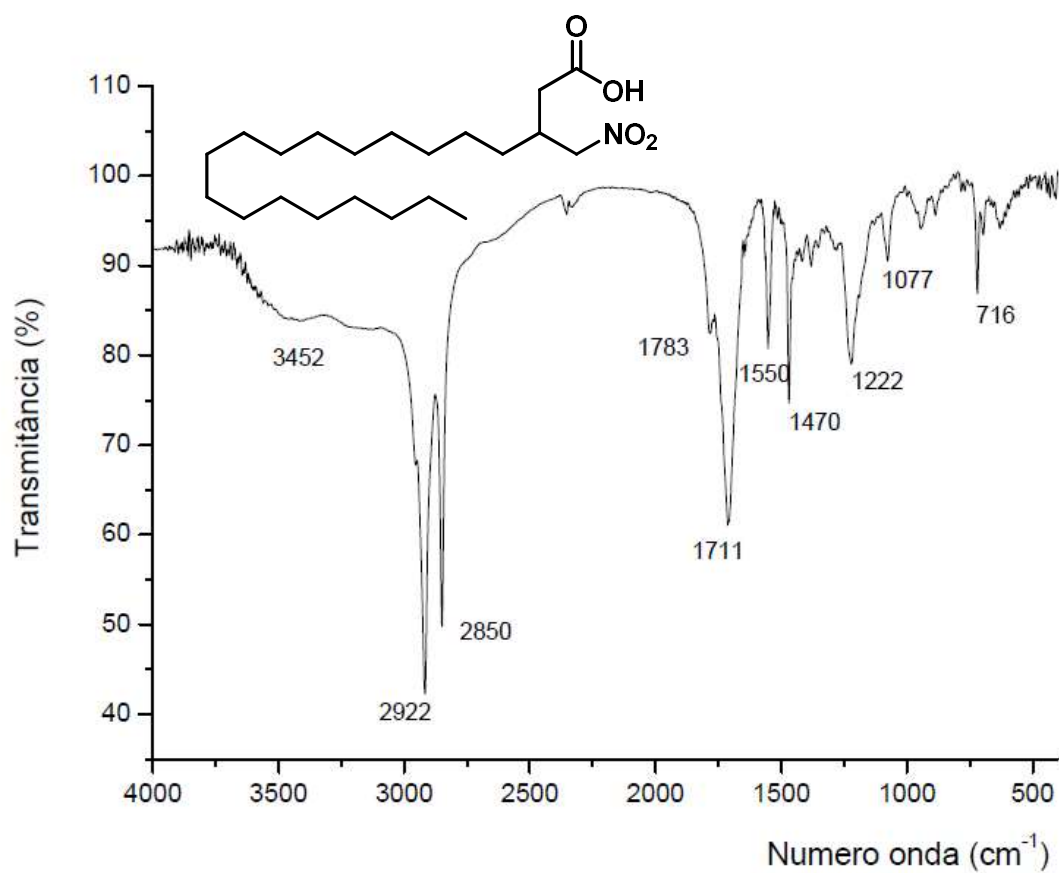

**Figure S60.** Spectrum of IR (NaCl) of  $\gamma$ -nitro acid **11g**.

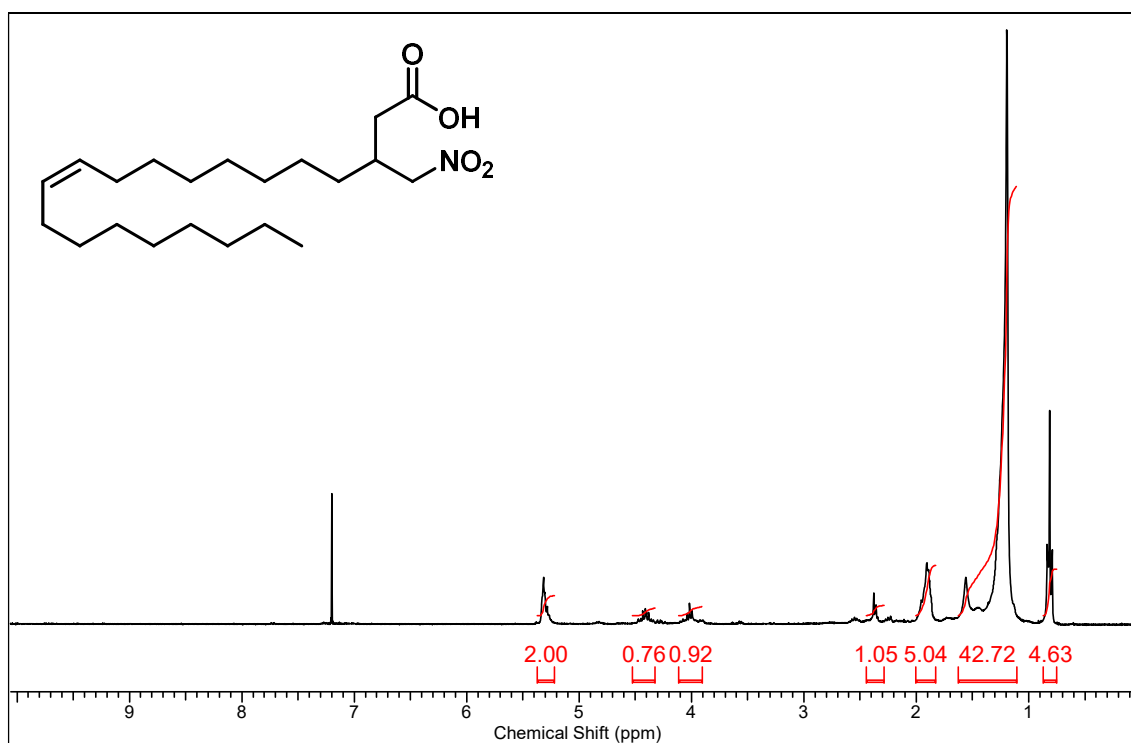

**Figure S61.** Spectrum of  $^1\text{H}$  NMR (300 MHz,  $\text{CDCl}_3$ ) of  $\gamma$ -nitro acid **11h**.

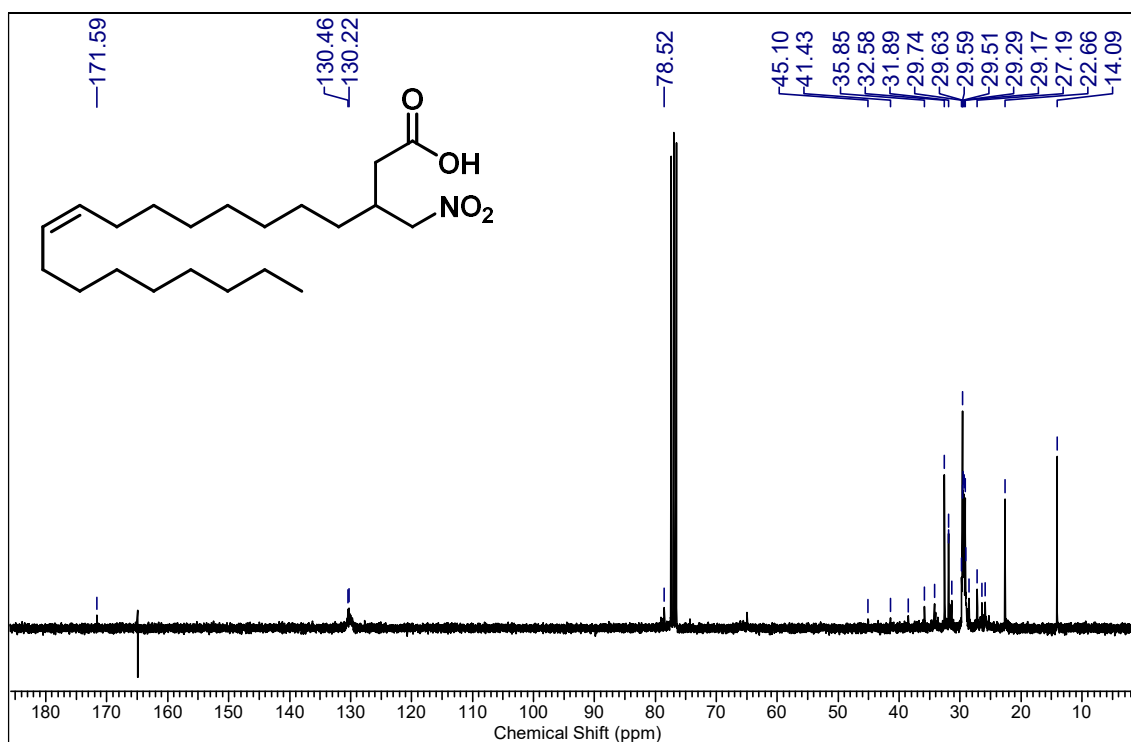

**Figure S62.** Spectrum of  $^{13}\text{C}$  NMR (75 MHz,  $\text{CDCl}_3$ ) of  $\gamma$ -nitro acid **11h**.



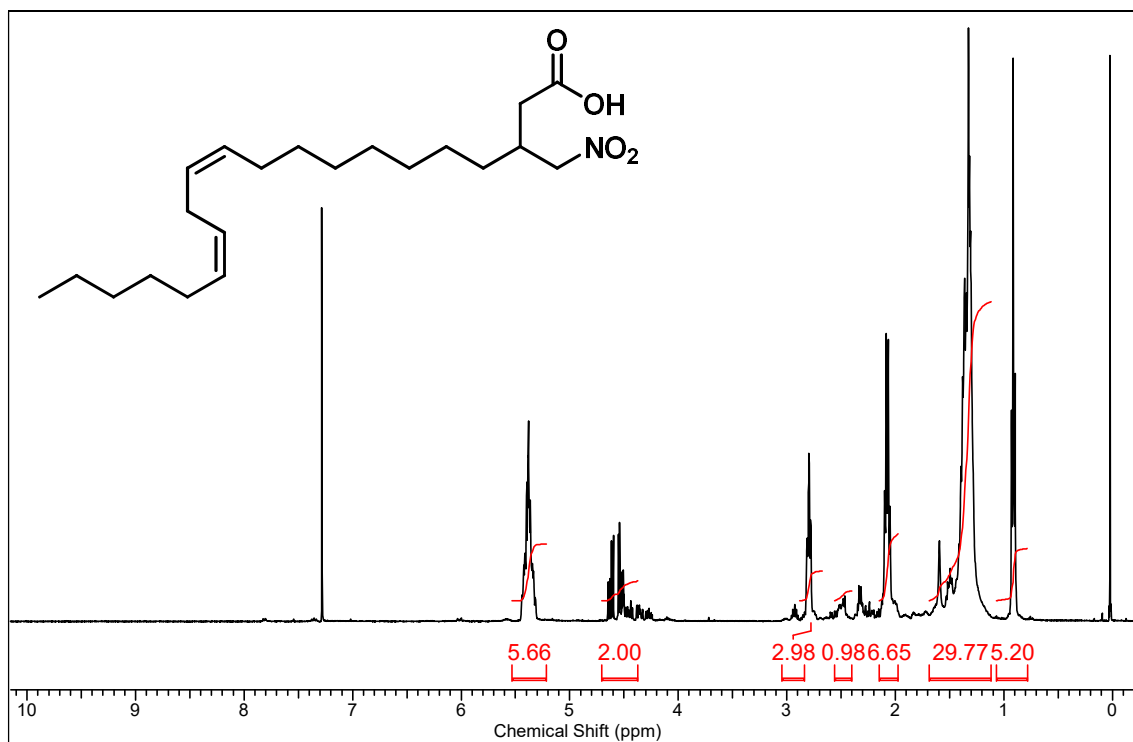

Figure S63. Spectrum of  $^1\text{H}$  NMR (300 MHz,  $\text{CDCl}_3$ ) of  $\gamma$ -nitro acid **11i**.

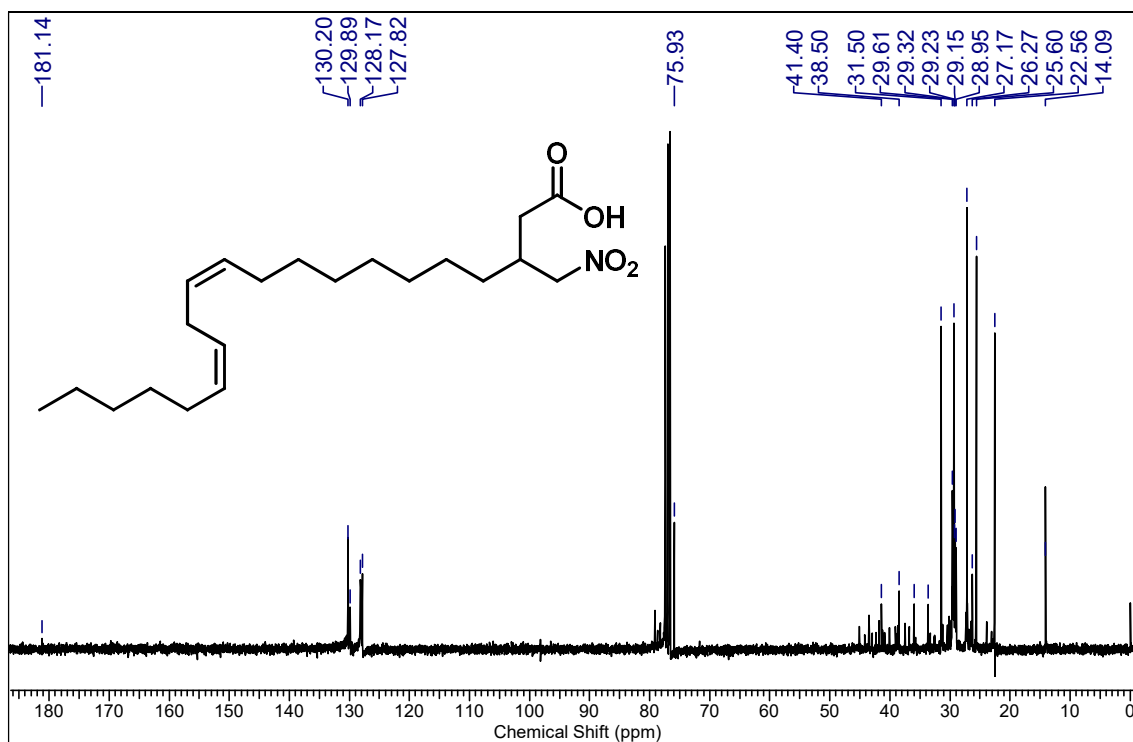

Figure S64. Spectrum of  $^{13}\text{C}$  NMR (75 MHz,  $\text{CDCl}_3$ ) of  $\gamma$ -nitro acid **11i**.

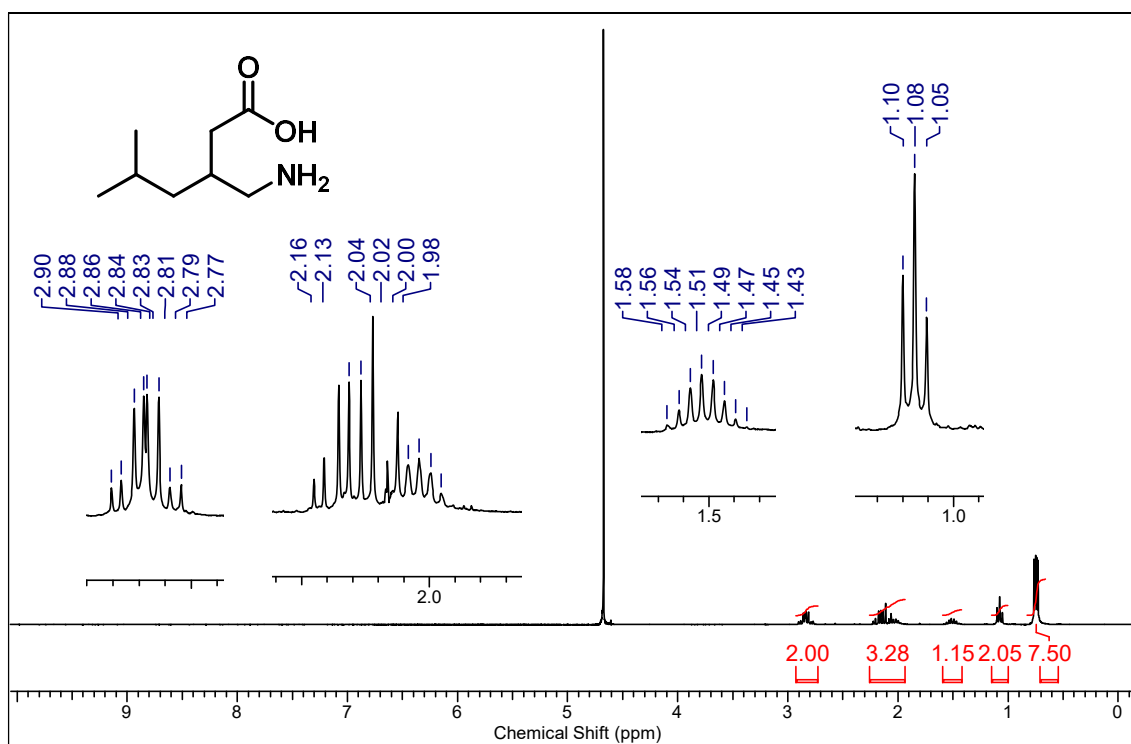

**Figure S65.** Spectrum of <sup>1</sup>H NMR (300 MHz, D<sub>2</sub>O, capillary CDCl<sub>3</sub>) of Pregabalin 2a.

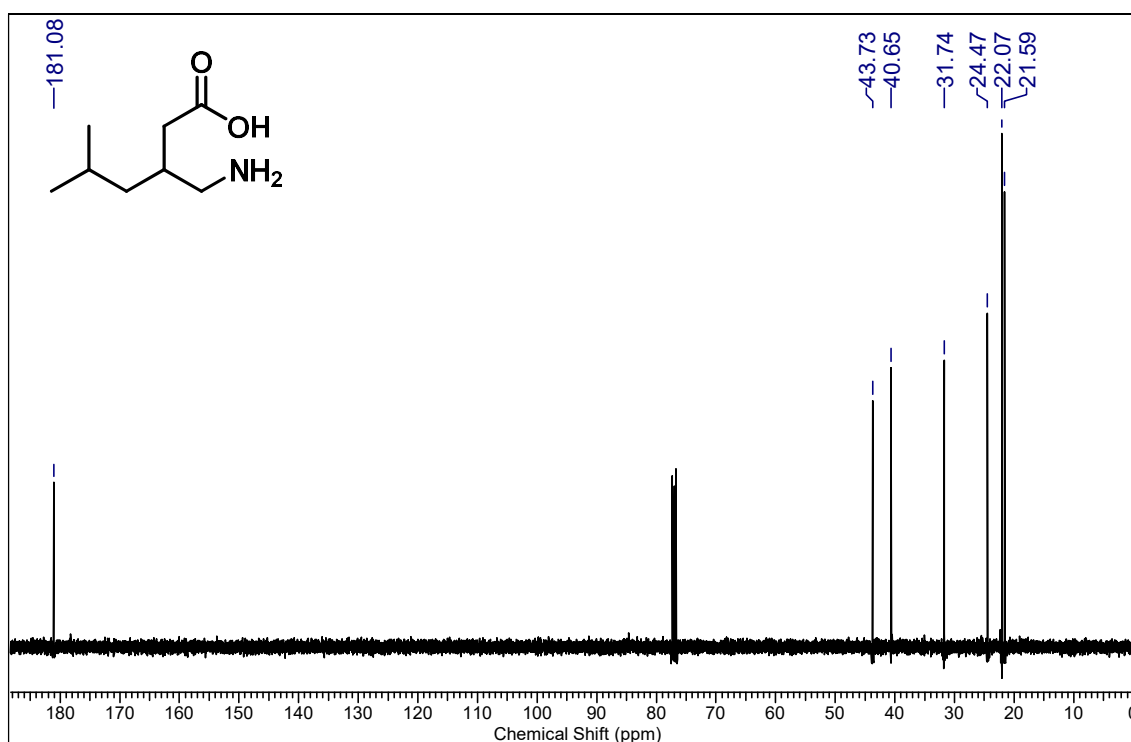

**Figure S66.** Spectrum of <sup>13</sup>C NMR (75 MHz, D<sub>2</sub>O, capillary CDCl<sub>3</sub>) of Pregabalin 2a.

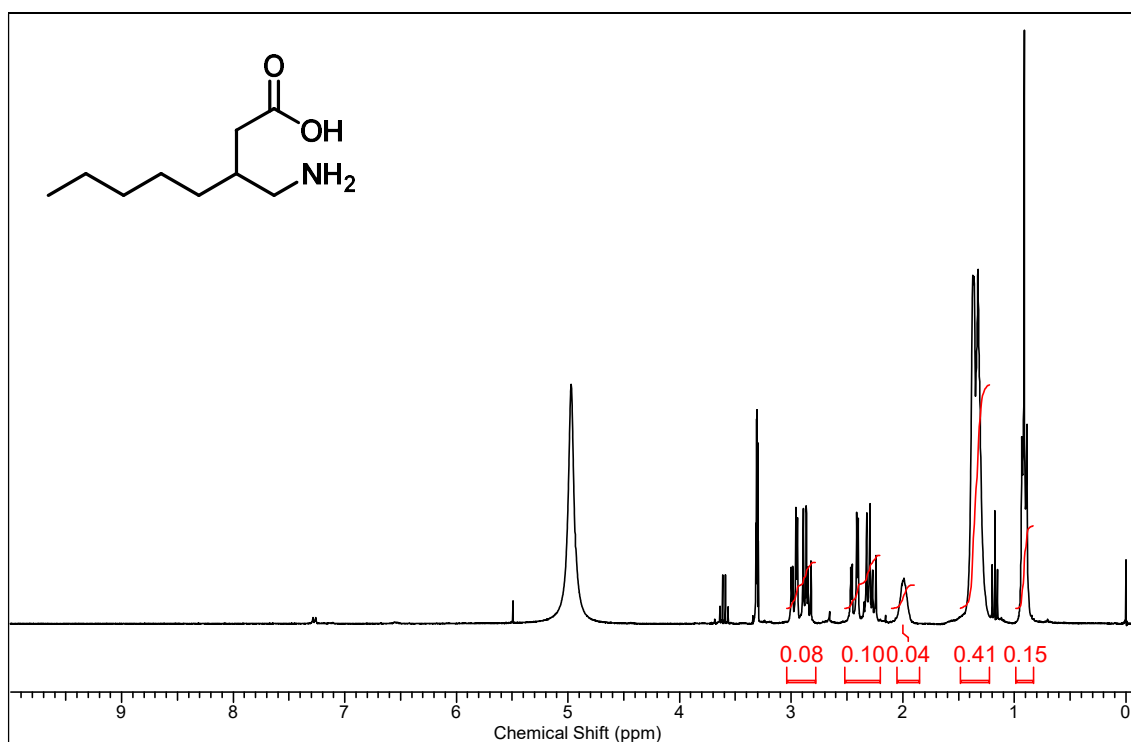

**Figure S67.** Spectrum of  $^1\text{H}$  NMR (300 MHz,  $\text{MeOH-}d_4$ ) of  $\gamma$ -amino acid **2b**.

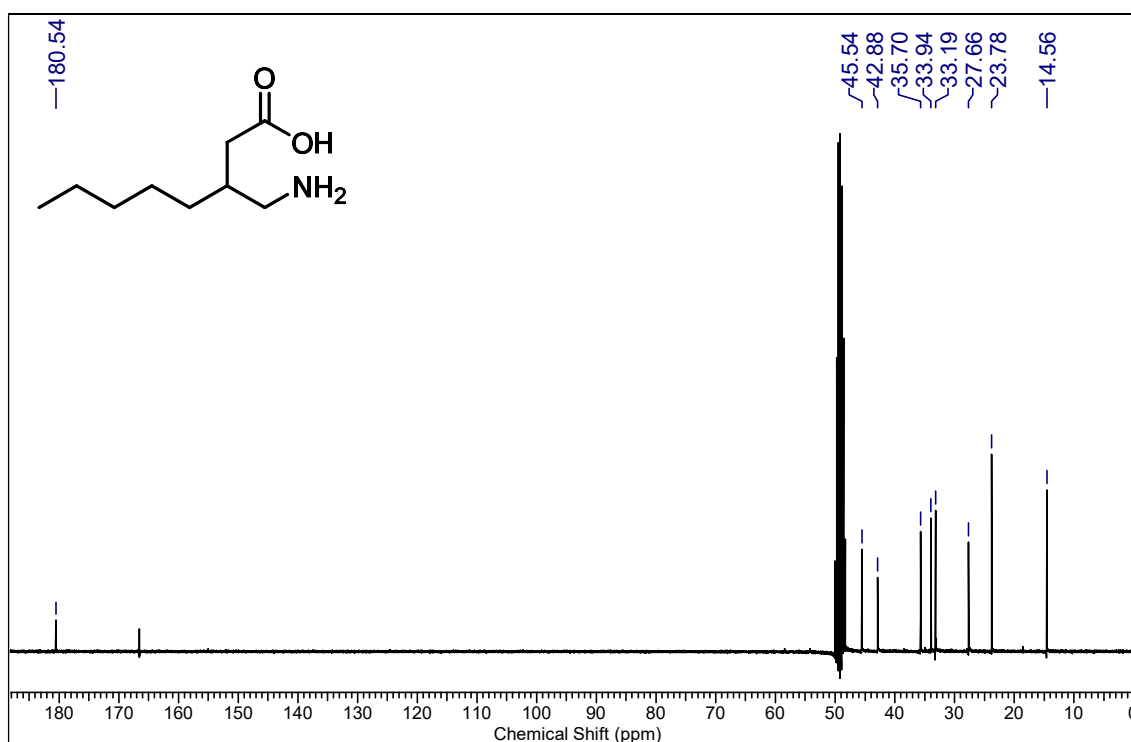

**Figure S68.** Spectrum of  $^{13}\text{C}$  NMR (300 MHz,  $\text{MeOH-}d_4$ ) of  $\gamma$ -amino acid **2b**.

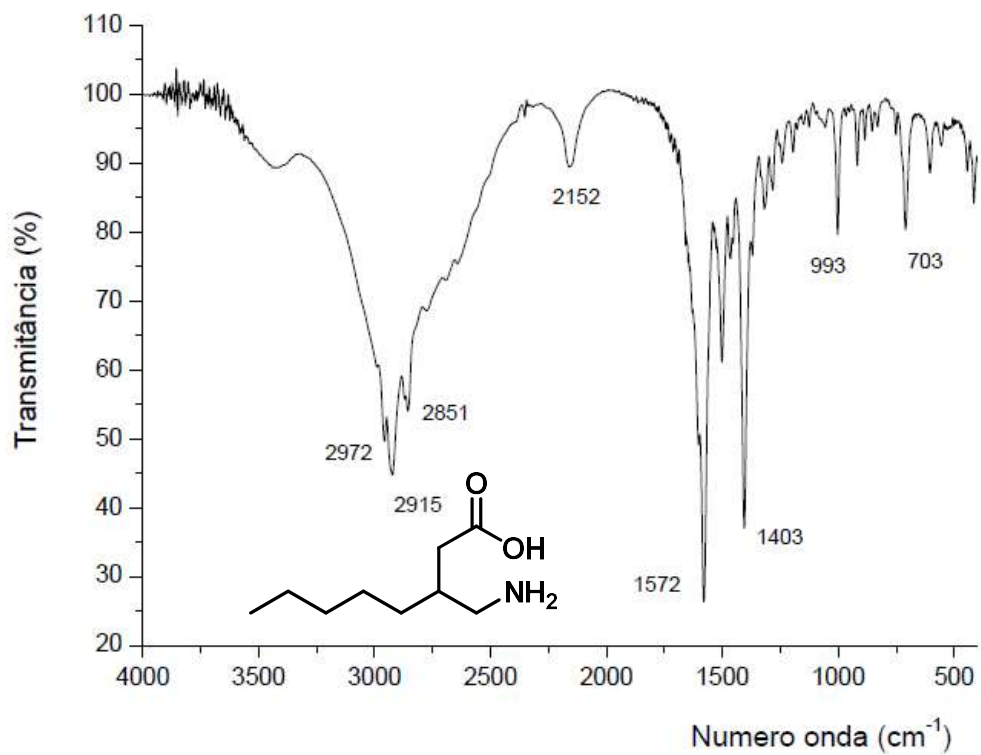

Figure S69. Spectrum of IR (KBr) of  $\gamma$ -nitro acid **2b**.

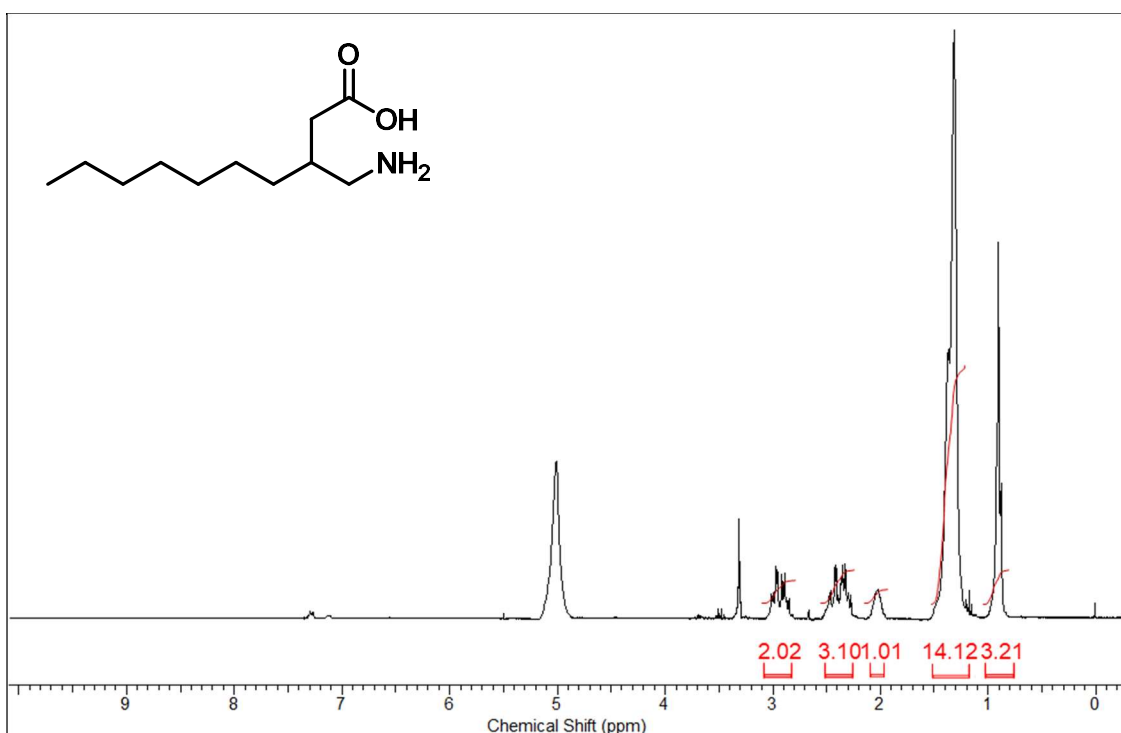

Figure S70. Spectrum of  $^1\text{H}$  NMR (300 MHz,  $\text{MeOH-}d_4$ ) of  $\gamma$ -amino acid **2c**.

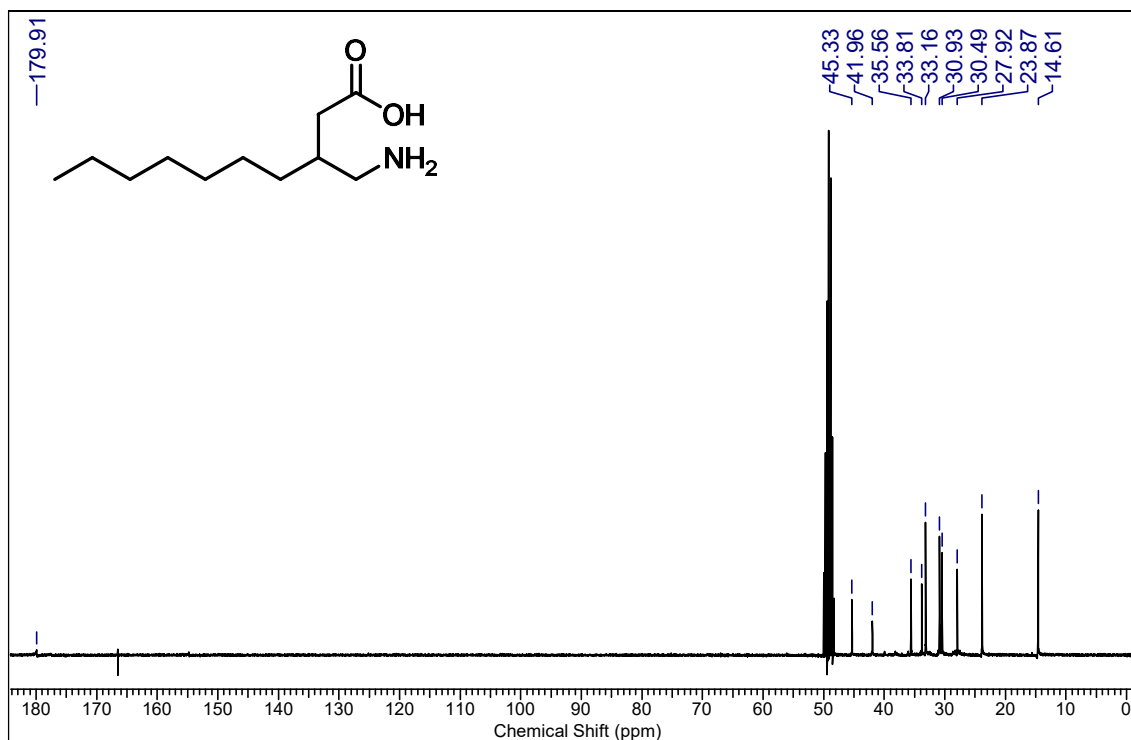

**Figure S71.** Spectrum of  $^{13}\text{C}$  NMR (75 MHz,  $\text{MeOH-}d_4$ ) of  $\gamma$ -amino acid **2c**.

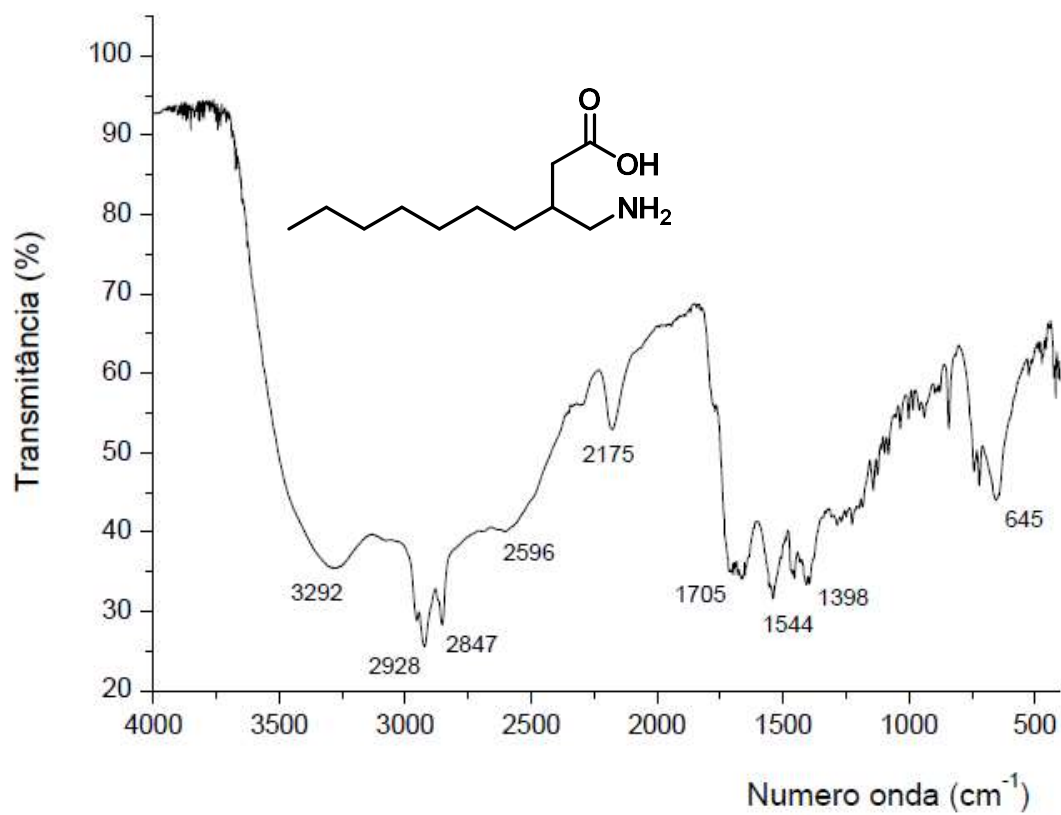

**Figure S72.** Spectrum of IR (KBr) of  $\gamma$ -nitro acid **2c**.

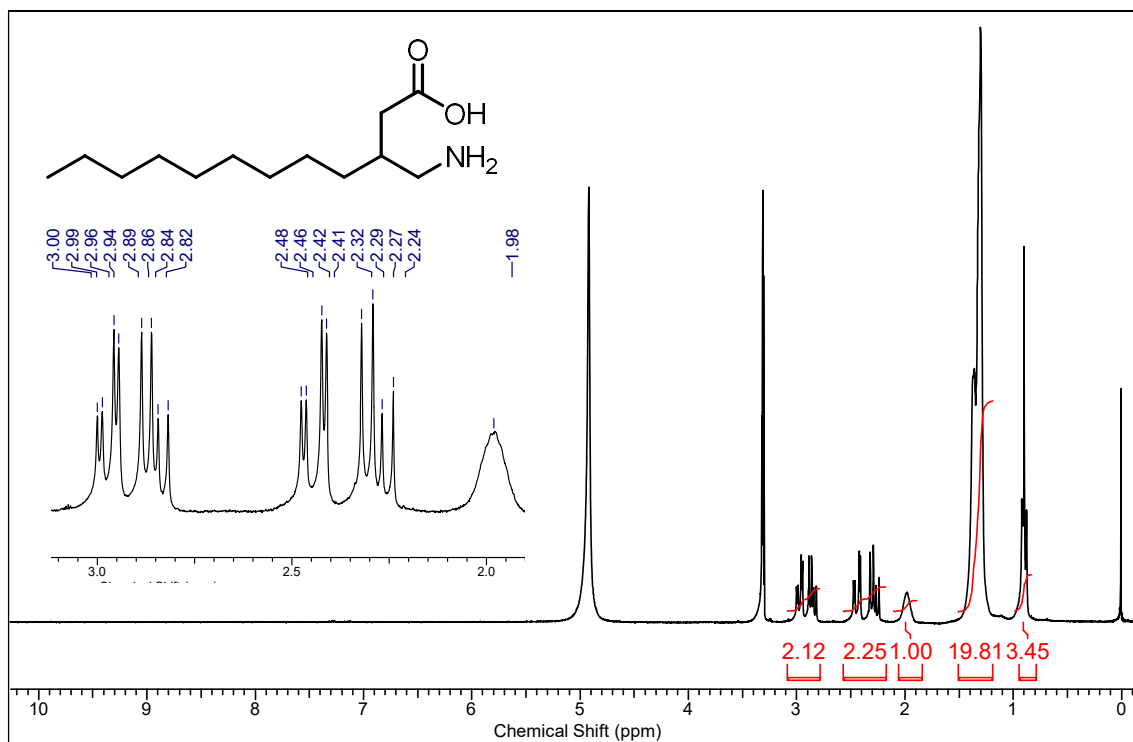

**Figure S73.** Spectrum of  $^1\text{H}$  NMR (300 MHz, MeOH- $d_4$ ) of  $\gamma$ -amino acid **2d**.

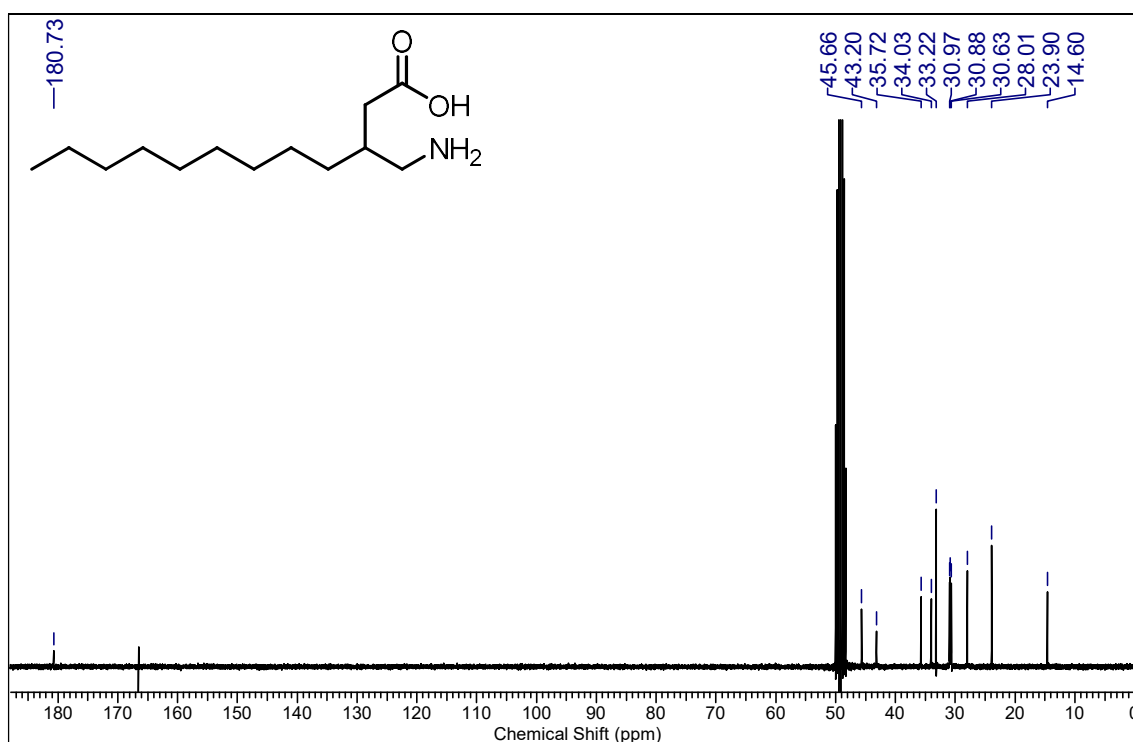

**Figure S74.** Spectrum of  $^{13}\text{C}$  NMR (75 MHz, MeOH- $d_4$ ) of  $\gamma$ -amino acid **2d**.

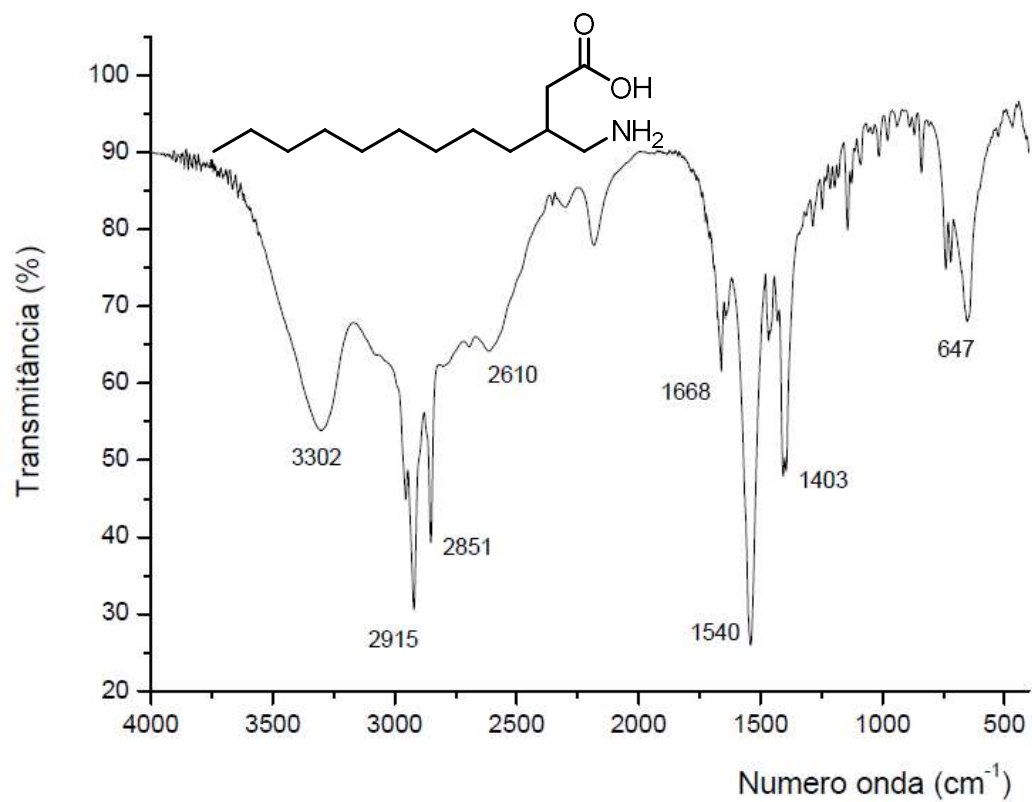

**Figure S75.** Spectrum of IR (KBr) of  $\gamma$ -nitro acid **2d**.

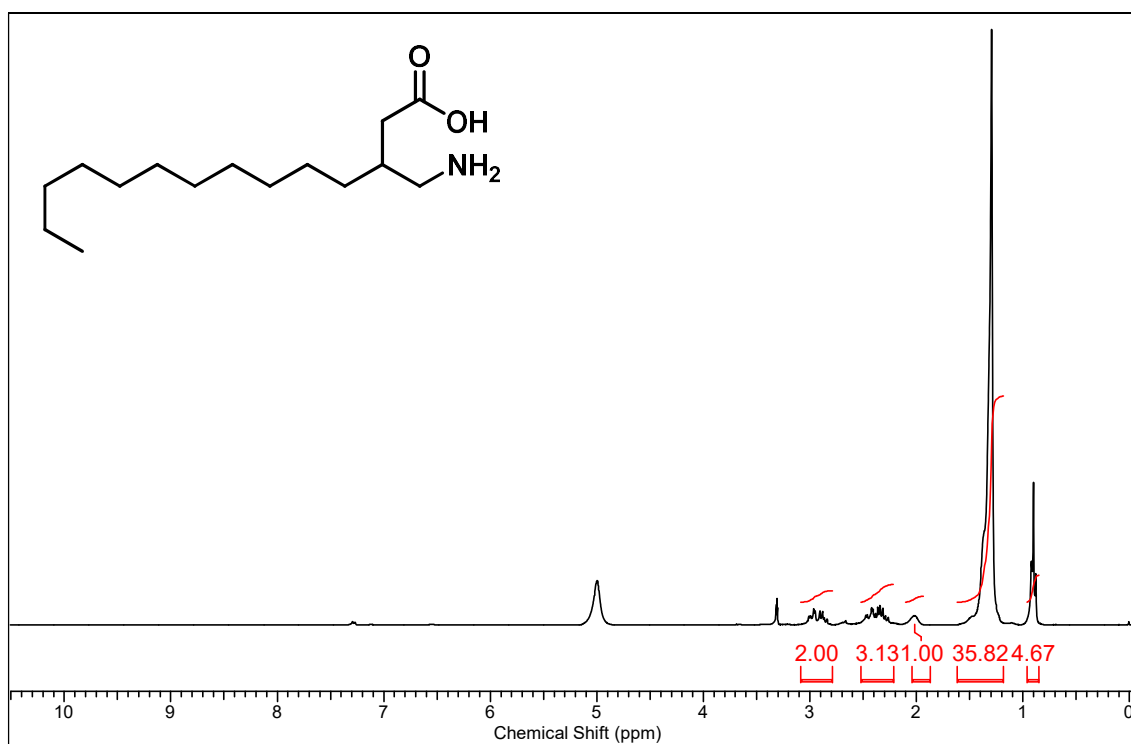

**Figure S76.** Spectrum of  $^1\text{H}$  NMR (300 MHz,  $\text{MeOH-}d_4$ ) of  $\gamma$ -amino acid **2e**.

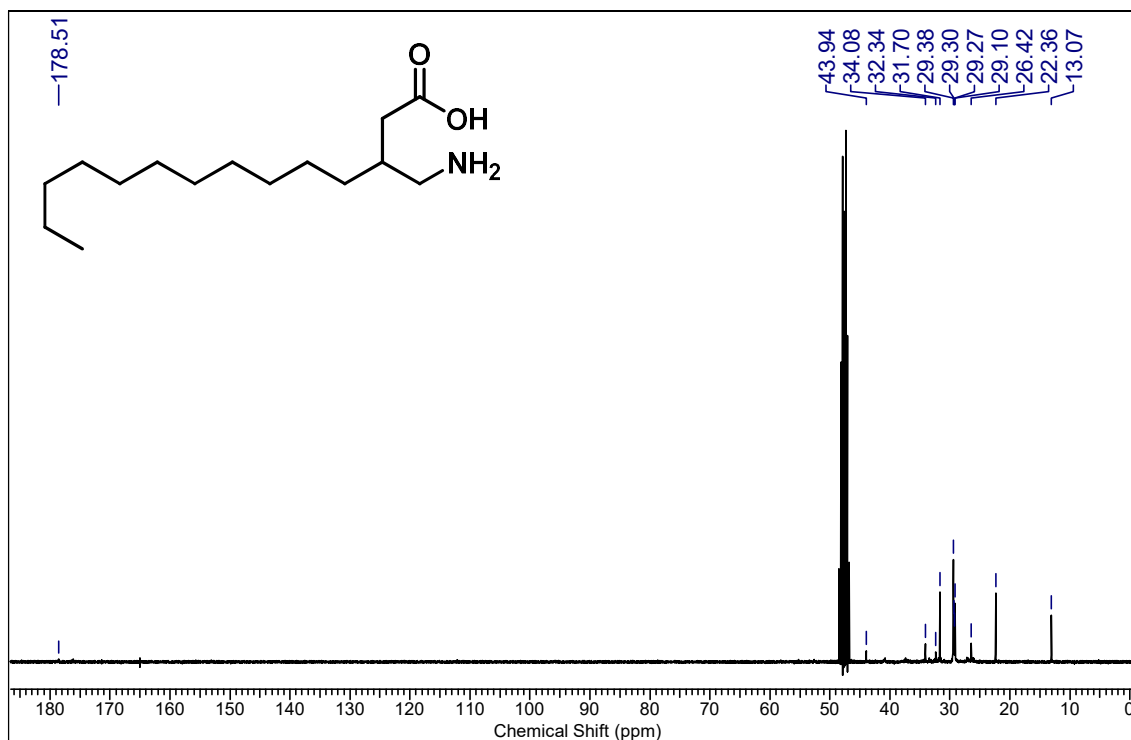

**Figure S77.** Spectrum of  $^{13}\text{C}$  NMR (75 MHz,  $\text{MeOH-}d_4$ ) of  $\gamma$ -amino acid **2e**.

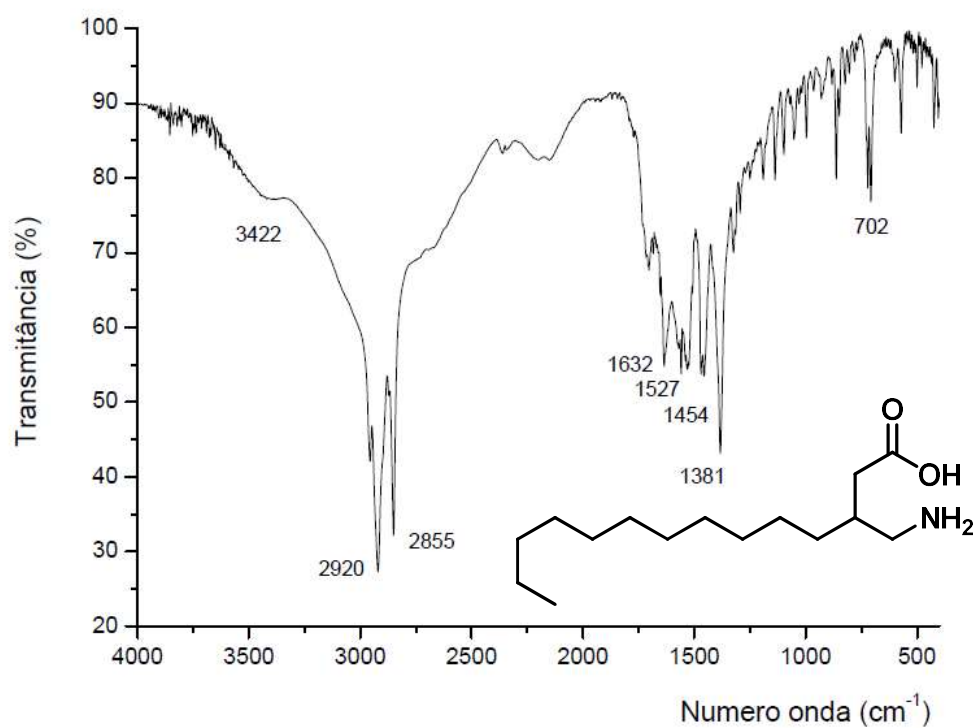

**Figure S78.** Spectrum of IR (KBr) of  $\gamma$ -nitro acid **2e**.



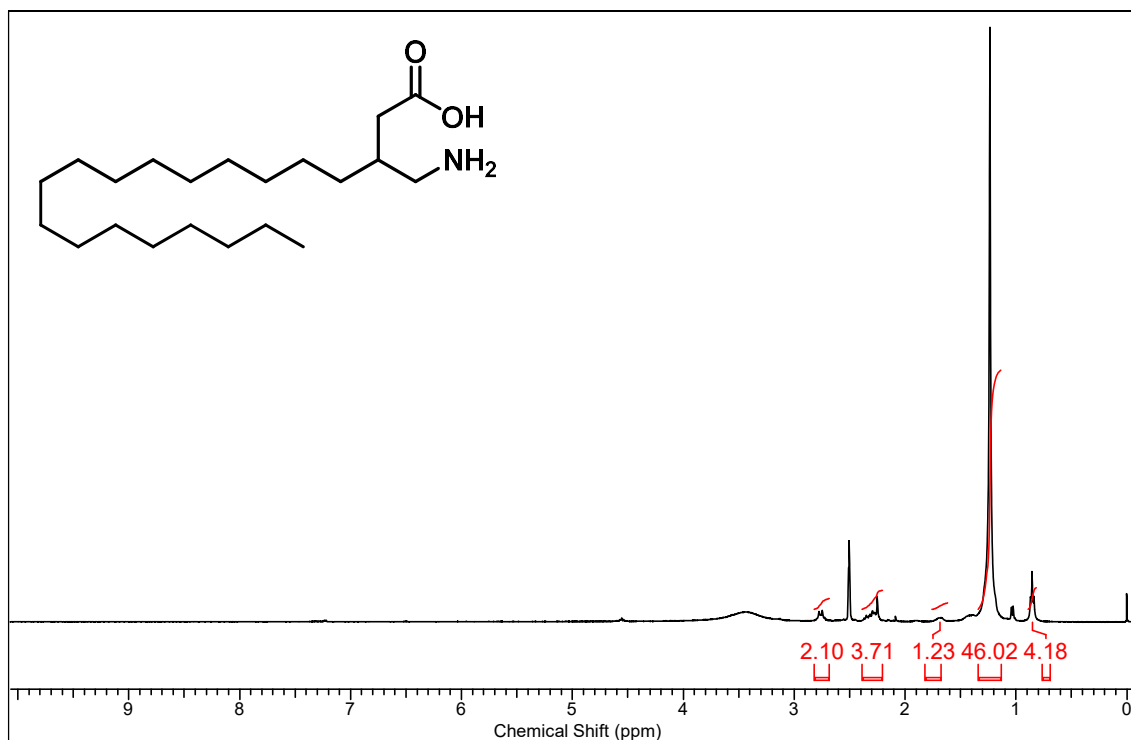

**Figure S79.** Spectrum of  $^1\text{H}$  NMR (300 MHz,  $\text{DMSO-}d_6$ ) of  $\gamma$ -amino acid **2g**.

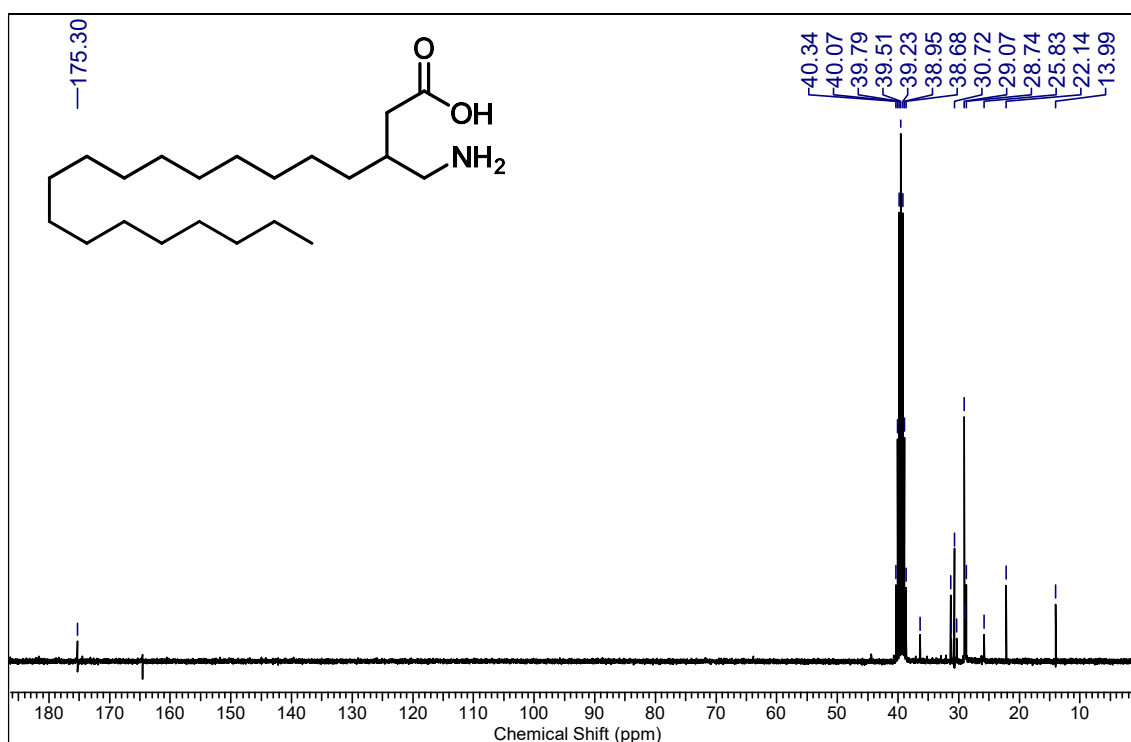

**Figure S80.** Spectrum of  $^{13}\text{C}$  NMR (75 MHz,  $\text{DMSO-}d_6$ ) of  $\gamma$ -amino acid **2g**.
